# Supplementary material for: Visible-light-promoted synthesis of gem-dihaloenones
Source: Royal Society of Chemistry journal article supplement (doi:10.1039/d2gc03989c), 2023-01-01
Supplement: d2gc03989c1.pdf [file d2gc03989c1.pdf]

# Supporting information

## Visible-Light-Promoted Synthesis of *gem*-Dihaloenones

**Yu-Bin Wang, Fei Chen,\* Min Li, Qingqing Bu, Zhihong Du, Jichang Liu, Bin Dai,\* and Ning Liu\***

School of Chemistry and Chemical Engineering/State Key Laboratory Incubation Base for Green Processing of Chemical Engineering, Shihezi University, North 4th Road, Shihezi, Xinjiang 832003, China

\*E-mail for Fei Chen: chenf19925@shzu.edu.cn

\*E-mail for Bin Dai: db\_tea@shzu.edu.cn

\*E-mail for Ning Liu: ningliu@shzu.edu.cn

## Table of contents

1. General information
2. Optimization of methanol concentration
3. General procedure for the synthesis of *gem*-dihaloenones 2 and 3
4. Procedure for the scale-up experiments
5. Preparation of DMS<sup>18</sup>O and [O]-Labeling Experiments with DMS<sup>18</sup>O and H<sub>2</sub><sup>18</sup>O
6. Deuterated Experiments with phenylacetylene 1a-D
7. HRMS spectra for radical trapping and intermediate 12
8. UV-vis spectra experiments for CBr<sub>4</sub>
9. GC spectra for detecting CH<sub>4</sub>
10. Evaluation of Green Chemistry metrics of the thermal method
11. NMR spectra data for *gem*-dihaloenones
12. NMR and HRMS spectra for *gem*-dihaloenones

## 1. General information

Unless otherwise stated, all experimental procedures were performed under nitrogen atmosphere using Schlenk techniques. All solvents and materials were purchased from commercial suppliers and used without further purification. Flash chromatography was carried out using silica gel (200–300 mesh). Reactions were monitored by Thin Layer Chromatography (TLC) using UV light (254nm) for detection. The NMR spectra were recorded using a Bruker Avance III HD 400 spectrometer using TMS as the internal standard (400 MHz for  $^1\text{H}$  NMR, 100 MHz for  $^{13}\text{C}$  NMR 376 MHz for  $^{19}\text{F}$  NMR). Mass spectroscopy data were collected by using a Waters UPLC G2-XS Qtof mass spectrometer. The LED strip light (5050SMD, 0.5 m, 14 W, 400 nm) was purchased from Prime LED Co. Ltd.

## 2. Optimization of methanol concentration

**Table S1.** Optimization of methanol concentration <sup>a</sup>

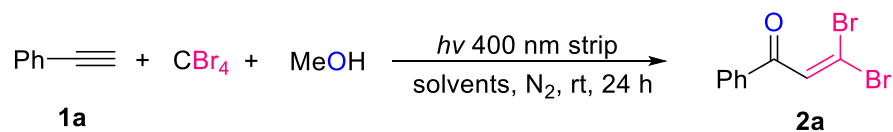

| Entry | Solvent                   | CH <sub>3</sub> OH (X μL)   | Yield (%) <sup>b</sup> |
|-------|---------------------------|-----------------------------|------------------------|
| 1     | H <sub>2</sub> O (1 mL)   | CH <sub>3</sub> OH (40 μL)  | <5                     |
| 2     | H <sub>2</sub> O (1 mL)   | CH <sub>3</sub> OH (80 μL)  | 13                     |
| 3     | H <sub>2</sub> O (1 mL)   | CH <sub>3</sub> OH (120 μL) | 16                     |
| 4     | H <sub>2</sub> O (1 mL)   | CH <sub>3</sub> OH (160 μL) | 27                     |
| 5     | H <sub>2</sub> O (1 mL)   | CH <sub>3</sub> OH (200 μL) | 31                     |
| 6     | CH <sub>3</sub> CN (1 mL) | CH <sub>3</sub> OH (40 μL)  | 36                     |
| 7     | CH <sub>3</sub> CN (1 mL) | CH <sub>3</sub> OH (80 μL)  | 49                     |
| 8     | CH <sub>3</sub> CN (1 mL) | CH <sub>3</sub> OH (120 μL) | 56                     |
| 9     | CH <sub>3</sub> CN (1 mL) | CH <sub>3</sub> OH (160 μL) | 59                     |
| 10    | CH <sub>3</sub> CN (1 mL) | CH <sub>3</sub> OH (200 μL) | 60                     |

<sup>a</sup> Reaction conditions: phenylacetylene (0.4 mmol), CBr<sub>4</sub> (0.5 mmol), CH<sub>3</sub>OH (loading amount as indicated in **Table S1**) in solvents (1 mL) with irradiation using a 14-W 400-nm strip under a N<sub>2</sub> atmosphere at room temperature for 24 h. <sup>b</sup> Isolated yield.

### 3. General procedure for the synthesis of *gem*-dibromoenones compounds 2

#### Reaction condition 1:

CBr<sub>4</sub> (165 mg, 0.5 mmol) was taken in a 25 mL reaction tube with a stir bar, the reaction tube was vacuumed and then filled with nitrogen three times. Subsequently, alkynes (0.4 mmol), H<sub>2</sub>O (350 μL) and dimethyl sulfoxide (1 mL) were added to the reaction tube. The mixture was irradiated by 400-nm of purple light strip at room temperature for 24 h. Then pour brine (30 mL) into the reaction tube and extracted three times with dichloromethane (3 × 15 mL), organic layer was concentrated under vacuum and products were obtained by column chromatography (petroleum ether/ethyl acetate).

#### Reaction condition 2:

CBr<sub>4</sub> (165 mg, 0.5 mmol) was taken in a 25 mL reaction tube with a stir bar, the reaction tube was vacuumed and then filled with nitrogen three times. Subsequently, alkynes (0.4 mmol) and CH<sub>3</sub>OH (1 mL) were added to the reaction tube. The mixture was irradiated by 400-nm of purple light strip at room temperature for 24 h. Then the mixture was concentrated under vacuum and products were obtained by column chromatography (petroleum ether/ethyl acetate).

### General procedure for the synthesis of *gem*-dichloroenones compounds 3

#### Reaction condition 1:

In a 25 mL reaction tube with a stir bar, the reaction tube was vacuumed and then filled with nitrogen three times. Subsequently, CCl<sub>3</sub>Br (92 μL, 1.0 mmol), alkynes (0.4 mmol), H<sub>2</sub>O (350 μL) and dimethyl sulfoxide (1 mL) were added to the reaction tube. The mixture was irradiated by 400-nm of purple light strip at room temperature for 24 h. Then pour brine (30 mL) into the reaction tube and extracted three times with dichloromethane (3 × 15 mL), organic layer was concentrated under vacuum and products were obtained by column chromatography (petroleum ether/ethyl acetate).

#### Reaction condition 3:

In a 25 mL reaction tube with a stir bar, the reaction tube was vacuumed and then filled with nitrogen three times. Subsequently, alkynes (0.4 mmol), CCl<sub>3</sub>Br (92 μL, 1.0 mmol) and CH<sub>3</sub>CH<sub>2</sub>OH (1 mL) were added to the reaction tube. The mixture was irradiated by 400-nm of purple light strip at room temperature for 24 h. Then the mixture was concentrated under vacuum and products were obtained by column chromatography (petroleum ether/ethyl acetate).

## 4. Procedure for the scale-up experiments

### 4.1 Procedure for the scale-up experiments for synthesizing 3,3-dibromo-1-phenylprop-2-en-1-one (2a)

#### Reaction condition 1:

CBr<sub>4</sub> (2.068 g, 6.25 mmol) was taken in a 50 mL reaction tube with a stir bar, the reaction tube was vacuumed and then filled with nitrogen three times. Subsequently, phenylacetylene (5.0 mmol), H<sub>2</sub>O (5 mL) and dimethyl sulfoxide (10 mL) were added to the reaction tube. The mixture was irradiated by 400-nm of purple light strip at room temperature for 36 h. Then pour brine (50 mL) into the reaction tube and extracted three times with dichloromethane (3 × 20 mL), organic layer was concentrated under vacuum and *gem*-dibromoeneone **2a** (76%, 1.09g) were obtained by column chromatography (petroleum ether/ethyl acetate).

#### Reaction condition 2:

CBr<sub>4</sub> (2.068 g, 6.25 mmol) were taken in a 50 mL reaction tube with a stir bar, the reaction tube was vacuumed and then filled with nitrogen three times. Subsequently, phenylacetylene (5.0 mmol) and CH<sub>3</sub>OH (5 mL) were added to the reaction tube. The mixture was irradiated by 400-nm of purple light strip at room temperature for 36 h. Then the mixture was concentrated under vacuum and *gem*-dibromoeneone **2a** (71%, 1.02g) were obtained by column chromatography (petroleum ether/ethyl acetate).

### 4.2 Procedure for the scale-up experiments for synthesizing 3,3-dichloro-1-phenylprop-2-en-1-one (3a)

#### Reaction condition 1:

In a 50 mL reaction tube with a stir bar, the reaction tube was vacuumed and then filled with nitrogen three times. Subsequently, CCl<sub>3</sub>Br (2.478 g, 12.5 mmol), phenylacetylene (5.0 mmol), H<sub>2</sub>O (5 mL) and dimethyl sulfoxide (10 mL) were added to the reaction tube. The mixture was irradiated by 400-nm of purple light strip at room temperature for 36 h. Then pour brine (50 mL) into the reaction tube and extracted three times with dichloromethane (3 × 20 mL), organic layer was concentrated under vacuum and *gem*-dichloroeneone **3a** (78%, 0.78g) were obtained by column chromatography (petroleum ether/ethyl acetate).

#### Reaction condition 3:

In a 50 mL reaction tube with a stir bar, the reaction tube was vacuumed and then filled with nitrogen three times. Subsequently, CCl<sub>3</sub>Br (2.478 g, 12.5 mmol), phenylacetylene (5.0 mmol), and CH<sub>3</sub>CH<sub>2</sub>OH (5 mL) were added to the reaction tube. The mixture was irradiated by 400-nm of purple light strip at room temperature for 36 h. Then the mixture was concentrated under vacuum and *gem*-dichloroeneone **3a** (81%, 0.81g) were obtained by column chromatography (petroleum ether/ethyl acetate).

## 5. Preparation of DMS<sup>18</sup>O and [O]-Labeling Experiments with DMS<sup>18</sup>O and H<sub>2</sub><sup>18</sup>O

### 5.1 Preparation of DMS<sup>18</sup>O<sup>1</sup>

(1) Preparation of bromodimethylsulfoniumbromide (BDMS)

7.2 mL (132 mmol) Bromine was added drop wise to an ice-cooled solution of 9.68 mL (132 mmol) dimethyl sulfide in 120 mL carbon tetrachloride and the mixture was stirred for 2 h. Yellow orange crystals were formed, then filtered and washed with cold carbon tetrachloride. The solid (28 g) was recrystallized in carbon tetrachloride and provided yellow solid BDMS.

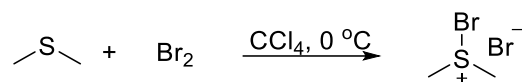

Scheme S1. Synthesis of BDMS

(2) Preparation of DMS<sup>18</sup>O: In a stirred solution of dry triethylamine (25.2 mL, 180 mmol) and H<sup>18</sup>O (97 atom %<sup>18</sup>O; 0.80 mL, 44 mmol) in 60 mL of dry tetrahydrofuran at 0 °C, solid BDMS (20.0 g, 90 mmol) was added portion wise over 30 min. Trimethylamine hydrobromide was precipitated and removed by centrifugation and then filtered. Dried the yellow filtrate to remove the solvent. The DMS<sup>18</sup>O (2.2 g, 75 atom % <sup>18</sup>O) was obtained as brownish liquid.

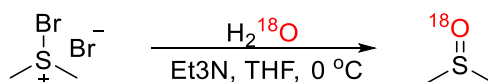

Scheme S2. Synthesis of DMS<sup>18</sup>O

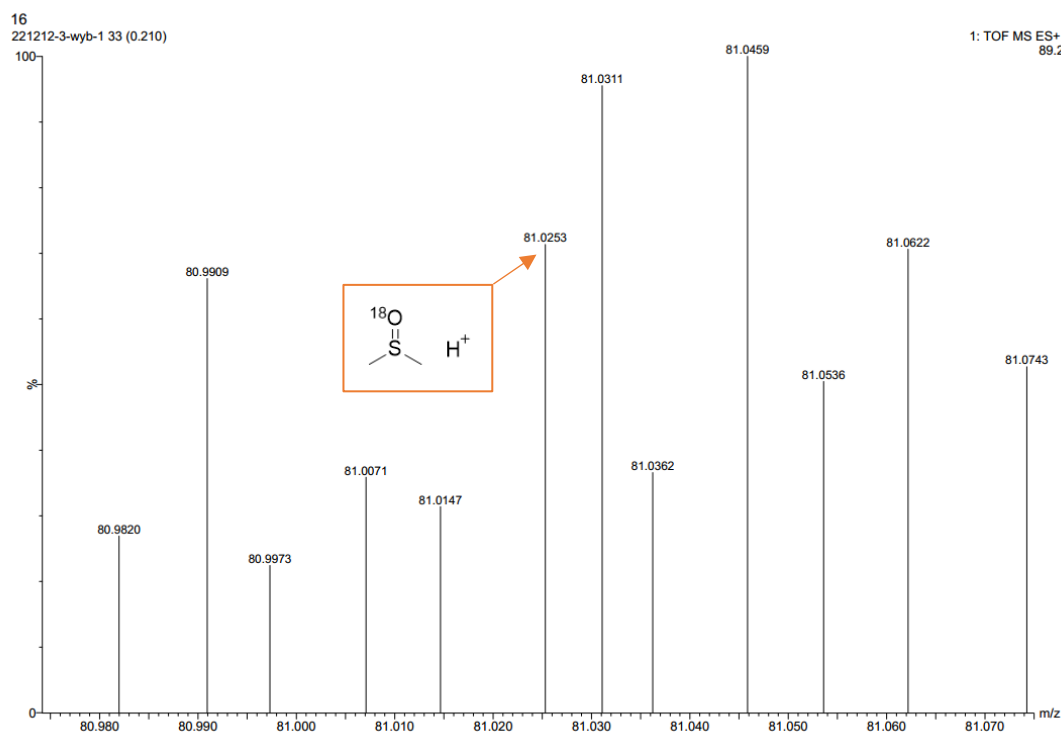

Figure S1. HRMS Spectra of DMS<sup>18</sup>O

### 5.2 [O]-Labeling Experiments with H<sub>2</sub><sup>18</sup>O

$\text{CBr}_4$  (165 mg, 0.5 mmol) was taken in a 25 mL reaction tube with a stir bar, the reaction tube was vacuumed and then filled with nitrogen three times. Subsequently, phenylacetylene (0.4 mmol),  $\text{H}_2^{18}\text{O}$  (350  $\mu\text{L}$ ) and dimethyl sulfoxide (1 mL) were added to the reaction tube. The mixture was irradiated by 400-nm of purple light strip at room temperature for 24 h. Then pour brine (30 mL) into the reaction tube and extracted three times with dichloromethane ( $3 \times 15$  mL), organic layer was concentrated under vacuum and products were obtained by column chromatography (petroleum ether/ethyl acetate) to deliver the  $2\text{a}^{18}\text{O}$ .

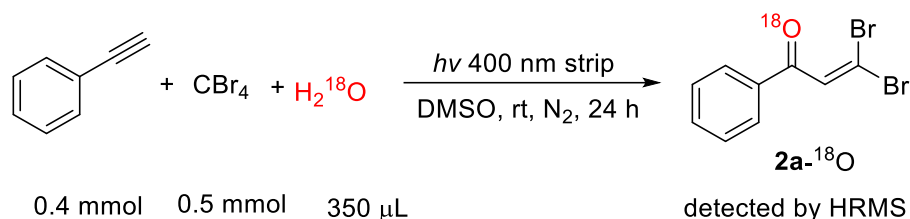

**Scheme S3.** [O]-Labeling Experiments with  $\text{H}_2^{18}\text{O}$

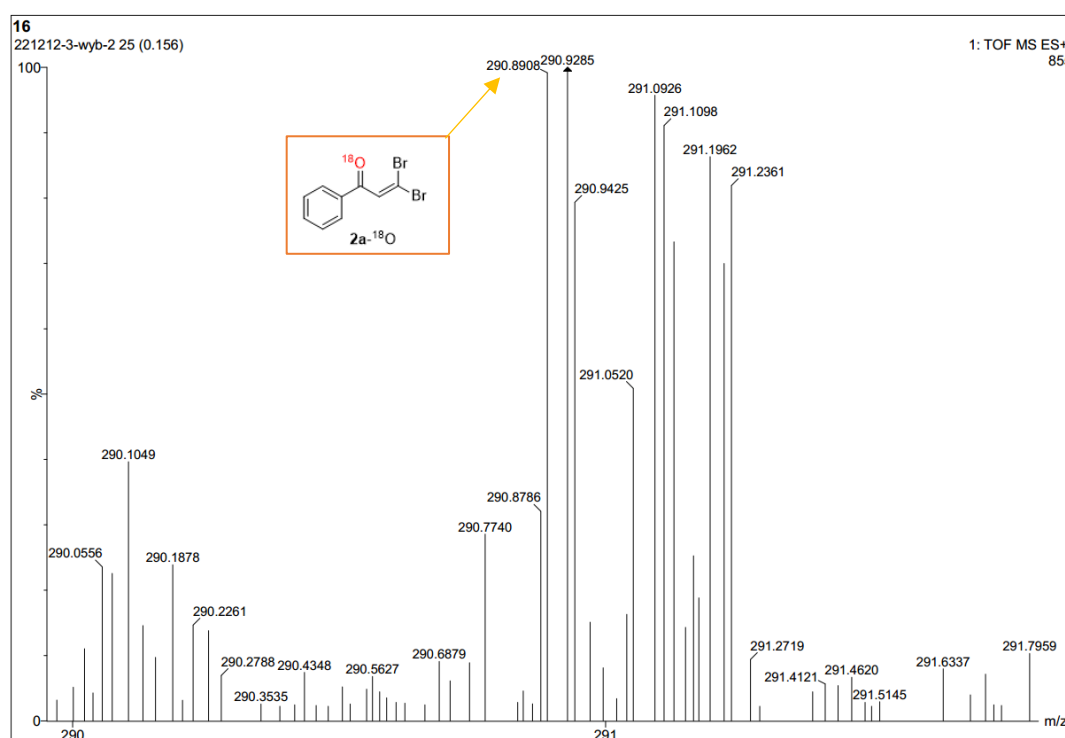

### 5.3 [O]-Labeling Experiments with $\text{DMS}^{18}\text{O}$

$\text{CBr}_4$  (165 mg, 0.5 mmol) was taken in a 25 mL reaction tube with a stir bar, the reaction tube was vacuumed and then filled with nitrogen three times. Subsequently, phenylacetylene (0.4 mmol),  $\text{DMS}^{18}\text{O}$  (1 mL) were added to the reaction tube. The mixture was irradiated by 400-nm of purple light strip at room temperature for 24 h. Then pour brine (30 mL) into the reaction tube and extracted three times with dichloromethane ( $3 \times 15$  mL), organic layer was concentrated under vacuum and products were obtained by column chromatography (petroleum ether/ethyl acetate) to deliver the  $2\text{a}^{18}\text{O}$ .



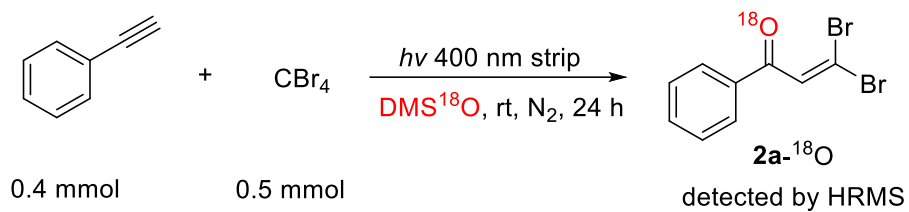

**Scheme S4.** [O]-Labeling Experiments with DMS<sup>18</sup>O

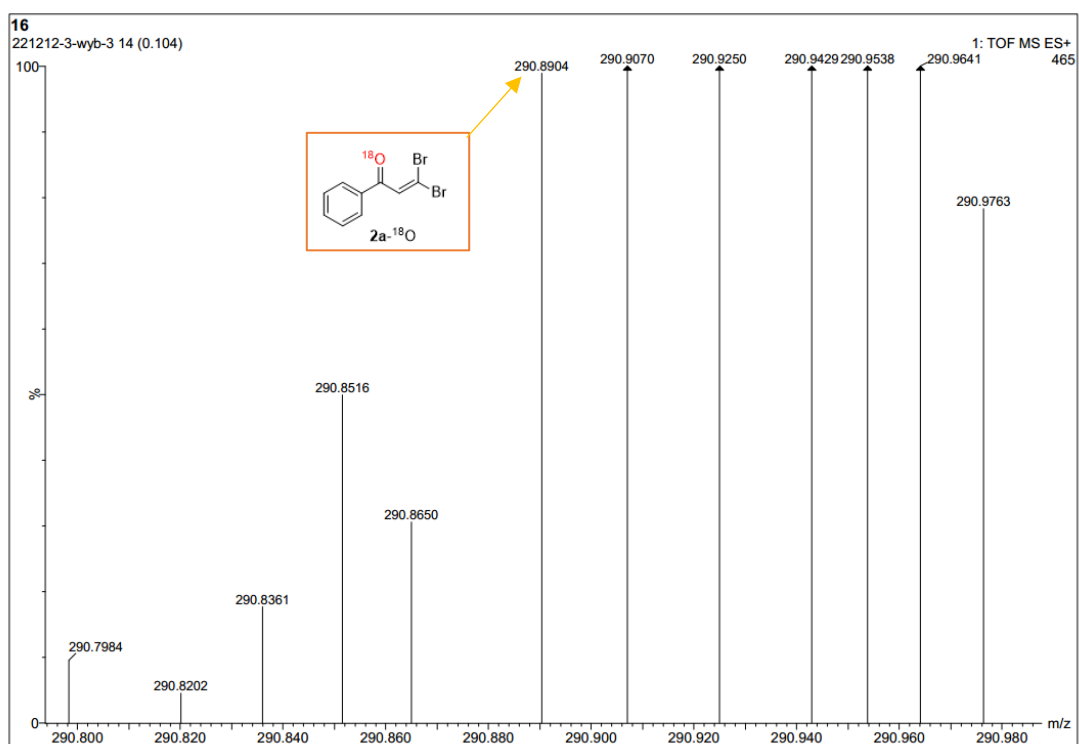

**Figure S3.** HRMS Spectra of **2a-<sup>18</sup>O**

## 6. Deuterated Experiments with phenylacetylene 1a-D

### 6.1 Preparation of phenylacetylene 1a-D<sup>2</sup>

In an oven-dried reaction tube with a stir bar, phenylacetylene **1a** (0.5 mmol) and 20 mol % of crushed KOH in 0.8 mL of DMSO-d<sub>6</sub> were added. The reaction mixture was stirring at 60 °C for 30 minutes. Then pour brine (30 mL) into the reaction tube and extracted three times with dichloromethane (3 × 10 mL), and dried over Na<sub>2</sub>SO<sub>4</sub>, and then the organic layer was concentrated under vacuum. Phenylacetylene **1a-D** (90%-D) was obtained by column chromatography (petroleum ether).

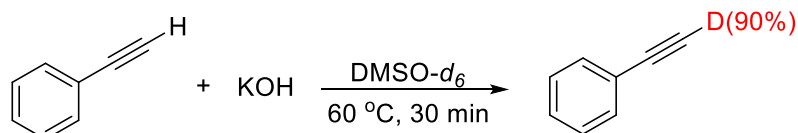

Scheme S5. Synthesis of phenylacetylene **1a-D**

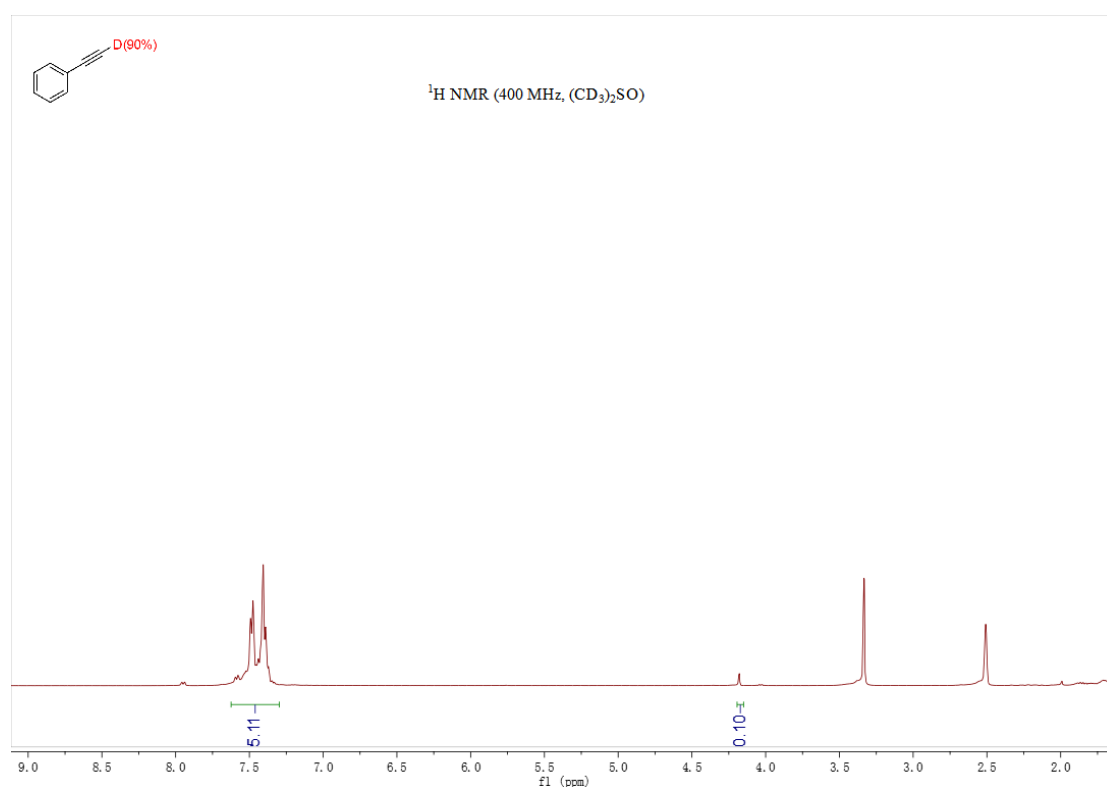

Figure S4. <sup>1</sup>H NMR Spectra of **1a-D**

### 6.2 Deuterated Experiments with phenylacetylene 1a-D

#### Reaction condition 1:

CBr<sub>4</sub> (165 mg, 0.5 mmol) was taken in a 25 mL reaction tube with a stir bar, the reaction tube was vacuumed and then filled with nitrogen three times. Subsequently, phenylacetylene **1a-D** (0.2 mmol), H<sub>2</sub>O (350 μL) and dimethyl sulfoxide (1 mL) were added to the reaction tube. The mixture was irradiated by 400-nm of purple light strip at room temperature for 24 h. Then pour brine (30 mL)

into the reaction tube and extracted three times with dichloromethane ( $3 \times 15$  mL), organic layer was concentrated under vacuum and products were obtained by column chromatography (petroleum ether/ethyl acetate) to deliver the **2a-D**.

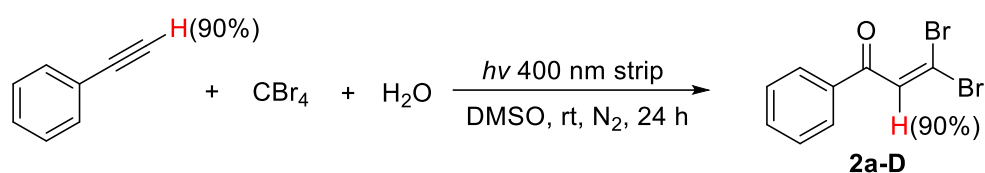

**Scheme S6.** Deuterated Experiments with phenylacetylene **1a-D**

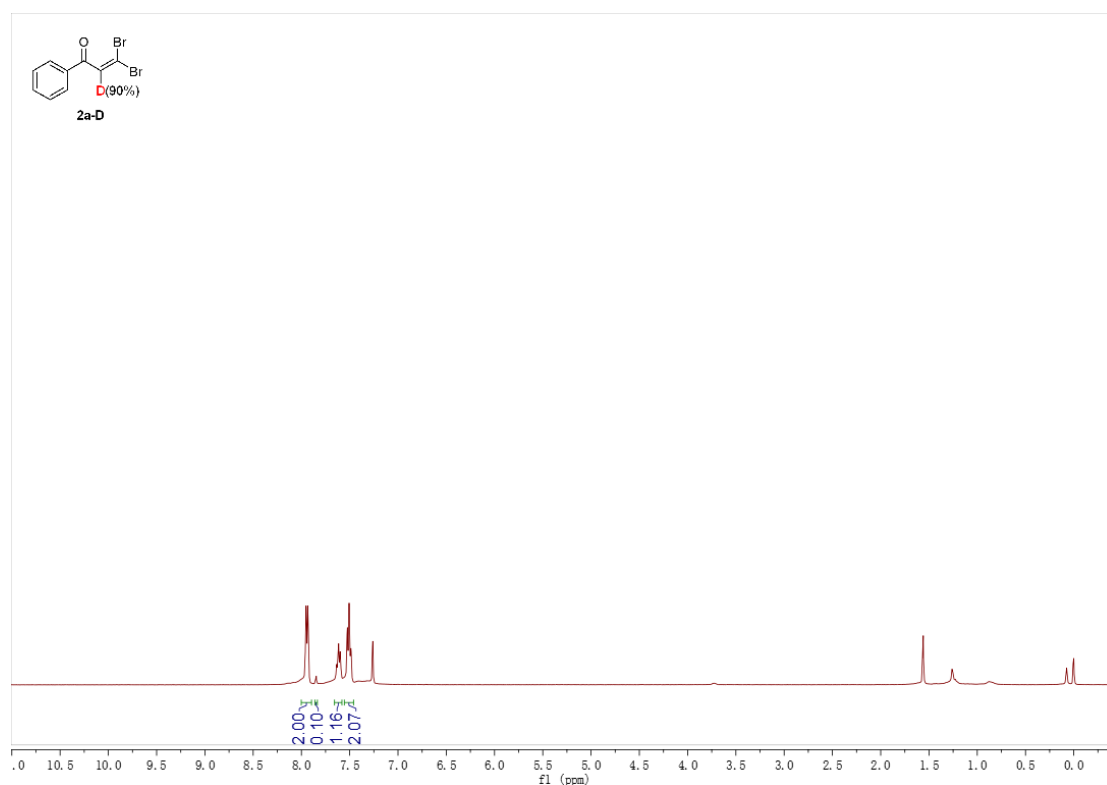

**Reaction condition 2:**

$\text{CBr}_4$  (165 mg, 0.5 mmol) was taken in a 25 mL reaction tube with a stir bar, the reaction tube was vacuumed and then filled with nitrogen three times. Subsequently, phenylacetylene **1a-D** (0.2 mmol) and  $\text{CH}_3\text{OH}$  (1 mL) were added to the reaction tube. The mixture was irradiated by 400-nm of purple light strip at room temperature for 24 h. Then the mixture was concentrated under vacuum and products were obtained by column chromatography (petroleum ether/ethyl acetate) to deliver the **2a-D**.

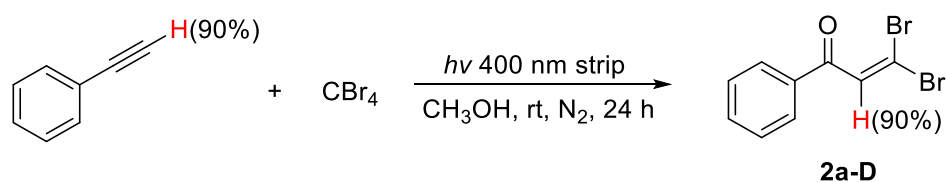

**Scheme S7.** Deuterated experiments with phenylacetylene **1a-D**

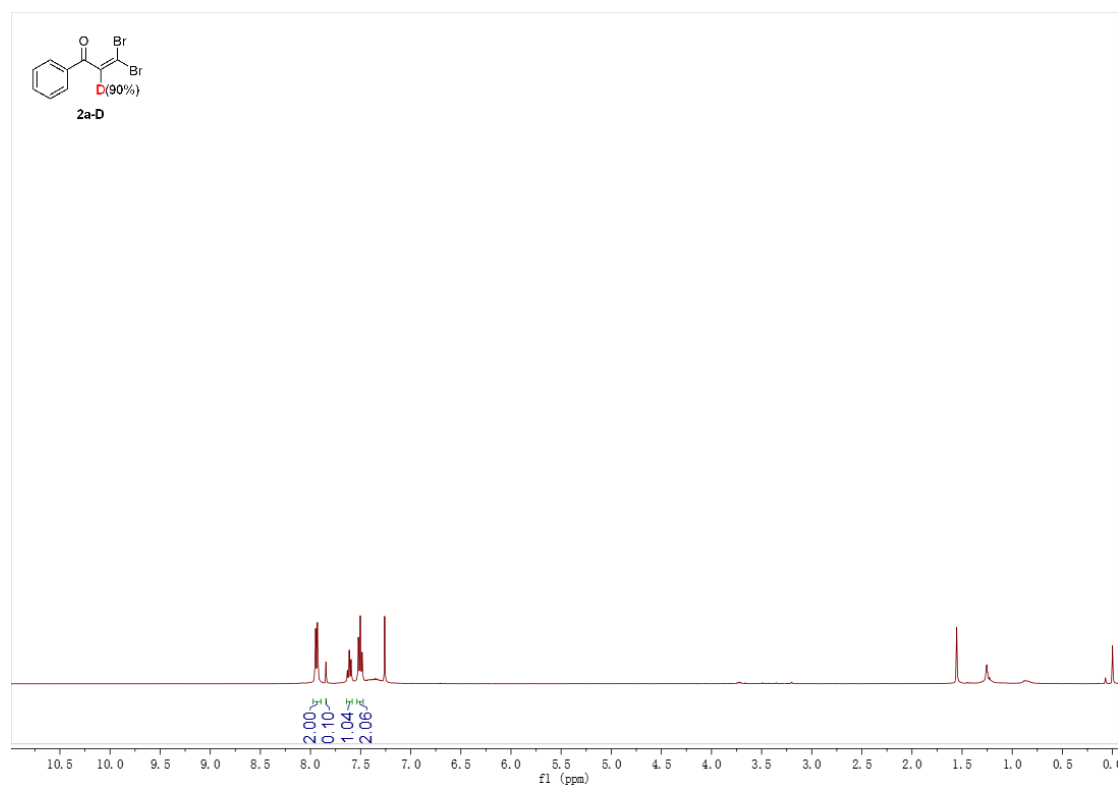

**Figure S6.** <sup>1</sup>H NMR Spectra of **2a-D**

## 7. HRMS Spectrum for Radical Trapping and intermediate 12

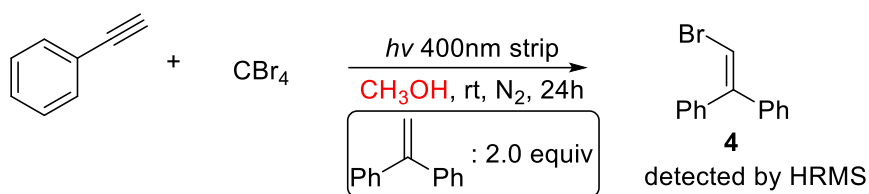

**Scheme S8.** Radical trapping experiments with ethene-1,1-diyldibenzene

$\text{CBr}_4$  (165 mg, 0.5 mmol) and ethene-1,1-diyldibenzene (0.8 mmol, 141  $\mu\text{L}$ , 2.0 equiv.) were taken in a 25 mL reaction tube with a stir bar, the reaction tube was vacuumed and then filled with nitrogen three times. Subsequently, phenylacetylene (0.4 mmol) and  $\text{CH}_3\text{OH}$  (1 mL) were added to the reaction tube. The mixture was irradiated by 400 nm of purple light strip at room temperature for 24 h. The radical captured product **4** could be detected by high resolution mass spectroscopy (HRMS) (ESI)  $m/z$ :  $[\text{M} + \text{H}]^+$  Calcd for  $\text{C}_{14}\text{H}_{12}\text{Br}$  259.0117; found 251.01169.

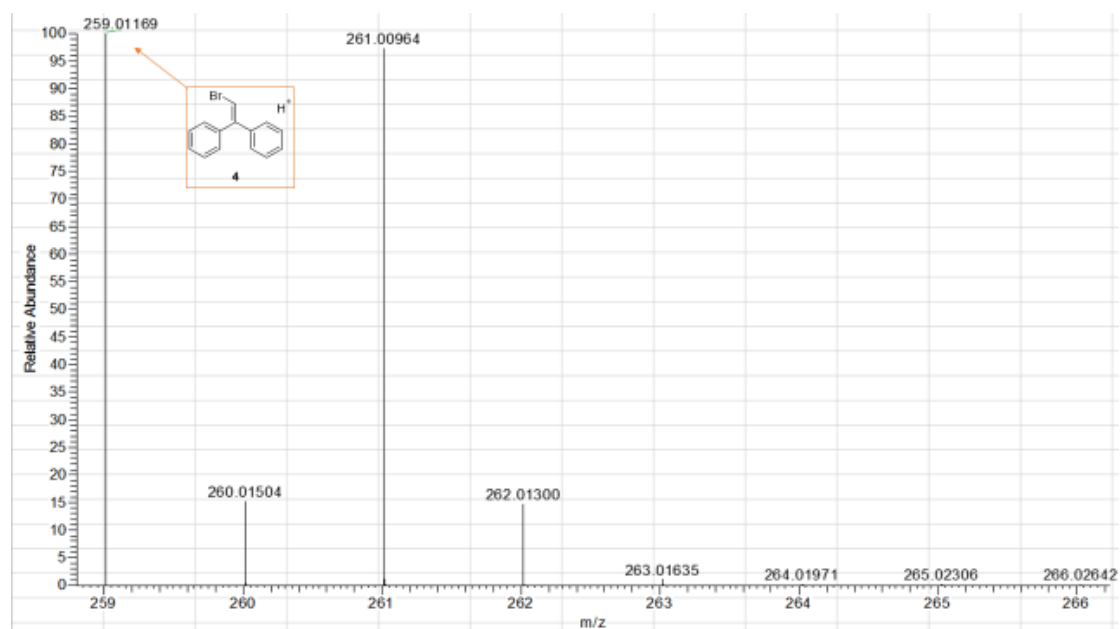

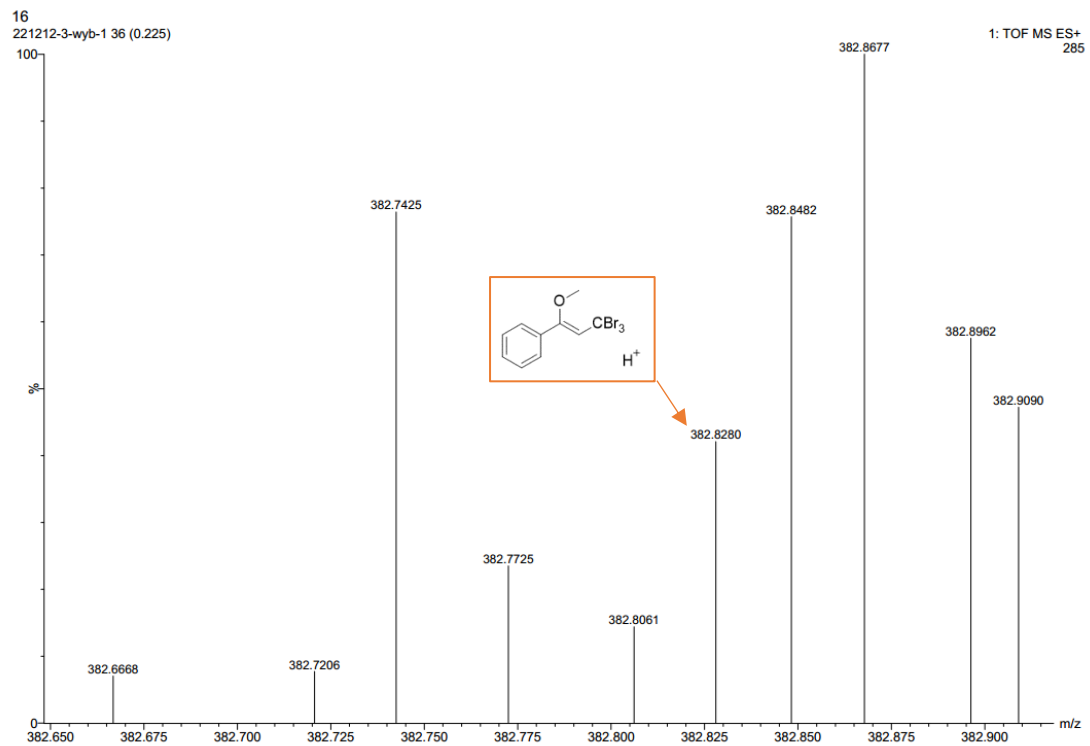

Figure S7. HRMS Spectra of **4** (top) and intermediate **12** (bottom).

## 8. UV-vis spectra experiments for CBr<sub>4</sub>

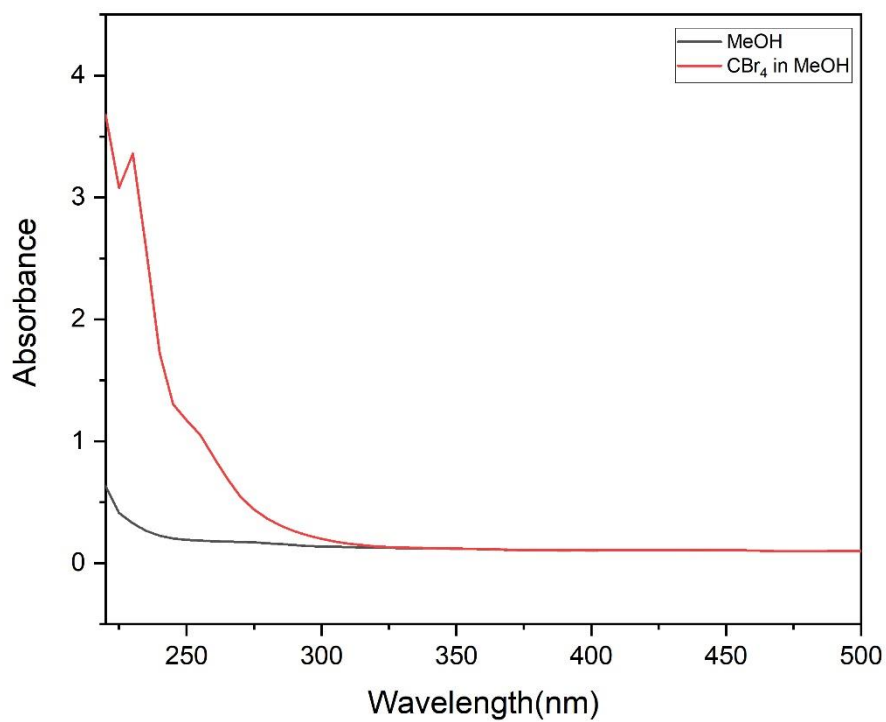

**Figure S8.** UV-vis spectra experiments: (a) MeOH (black curve); (b) CBr<sub>4</sub> ( $5.0 \times 10^{-4}$  mol/L) in MeOH.

## 9. GC Spectra for detecting CH<sub>4</sub>

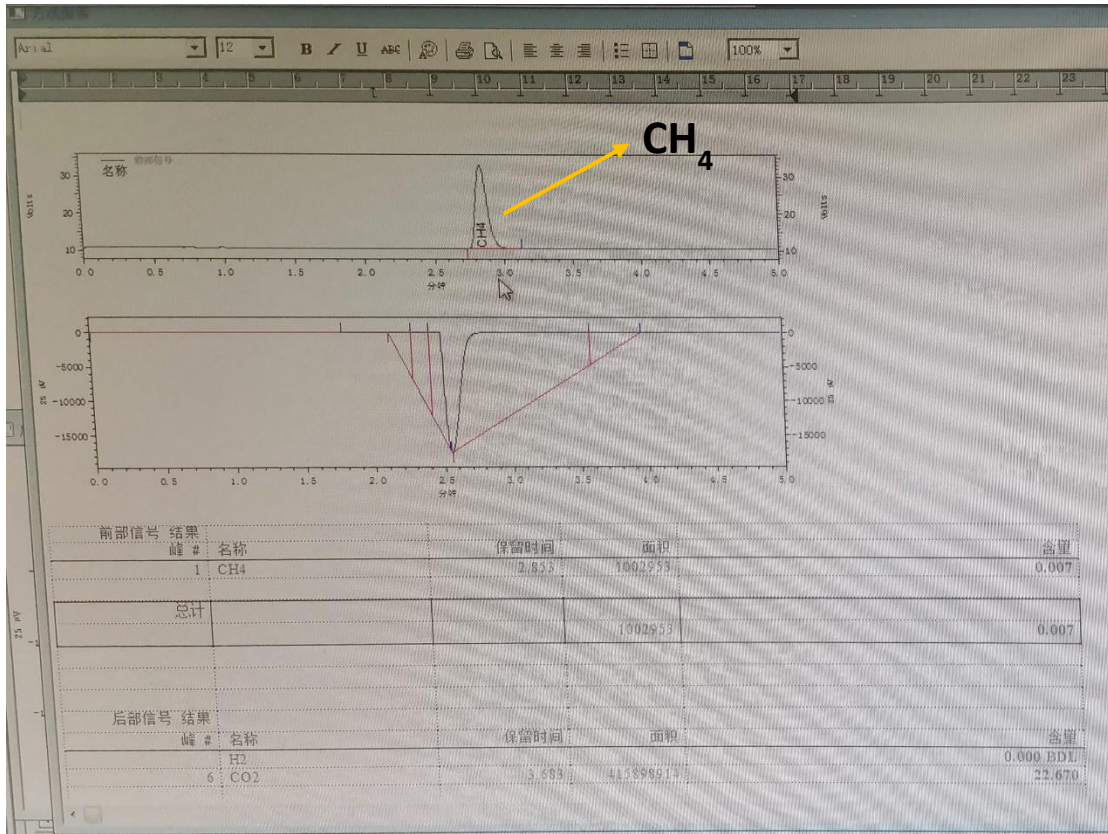

Figure S9. GC Spectra for detecting CH<sub>4</sub>



## 10. Evaluation of Green Chemistry metrics of the thermal method<sup>3</sup>

$$\text{Atom economy (\%)} = \frac{\text{Molecular mass of desired product}}{\text{Molecular mass of all reactants}} \times 100\%$$

(AE)

$$\text{Reaction mass efficiency (\%)} = \frac{\text{Mass of desired product}}{\text{Mass of all reactants}} \times 100\%$$

(RME)

|            |                                     |             |           |           |
|------------|-------------------------------------|-------------|-----------|-----------|
| Reactant 1 | Phenylacetylene                     | 0.51g       | 5.0 mmol  | FW 102.13 |
| Reactant 2 | Tetrabromomethane                   | 1.69g       | 5.1 mmol  | FW 331.62 |
| Reactant 3 | water                               | 4 ml, 4.0 g |           | FW 18     |
| Oxidant    | Potassium persulfate                | 2.7g        | 10 mmol   | FW 270.32 |
| Solvent    | EtOH                                | 1 ml, 0.79g |           |           |
| Product    | 3,3-dibromo-1-phenylprop-2-en-1-one | 1.02g       | 3.52 mmol | FW 289.95 |

Product yield = 71%

$$\text{E-factor} = \frac{0.51 + 1.69 + 4.0 + 2.7 + 0.79 - 1.02}{1.02} = 8.5 \text{ Kg waste/ 1 Kg product}$$

$$\text{Atom economy} = \frac{289.95}{465.79} \times 100 = 64.2\%$$

$$\text{Atom efficiency} = \frac{71\% \times 64.2\%}{100} = 45.6\%$$

$$\text{Carbon efficiency} = \frac{9}{8 + 1} \times 100 = 100\%$$

$$\text{Reaction mass efficiency} = \frac{1.02\text{g}}{0.51\text{g} + 1.69\text{g}} \times 100 = 46.4\%$$

**Figure S10.** Green chemistry metrics for the synthesis of **2a**

## 11. The NMR spectra data for *gem*-dihaloenones

**3,3-dibromo-1-phenylprop-2-en-1-one (2a)**<sup>3</sup>: Following the general conditions **1** and **2**, purification by flash chromatography (petroleum/EtOAc = 50:1), yellow oil (**1**: 84%, 96.7 mg; **2**: 86%, 99.0 mg); <sup>1</sup>H NMR (400 MHz, CDCl<sub>3</sub>): δ 7.94 (d, *J* = 7.2 Hz, 2H), 7.85 (s, 1H), 7.63–7.60 (m, 1H), 7.52–7.48 (m, 2H), ppm; <sup>13</sup>C NMR (100 MHz, CDCl<sub>3</sub>): δ 186.7, 135.4, 132.8, 131.6, 127.9, 127.7, 102.3.

**3,3-dibromo-1-(o-tolyl)prop-2-en-1-one (2b)**<sup>3</sup>: Following the general conditions **1** and **2**, purification by flash chromatography (petroleum/EtOAc = 50:1), yellow oil (**1**: 81%, 97.8 mg; **2**: 64%, 77.2 mg); <sup>1</sup>H NMR (400 MHz, CDCl<sub>3</sub>): δ 7.64 (s, 1H), 7.61 (d, *J* = 7.2 Hz, 1H), 7.42 (t, *J* = 7.2 Hz, 1H), 7.31–7.27 (m, 2H), 2.53 (s, 3H), ppm; <sup>13</sup>C NMR (100 MHz, CDCl<sub>3</sub>): δ 190.9, 139.2, 136.6, 135.3, 132.2, 132.1, 129.5, 125.9, 102.9, 21.0.

**3,3-dibromo-1-(m-tolyl)prop-2-en-1-one (2c)**<sup>3</sup>: Following the general conditions **1** and **2**, purification by flash chromatography (petroleum/EtOAc = 50:1), yellow oil (**1**: 85%, 102.6 mg; **B**: 88%, 106.2 mg); <sup>1</sup>H NMR (400 MHz, CDCl<sub>3</sub>): δ 7.83 (s, 1H), 7.74–7.12 (m, 2H), 7.43–7.36 (m, 2H), 2.43 (s, 3H), ppm; <sup>13</sup>C NMR (100 MHz, CDCl<sub>3</sub>): δ 186.9, 137.8, 135.4, 133.6, 131.8, 128.1, 127.7, 124.9, 101.9, 20.3.

**3,3-dibromo-1-(p-tolyl)prop-2-en-1-one (2d)**<sup>3</sup>: Following the general conditions **1** and **2**, purification by flash chromatography (petroleum/EtOAc = 30:1), yellow oil (**1**: 90%, 108.6 mg; **2**: 81%, 97.7 mg); <sup>1</sup>H NMR (400 MHz, CDCl<sub>3</sub>): δ 7.84 (d, *J* = 8.4 Hz, 2H), 7.81 (s, 1H), 7.29 (d, *J* = 7.6 Hz, 2H), 2.43 (s, 3H), ppm; <sup>13</sup>C NMR (100 MHz, CDCl<sub>3</sub>): δ 186.4, 144.0, 132.8, 131.9, 128.6, 127.8, 101.5, 20.8.

**3,3-dibromo-1-(4-ethylphenyl)prop-2-en-1-one (2e)**<sup>3</sup>: Following the general conditions **1** and **2**, purification by flash chromatography (petroleum/EtOAc = 50:1), yellow oil (**1**: 88%, 111.2 mg; **2**: 84%, 106.1 mg); <sup>1</sup>H NMR (400 MHz, CDCl<sub>3</sub>): δ 7.87 (d, *J* = 8.0 Hz, 2H), 7.81 (s, 1H), 7.32 (d, *J* = 8.0 Hz, 2H), 2.72 (q, *J* = 7.6 Hz, 2H), 1.27 (t, *J* = 7.6 Hz, 3H), ppm; <sup>13</sup>C NMR (100 MHz, CDCl<sub>3</sub>): δ 186.5, 150.1, 133.1, 131.9, 128.0, 127.4, 101.5, 28.0, 14.1.

**3,3-dibromo-1-(4-(tert-butyl)phenyl)prop-2-en-1-one (2f)**<sup>4</sup>: Following the general conditions **1** and **2**, purification by flash chromatography (petroleum/EtOAc = 30:1), yellow oil (**1**: 87%, 119.6 mg; **2**: 75%, 103.1 mg); <sup>1</sup>H NMR (400 MHz, CDCl<sub>3</sub>): δ 7.88 (d, *J* = 8.4 Hz, 2H), 7.83 (s, 1H), 7.51 (d, *J* = 8.4 Hz, 2H), 1.35 (s, 9H), ppm; <sup>13</sup>C NMR (100 MHz, CDCl<sub>3</sub>): δ 187.4, 157.9, 133.8, 132.9, 128.7, 125.9, 102.6, 35.3, 31.1; HRMS (ESI-TOF) *m/z* calcd for C<sub>13</sub>H<sub>14</sub>Br<sub>2</sub>O [M + H]<sup>+</sup> 344.9484, found 344.9492.

**3,3-dibromo-1-(4-pentylphenyl)prop-2-en-1-one (2g)**: Following the general conditions **1** and **2**, purification by flash chromatography (petroleum/EtOAc = 30:1), yellow oil (**1**: 81%, 115.9 mg; **2**: 77%, 110.2 mg); <sup>1</sup>H NMR (400 MHz, CDCl<sub>3</sub>): δ 7.85 (d, *J* = 8.4 Hz, 2H), 7.82 (s, 1H), 7.29 (d, *J* = 8.0 Hz, 2H), 2.69–2.65 (m, 2H), 1.67–1.59 (m, 2H), 1.37–1.29 (m, 4H), 0.89 (t, *J* = 6.4 Hz, 3H), ppm; <sup>13</sup>C NMR (100 MHz, CDCl<sub>3</sub>): δ 187.5, 149.9, 134.1, 132.9, 129.0, 128.9, 102.5, 36.1, 31.4, 30.7, 22.5, 14.0; HRMS (ESI-TOF) *m/z* calcd for C<sub>14</sub>H<sub>16</sub>Br<sub>2</sub>O [M + H]<sup>+</sup> 358.9641, found 358.9647.

**3,3-dibromo-1-(4-ethoxyphenyl)prop-2-en-1-one (2h)**<sup>3</sup>: Following the general conditions **1** and **2**, purification by flash chromatography (petroleum/EtOAc = 50:1), yellow oil (**1**: 59%, 78.3 mg; **2**: 0%, 0 mg); <sup>1</sup>H NMR (400 MHz, CDCl<sub>3</sub>): δ 7.91 (d, *J* = 8.8 Hz, 2H), 7.76 (s, 1H), 6.94 (d, *J* = 8.4 Hz, 2H), 4.11 (q, *J* = 6.8 Hz, 2H), 1.44 (t, *J* = 6.8 Hz, 3H), ppm; <sup>13</sup>C NMR (100 MHz, CDCl<sub>3</sub>): δ 186.6, 163.7, 133.2, 131.2, 129.0, 114.6, 101.5, 63.9, 14.7.

**3,3-dibromo-1-(4-methoxyphenyl)prop-2-en-1-one (2i)**<sup>3</sup>: Following the general conditions **1** and **2**, purification by flash chromatography (petroleum/EtOAc = 50:1), yellow oil (**1**: 69%, 87.7 mg; **2**: trace, 0 mg); <sup>1</sup>H NMR (400 MHz, CDCl<sub>3</sub>): δ 7.92 (d, *J* = 9.2 Hz, 2H), 7.76 (s, 1H), 6.96 (d, *J* = 8.8 Hz, 2H), 3.88 (s, 3H), ppm; <sup>13</sup>C NMR (100 MHz, CDCl<sub>3</sub>): δ 186.6, 164.2, 133.14, 131.2, 129.2, 114.2, 101.6, 55.6.

**2-(4-(3,3-dibromoacryloyl)phenyl)acetonitrile (2j)**: Following the general conditions **1** and **2**, purification by flash chromatography (petroleum/EtOAc = 30:1), white solid (**1**: 51%, 66.6 mg; **2**: 45%, 58.8 mg); M.P. = 108.2–108.9 °C. <sup>1</sup>H NMR (400 MHz, CDCl<sub>3</sub>): δ 7.95 (d, *J* = 8.4 Hz, 2H), 7.83 (s, 1H), 7.48 (d, *J* = 8.0 Hz, 2H), 3.84 (s, 2H), ppm; <sup>13</sup>C NMR (100 MHz, CDCl<sub>3</sub>): δ 186.9, 136.3, 135.8, 132.1, 129.5, 128.5, 116.9, 104.3, 23.8; HRMS (ESI-TOF) *m/z* calcd for C<sub>11</sub>H<sub>7</sub>Br<sub>2</sub>NO [M + H]<sup>+</sup> 327.8967, found 327.8972.

**3,3-dibromo-1-(4-fluorophenyl)prop-2-en-1-one (2k)**<sup>3</sup>: Following the general conditions **1** and **2**, purification by flash chromatography (petroleum/EtOAc = 50:1), colorless oil (**1**: 81%, 99.1 mg; **2**: 86%, 105.2 mg); <sup>1</sup>H NMR (400 MHz, CDCl<sub>3</sub>): δ 7.97 (dd, *J* = 8.0, 5.2 Hz, 2H), 7.79 (s, 1H), 7.17 (t, *J* = 8.8 Hz, 2H), ppm; <sup>13</sup>C NMR (100 MHz, CDCl<sub>3</sub>): δ 185.3, 165.2 (d, *J* = 255 Hz, C-F), 131.7 (d, *J* = 3.0 Hz, C-F), 131.3, 130.4 (d, *J* = 9.0 Hz, C-F), 115.1 (d, *J* = 22 Hz, C-F), 102.5; <sup>19</sup>F NMR (376 MHz, CDCl<sub>3</sub>): δ -103.3.

**3,3-dibromo-1-(4-chlorophenyl)prop-2-en-1-one (2l)**<sup>3</sup>: Following the general conditions **1** and **2**, purification by flash chromatography (petroleum/EtOAc = 50:1), white solid (**1**: 64%, 82.3 mg; **2**: 71%, 91.4 mg); M.P. = 67.2–68.5 °C. <sup>1</sup>H NMR (400 MHz, CDCl<sub>3</sub>): δ 7.88 (d, *J* = 8.4 Hz, 2H), 7.80 (s, 1H), 7.47 (d, *J* = 8.4 Hz, 2H), ppm; <sup>13</sup>C NMR (100 MHz, CDCl<sub>3</sub>): δ 186.6, 140.5, 134.7, 132.1, 130.1, 129.3, 104.1.

**3,3-dibromo-1-(4-bromophenyl)prop-2-en-1-one (2m)**<sup>3</sup>: Following the general conditions **1** and **2**, purification by flash chromatography (petroleum/EtOAc = 30:1), yellow solid (**1**: 35%, 51.2 mg; **2**: 55%, 80.4 mg); M.P. = 89.2–90.1 °C. <sup>1</sup>H NMR (400 MHz, CDCl<sub>3</sub>): δ 7.81–7.79 (m, 3H), 7.64 (d, *J* = 8.4 Hz, 2H), ppm; <sup>13</sup>C NMR (100 MHz, CDCl<sub>3</sub>): δ 185.7, 134.1, 131.2, 131.0, 129.1, 128.2, 103.2.

**3,3-dibromo-1-(3-fluorophenyl)prop-2-en-1-one (2n)**: Following the general conditions **1** and **2**, purification by flash chromatography (petroleum/EtOAc = 50:1), colorless oil (**1**: 82%, 100.3 mg; **2**: 84%, 102.7 mg); <sup>1</sup>H NMR (400 MHz, CDCl<sub>3</sub>): δ 7.82 (s, 1H), 7.71 (d, *J* = 7.6 Hz, 1H), 7.62 (d, *J* = 9.2 Hz, 1H), 7.48 (dd, *J* = 13.6, 8.0 Hz, 1H), 7.33–7.28 (m, 1H), ppm; <sup>13</sup>C NMR (100 MHz, CDCl<sub>3</sub>): δ 186.5, 163.1 (d, *J* = 147 Hz, C-F), 138.7 (d, *J* = 6.0 Hz, C-F), 132.1, 130.7 (d, *J* = 8.0 Hz, C-F), 124.5 (d, *J* = 3.0 Hz, C-F), 121.3 (d, *J* = 22 Hz, C-F), 115.5 (d, *J* = 23 Hz, C-F), 104.9; <sup>19</sup>F NMR (376 MHz, CDCl<sub>3</sub>): δ -111.0; HRMS (ESI-TOF) *m/z* calcd for C<sub>9</sub>H<sub>5</sub>Br<sub>2</sub>FO [M + H]<sup>+</sup> 306.8764, found 306.8769.

**3,3-dibromo-1-(3-chlorophenyl)prop-2-en-1-one (2o)**<sup>4</sup>: Following the general conditions **1** and **2**, purification by flash chromatography (petroleum/EtOAc = 50:1), yellow oil (**1**: 55%, 70.8 mg; **2**: 69%, 88.8 mg); <sup>1</sup>H NMR (400 MHz, CDCl<sub>3</sub>): δ 7.90 (d, *J* = 1.2 Hz, 1H), 7.81–7.80 (m, 2H), 7.58 (d, *J* = 7.6 Hz, 1H), 7.45 (t, *J* = 6.4 Hz, 1H), ppm; <sup>13</sup>C NMR (100 MHz, CDCl<sub>3</sub>): δ 186.4, 138.0, 135.3, 133.7, 131.9, 130.2, 128.6, 126.7, 104.9; HRMS (ESI-TOF) *m/z* calcd for C<sub>9</sub>H<sub>5</sub>Br<sub>2</sub>ClO [M + H]<sup>+</sup> 322.8468, found 322.8470.

**3,3-dibromo-1-(4-(trifluoromethyl)phenyl)prop-2-en-1-one (2p)**<sup>3</sup>: Following the general conditions **1** and **2**, purification by flash chromatography (petroleum/EtOAc = 30:1), yellow white (**1**: 52%, 74.0 mg; **2**: 61%, 86.8 mg); M.P. = 59.2–59.6 °C. <sup>1</sup>H NMR (400 MHz, CDCl<sub>3</sub>): δ 8.04 (d, *J* = 8.0 Hz, 2H), 7.86 (s, 1H), 7.77 (d, *J* = 8.0 Hz, 2H), 7.45 (t, *J* = 6.4 Hz, 1H), ppm; <sup>13</sup>C NMR (100

MHz, CDCl<sub>3</sub>):  $\delta$  186.6, 139.2, 134.9 (d,  $J$  = 33 Hz, C-F), 131.7, 128.9, 131.9, 125.9 (q,  $J$  = 3.7 Hz, C-F), 105.5; <sup>19</sup>F NMR (376 MHz, CDCl<sub>3</sub>):  $\delta$  -63.2.

**4-(3,3-dibromoacryloyl)benzaldehyde (2q)**: Following the general conditions **1** and **2**, purification by flash chromatography (petroleum/EtOAc = 20:1), yellow solid (**1**: 22%, 27.7 mg; **2**: 14%, 17.6 mg); M.P. = 93.6–94.1 °C. <sup>1</sup>H NMR (400 MHz, CDCl<sub>3</sub>):  $\delta$  10.1 (s, 1H), 8.04 (dd,  $J$  = 28.4, 8.0 Hz, 4H), 7.88 (s, 1H), ppm; <sup>13</sup>C NMR (100 MHz, CDCl<sub>3</sub>):  $\delta$  191.4, 186.9, 140.8, 139.4, 131.8, 130.0, 129.1, 15.7; HRMS (ESI-TOF)  $m/z$  calcd for C<sub>10</sub>H<sub>6</sub>Br<sub>2</sub>O<sub>2</sub> [M + H]<sup>+</sup> 316.8807, found 316.8811.

**1-(4-acetylphenyl)-3,3-dibromoprop-2-en-1-one (2r)**: Following the general conditions **1** and **2**, purification by flash chromatography (petroleum/EtOAc = 15:1), yellow solid (**1**: 47%, 62.0 mg; **2**: 38%, 50.1 mg); M.P. = 60.8–61.5 °C. <sup>1</sup>H NMR (400 MHz, CDCl<sub>3</sub>):  $\delta$  8.03 (dd,  $J$  = 20, 8.4 Hz, 4H), 7.87 (s, 1H), 2.65 (s, 3H), ppm; <sup>13</sup>C NMR (100 MHz, CDCl<sub>3</sub>):  $\delta$  197.3, 187.0, 140.6, 139.7, 131.9, 128.8, 128.7, 105.2, 26.9; HRMS (ESI-TOF)  $m/z$  calcd for C<sub>11</sub>H<sub>8</sub>Br<sub>2</sub>O<sub>2</sub> [M + H]<sup>+</sup> 330.8964, found 330.8969.

**1-([1,1'-biphenyl]-4-yl)-3,3-dibromoprop-2-en-1-one (2s)**<sup>3</sup>: Following the general conditions **1** and **2**, purification by flash chromatography (petroleum/EtOAc = 20:1), white solid (**1**: 52%, 75.6 mg; **2**: 47%, 68.4 mg); M.P. = 107.0–107.8 °C. <sup>1</sup>H NMR (400 MHz, CDCl<sub>3</sub>):  $\delta$  8.02 (d,  $J$  = 8.4 Hz, 2H), 7.88 (s, 1H), 7.72 (d,  $J$  = 8.4 Hz, 2H), 7.67–7.63 (m, 2H), 7.50–7.40 (m, 3H), ppm; <sup>13</sup>C NMR (100 MHz, CDCl<sub>3</sub>):  $\delta$  187.3, 146.6, 139.6, 135.1, 132.7, 129.3, 129.1, 128.5, 127.5, 127.3, 103.2.

**methyl 4-(3,3-dibromoacryloyl)benzoate (2t)**<sup>3</sup>: Following the general conditions **1** and **2**, purification by flash chromatography (petroleum/EtOAc = 20:1), light yellow solid (**1**: 33%, 45.6 mg; **2**: 25%, 34.5 mg); M.P. = 92.6–92.8 °C. <sup>1</sup>H NMR (400 MHz, CDCl<sub>3</sub>):  $\delta$  8.15 (d,  $J$  = 8.0 Hz, 2H), 7.99 (d,  $J$  = 8.4 Hz, 2H), 7.87 (s, 1H), 3.96 (s, 3H), ppm; <sup>13</sup>C NMR (100 MHz, CDCl<sub>3</sub>):  $\delta$  187.1, 166.0, 139.8, 134.5, 132.0, 130.1, 128.5, 105.1, 52.6.

**3,3-dibromo-1-(naphthalen-1-yl)prop-2-en-1-one (2v)**: Following the general conditions **1** and **2**, purification by flash chromatography (petroleum/EtOAc = 50:1), colorless oil (**1**: 79%, 106.7 mg; **2**: 70%, 94.6 mg); <sup>1</sup>H NMR (400 MHz, CDCl<sub>3</sub>):  $\delta$  8.68 (d,  $J$  = 8.4 Hz, 1H), 8.05 (d,  $J$  = 8.4 Hz, 1H), 7.91 (d,  $J$  = 7.6 Hz, 2H), 7.79 (s, 1H), 7.64 (t,  $J$  = 7.2 Hz, 1H), 7.58–7.52 (m, 2H), ppm; <sup>13</sup>C NMR (100 MHz, CDCl<sub>3</sub>):  $\delta$  190.6, 135.6, 134.3, 134.0, 133.9, 130.4, 129.6, 128.6, 128.5, 126.8, 125.5, 124.5, 103.2; HRMS (ESI-TOF)  $m/z$  calcd for C<sub>13</sub>H<sub>8</sub>Br<sub>2</sub>O [M + H]<sup>+</sup> 338.9015, found 338.9016.

**3,3-dibromo-1-(thiophen-2-yl)prop-2-en-1-one (2w)**<sup>3</sup>: Following the general conditions **1** and **2**, purification by flash chromatography (petroleum/EtOAc = 20:1), white solid (**1**: 41%, 48.1 mg; **2**: 35%, 41.1 mg); M.P. = 85.2–85.8 °C. <sup>1</sup>H NMR (400 MHz, CDCl<sub>3</sub>):  $\delta$  7.82 (s, 1H), 7.74–7.71 (m, 2H), 7.18–7.15 (m, 1H), ppm; <sup>13</sup>C NMR (100 MHz, CDCl<sub>3</sub>):  $\delta$  178.3, 143.2, 134.2, 131.5, 130.2, 127.4, 103.8.

**3,3-dibromo-1-(thiophen-3-yl)prop-2-en-1-one (2x)**<sup>3</sup>: Following the general conditions **1** and **2**, purification by flash chromatography (petroleum/EtOAc = 20:1), white solid (**1**: 55%, 64.6 mg; **2**: 38%, 44.6 mg); M.P. = 92.6–92.9 °C. <sup>1</sup>H NMR (400 MHz, CDCl<sub>3</sub>):  $\delta$  8.09–8.08 (m, 1H), 7.80 (s, 1H), 7.57 (d,  $J$  = 5.2 Hz, 1H), 7.36 (dd,  $J$  = 5.2, 2.8 Hz, 1H), ppm; <sup>13</sup>C NMR (100 MHz, CDCl<sub>3</sub>):  $\delta$  180.9, 141.9, 133.2, 132.4, 127.1, 127.0, 104.1.

**1,1-dibromohept-1-en-3-one (2aa)**<sup>4</sup>: Following the general conditions **1** and **2**, purification by flash chromatography (petroleum/EtOAc = 20:1), colorless oil (**1**: 17%, 18.2 mg; **2**: 32%, 34.2 mg); <sup>1</sup>H NMR (400 MHz, CDCl<sub>3</sub>):  $\delta$  7.29 (s, 1H), 2.50 (t,  $J$  = 7.6 Hz, 2H), 1.61 (dd,  $J$  = 14.8, 7.2 Hz, 2H), 1.38–1.29 (m, 2H), 0.92 (t,  $J$  = 7.6 Hz, 3H), ppm; <sup>13</sup>C NMR (100 MHz, CDCl<sub>3</sub>):  $\delta$  196.6, 134.1, 103.3, 43.9, 25.7, 22.2, 13.8; HRMS (ESI-TOF)  $m/z$  calcd for C<sub>7</sub>H<sub>10</sub>Br<sub>2</sub>O [M + Na]<sup>+</sup> 290.8991, found

290.9001.

**3,3-dibromo-2-methyl-1-phenylprop-2-en-1-one (2ab):** Following the general conditions **1** and **2**, purification by flash chromatography (petroleum/EtOAc = 50:1), colorless oil (**1**: 68%, 82.1 mg; **2**: 57%, 68.8 mg); <sup>1</sup>H NMR (400 MHz, CDCl<sub>3</sub>): δ 7.93 (d, *J* = 7.2 Hz, 2H), 7.64 (t, *J* = 7.6 Hz, 1H), 7.52 (t, *J* = 7.6 Hz, 2H), 2.09 (s, 3H), ppm; <sup>13</sup>C NMR (100 MHz, CDCl<sub>3</sub>): δ 195.0, 142.4, 134.3, 133.6, 129.6, 129.1, 88.7, 22.3; HRMS (ESI-TOF) *m/z* calcd for C<sub>10</sub>H<sub>8</sub>Br<sub>2</sub>O [M + H]<sup>+</sup> 302.9015, found 302.9020.

**2-(dibromomethylene)-1-phenylbutan-1-one (2ac):** Following the general conditions **1** and **2**, purification by flash chromatography (petroleum/EtOAc = 50:1), colorless oil (**1**: 56%, 70.7 mg; **2**: 44%, 55.6 mg); <sup>1</sup>H NMR (400 MHz, CDCl<sub>3</sub>): δ 7.87 (d, *J* = 8.0 Hz, 2H), 7.56 (t, *J* = 7.6 Hz, 1H), 7.44 (t, *J* = 7.6 Hz, 2H), 2.46 (q, *J* = 7.6 Hz, 2H), 1.01 (t, *J* = 7.6 Hz, 3H), ppm; <sup>13</sup>C NMR (100 MHz, CDCl<sub>3</sub>): δ 194.8, 147.6, 134.3, 134.2, 129.6, 129.0, 88.2, 30.1, 11.4; HRMS (ESI-TOF) *m/z* calcd for C<sub>11</sub>H<sub>10</sub>Br<sub>2</sub>O [M + H]<sup>+</sup> 316.9171, found 316.9167.

**3,3-dibromo-1,2-diphenylprop-2-en-1-one (2ad):** Following the general conditions **1** and **2**, purification by flash chromatography (petroleum/EtOAc = 50:1), colorless oil (**1**: 15%, 21.8 mg; **2**: 8%, 11.6 mg); <sup>1</sup>H NMR (400 MHz, CDCl<sub>3</sub>): δ 8.05 (d, *J* = 7.6 Hz, 2H), 7.61 (t, *J* = 7.2 Hz, 1H), 7.52–7.48 (m, 4H), 7.39–7.33 (m, 3H), ppm; <sup>13</sup>C NMR (100 MHz, CDCl<sub>3</sub>): δ 192.8, 146.7, 135.6, 134.9, 134.3, 134.0, 130.0, 129.1, 128.8, 128.2, 90.9; HRMS (ESI-TOF) *m/z* calcd for C<sub>15</sub>H<sub>10</sub>Br<sub>2</sub>O [M + H]<sup>+</sup> 364.9171, found 364.9176.

**3,3-dichloro-1-phenylprop-2-en-1-one (3a)<sup>4</sup>:** Following the general conditions **1** and **2**, purification by flash chromatography (petroleum/EtOAc = 50:1), yellow oil (**1**: 77%, 61.5 mg; **2**: 78%, 62.3 mg); <sup>1</sup>H NMR (400 MHz, CDCl<sub>3</sub>): δ 7.93 (d, *J* = 8.0 Hz, 2H), 7.61 (t, *J* = 6.8 Hz, 1H), 7.50 (t, *J* = 7.6 Hz, 2H), 7.27 (s, 2H), ppm; <sup>13</sup>C NMR (100 MHz, CDCl<sub>3</sub>): δ 186.7, 137.0, 135.6, 133.7, 128.9, 128.5, 124.1; HRMS (ESI-TOF) *m/z* calcd for C<sub>9</sub>H<sub>6</sub>Cl<sub>2</sub>O [M + H]<sup>+</sup> 200.9868, found 200.9874.

**1-(4-(tert-butyl)phenyl)-3,3-dichloroprop-2-en-1-one (3b)<sup>4</sup>:** Following the general conditions **1** and **2**, purification by flash chromatography (petroleum/EtOAc = 50:1), yellow oil (**1**: 85%, 87.0 mg; **2**: 72%, 73.7 mg); <sup>1</sup>H NMR (400 MHz, CDCl<sub>3</sub>): δ 7.87 (d, *J* = 8.4 Hz, 2H), 7.50 (d, *J* = 8.4 Hz, 2H), 7.26 (s, 1H), 1.35 (s, 9H), ppm; <sup>13</sup>C NMR (100 MHz, CDCl<sub>3</sub>): δ 186.3, 157.7, 134.9, 134.3, 128.5, 125.8, 124.3, 35.3, 31.1; HRMS (ESI-TOF) *m/z* calcd for C<sub>13</sub>H<sub>14</sub>Cl<sub>2</sub>O [M + H]<sup>+</sup> 257.0494, found 257.0495.

**3,3-dichloro-1-(4-pentylphenyl)prop-2-en-1-one (3c):** Following the general conditions **1** and **2**, purification by flash chromatography (petroleum/EtOAc = 50:1), yellow oil (**1**: 80%, 86.4 mg; **2**: 65%, 70.2 mg); <sup>1</sup>H NMR (400 MHz, CDCl<sub>3</sub>): δ 7.84 (d, *J* = 8.0 Hz, 2H), 7.29 (d, *J* = 8.0 Hz, 2H), 7.25 (s, 1H), 2.67 (t, *J* = 7.6 Hz, 2H), 1.67–1.59 (m, 2H), 1.36–1.32 (m, 4H), 0.89 (t, *J* = 6.0 Hz, 3H), ppm; <sup>13</sup>C NMR (100 MHz, CDCl<sub>3</sub>): δ 186.4, 149.7, 134.8, 134.6, 128.9, 128.7, 124.3, 36.0, 31.4, 30.7, 22.5, 13.9; HRMS (ESI-TOF) *m/z* calcd for C<sub>14</sub>H<sub>16</sub>Cl<sub>2</sub>O [M + H]<sup>+</sup> 271.0651, found 271.0655.

**3,3-dichloro-1-(4-ethylphenyl)prop-2-en-1-one (3d)<sup>4</sup>:** Following the general conditions **1** and **2**, purification by flash chromatography (petroleum/EtOAc = 50:1), yellow oil (**1**: 83%, 75.6 mg; **2**: 71%, 64.7 mg); <sup>1</sup>H NMR (400 MHz, CDCl<sub>3</sub>): δ 7.85 (d, *J* = 8.0 Hz, 2H), 7.31 (d, *J* = 8.0 Hz, 2H), 7.25 (s, 1H), 2.72 (q, *J* = 7.6 Hz, 2H), 1.27 (t, *J* = 7.6 Hz, 3H), ppm; <sup>13</sup>C NMR (100 MHz, CDCl<sub>3</sub>): δ 186.4, 150.9, 134.9, 134.6, 128.8, 128.4, 124.3, 29.0, 15.1; HRMS (ESI-TOF) *m/z* calcd for C<sub>11</sub>H<sub>10</sub>Cl<sub>2</sub>O [M + H]<sup>+</sup> 229.0181, found 229.0188.

**3,3-dichloro-1-(4-methoxyphenyl)prop-2-en-1-one (3e)<sup>4</sup>:** Following the general conditions **1** and

**2**, purification by flash chromatography (petroleum/EtOAc = 50:1), yellow oil (**1**: 72%, 66.2 mg; **2**: <5%, 0 mg); <sup>1</sup>H NMR (400 MHz, CDCl<sub>3</sub>): δ 7.91 (d, *J* = 8.8 Hz, 2H), 7.20 (s, 1H), 7.36 (d, *J* = 8.8 Hz, 2H), 3.88 (s, 3H), ppm; <sup>13</sup>C NMR (100 MHz, CDCl<sub>3</sub>): δ 185.4, 164.1, 134.1, 131.0, 129.8, 124.4, 114.1, 55.6; HRMS (ESI-TOF) *m/z* calcd for C<sub>10</sub>H<sub>8</sub>Cl<sub>2</sub>O<sub>2</sub> [M + H]<sup>+</sup> 230.9974, found 230.9979.

**3,3-dichloro-1-(m-tolyl)prop-2-en-1-one (3f)**: Following the general conditions **1** and **2**, purification by flash chromatography (petroleum/EtOAc = 50:1), yellow oil (**1**: 65%, 55.6 mg; **2**: 58%, 49.6 mg); <sup>1</sup>H NMR (400 MHz, CDCl<sub>3</sub>): δ 7.73–7.73 (m, 2H), 7.43–7.36 (m, 2H), 7.25 (s, 1H), 2.43 (s, 3H), ppm; <sup>13</sup>C NMR (100 MHz, CDCl<sub>3</sub>): δ 186.9, 138.8, 136.9, 135.2, 134.5, 129.0, 128.7, 125.8, 124.3, 21.4; HRMS (ESI-TOF) *m/z* calcd for C<sub>10</sub>H<sub>8</sub>Cl<sub>2</sub>O [M + H]<sup>+</sup> 215.0025, found 215.0027.

**3,3-dichloro-1-(4-fluorophenyl)prop-2-en-1-one (3g)**<sup>4</sup>: Following the general conditions **1** and **2**, purification by flash chromatography (petroleum/EtOAc = 50:1), yellow oil (**1**: 76%, 66.2 mg; **2**: 69%, 60.1 mg); <sup>1</sup>H NMR (400 MHz, CDCl<sub>3</sub>): δ 7.96–7.94 (m, 2H), 7.22 (s, 1H), 7.17 (t, *J* = 8.4 Hz, 2H), ppm; <sup>13</sup>C NMR (100 MHz, CDCl<sub>3</sub>): δ 185.2, 166.1 (d, *J* = 255 Hz, C-F), 135.7, 133.3 (d, *J* = 3.0 Hz, C-F), 131.2 (d, *J* = 9.0 Hz, C-F), 123.8, 116.1 (d, *J* = 22 Hz, C-F); <sup>19</sup>F NMR (376 MHz, CDCl<sub>3</sub>): δ -103.6; HRMS (ESI-TOF) *m/z* calcd for C<sub>9</sub>H<sub>5</sub>Cl<sub>2</sub>FO [M + H]<sup>+</sup> 218.9774, found 218.9770.

**3,3-dichloro-1-(4-chlorophenyl)prop-2-en-1-one (3h)**<sup>4</sup>: Following the general conditions **1** and **2**, purification by flash chromatography (petroleum/EtOAc = 30:1), white solid (**1**: 71%, 66.4 mg; **2**: 76%, 71.1 mg); M.P. = 43.2–43.6 °C. <sup>1</sup>H NMR (400 MHz, CDCl<sub>3</sub>): δ 7.86 (d, *J* = 8.8 Hz, 2H), 7.47 (d, *J* = 8.8 Hz, 2H), 7.22 (s, 1H), ppm; <sup>13</sup>C NMR (100 MHz, CDCl<sub>3</sub>): δ 185.4, 140.3, 136.3, 135.3, 129.9, 129.2, 123.6; HRMS (ESI-TOF) *m/z* calcd for C<sub>9</sub>H<sub>5</sub>Cl<sub>3</sub>O [M + H]<sup>+</sup> 234.9479, found 234.9483.

**1-(4-bromophenyl)-3,3-dichloroprop-2-en-1-one (3i)**: Following the general conditions **1** and **2**, purification by flash chromatography (petroleum/EtOAc = 30:1), white solid (**1**: 75%, 83.3 mg; **2**: 70%, 77.8 mg); M.P. = 67.4–68.0 °C. <sup>1</sup>H NMR (400 MHz, CDCl<sub>3</sub>): δ 7.79 (d, *J* = 8.4 Hz, 2H), 7.64 (d, *J* = 8.8 Hz, 2H), 7.22 (s, 1H), ppm; <sup>13</sup>C NMR (100 MHz, CDCl<sub>3</sub>): δ 185.6, 136.4, 135.7, 132.2, 129.9, 129.1, 123.5; HRMS (ESI-TOF) *m/z* calcd for C<sub>9</sub>H<sub>5</sub>BrCl<sub>2</sub>O [M + H]<sup>+</sup> 278.8974, found 278.8965.

**3,3-dichloro-1-(4-(trifluoromethyl)phenyl)prop-2-en-1-one (3j)**: Following the general conditions **1** and **2**, purification by flash chromatography (petroleum/EtOAc = 30:1), semi-solid (**1**: 55%, 58.9 mg; **2**: 27%, 28.9 mg); <sup>1</sup>H NMR (400 MHz, CDCl<sub>3</sub>): δ 8.02 (d, *J* = 8.4 Hz, 2H), 7.76 (d, *J* = 8.0 Hz, 2H), 7.27 (s, 1H), ppm; <sup>13</sup>C NMR (100 MHz, CDCl<sub>3</sub>): δ 185.6, 139.7, 137.4, 134.9 (d, *J* = 33 Hz, C-F), 128.7, 125.9 (q, *J* = 4.0 Hz, C-F), 123.3, 122.1; <sup>19</sup>F NMR (376 MHz, CDCl<sub>3</sub>): δ -63.2; HRMS (ESI-TOF) *m/z* calcd for C<sub>10</sub>H<sub>5</sub>Cl<sub>2</sub>F<sub>3</sub>O [M + H]<sup>+</sup> 268.9742, found 268.9750.

**1-([1,1'-biphenyl]-4-yl)-3,3-dichloroprop-2-en-1-one (3k)**<sup>4</sup>: Following the general conditions **1** and **2**, purification by flash chromatography (petroleum/EtOAc = 20:1), white solid (**1**: 54%, 59.6 mg; **2**: 60%, 66.2 mg); M.P. = 91.3–91.8 °C. <sup>1</sup>H NMR (400 MHz, CDCl<sub>3</sub>): δ 8.00 (d, *J* = 7.6 Hz, 2H), 7.72 (d, *J* = 7.6 Hz, 2H), 7.64 (d, *J* = 8.0 Hz, 2H), 7.49 (t, *J* = 8.0 Hz, 2H), 7.44–7.40 (m, 1H), 7.31 (s, 1H), ppm; <sup>13</sup>C NMR (100 MHz, CDCl<sub>3</sub>): δ 186.2, 146.5, 139.6, 135.6, 135.4, 129.2, 129.0, 128.5, 127.5, 127.3, 124.1; HRMS (ESI-TOF) *m/z* calcd for C<sub>15</sub>H<sub>10</sub>Cl<sub>2</sub>O [M + H]<sup>+</sup> 277.0181, found 277.0186.

**methyl 4-(3,3-dichloroacryloyl)benzoate (3l)**<sup>4</sup>: Following the general conditions **1** and **2**, purification by flash chromatography (petroleum/EtOAc = 20:1), white solid (**1**: 35%, 36.1 mg; **2**: 26%, 26.8 mg); M.P. = 87.3–88.2 °C. <sup>1</sup>H NMR (400 MHz, CDCl<sub>3</sub>): δ 8.08 (d, *J* = 8.4 Hz, 2H), 7.47 (d, *J* = 8.4 Hz, 2H), 7.22 (s, 1H), 3.89 (s, 3H), ppm; <sup>13</sup>C NMR (100 MHz, CDCl<sub>3</sub>): δ 186.0, 166.2, 140.3, 137.0, 134.4, 130.1, 128.4, 123.6, 52.6; HRMS (ESI-TOF) *m/z* calcd for C<sub>11</sub>H<sub>8</sub>Cl<sub>2</sub>O<sub>3</sub> [M + H]<sup>+</sup> 258.9923, found 258.9931.

**3,3-dichloro-1-(thiophen-3-yl)prop-2-en-1-one (3m):** Following the general conditions **1** and **2**, purification by flash chromatography (petroleum/EtOAc = 20:1), grey solid (**1**: 65%, 53.5 mg; **2**: 23%, 18.9 mg); M.P. = 62.3–62.8 °C. <sup>1</sup>H NMR (400 MHz, CDCl<sub>3</sub>): δ 8.06 (d, *J* = 1.6 Hz, 1H), 7.57–7.56 (m, 2H), 7.36 (dd, *J* = 5.2, 3.2 Hz, 1H), 7.20 (s, 1H), ppm; <sup>13</sup>C NMR (100 MHz, CDCl<sub>3</sub>): δ 178.9, 141.3, 134.9, 131.9, 126.0, 125.9, 123.1; HRMS (ESI-TOF) *m/z* calcd for C<sub>7</sub>H<sub>4</sub>Cl<sub>2</sub>OS [M + H]<sup>+</sup> 206.9433, found 206.9432.

**3,3-dichloro-1-(naphthalen-1-yl)prop-2-en-1-one (3n):** Following the general conditions **1** and **2**, purification by flash chromatography (petroleum/EtOAc = 50:1), colorless oil (**1**: 70%, 69.9 mg; **2**: 59%, 58.9 mg); <sup>1</sup>H NMR (400 MHz, CDCl<sub>3</sub>): δ 8.62 (d, *J* = 8.4 Hz, 1H), 8.03 (d, *J* = 8.0 Hz, 1H), 7.88 (dd, *J* = 17.6, 8.0 Hz, 2H), 7.63 (t, *J* = 8.0 Hz, 1H), 7.57–7.20 (m, 2H), 7.19 (s, 1H), ppm; <sup>13</sup>C NMR (100 MHz, CDCl<sub>3</sub>): δ 189.7, 135.3, 135.1, 133.9, 133.6, 130.3, 129.1, 128.6, 128.3, 127.3, 126.8, 125.4, 124.5; HRMS (ESI-TOF) *m/z* calcd for C<sub>13</sub>H<sub>8</sub>Cl<sub>2</sub>O [M + H]<sup>+</sup> 251.0025, found 251.0029.

**1,1-dichlorooct-1-en-3-one (3o):** Following the general conditions **1** and **2**, purification by flash chromatography (petroleum/EtOAc = 100:1), colorless oil (**1**: 28%, 20.1 mg; **2**: 15%, 10.8 mg); <sup>1</sup>H NMR (400 MHz, CDCl<sub>3</sub>): δ 6.65 (d, *J* = 0.8 Hz, 1H), 2.53 (t, *J* = 8.0 Hz, 2H), 1.63–1.58 (m, 2H), 1.31–1.29 (m, 4H), 0.89 (t, *J* = 6.0 Hz, 3H), ppm; <sup>13</sup>C NMR (100 MHz, CDCl<sub>3</sub>): δ 194.9, 133.1, 125.4, 76.3, 75.9, 75.7, 43.2, 30.2, 22.4, 21.4, 12.9. HRMS (ESI-TOF) *m/z* calcd for C<sub>8</sub>H<sub>12</sub>Cl<sub>2</sub>O [M + H]<sup>+</sup> 195.0338, found 195.0350.

**3,3-dichloro-2-methyl-1-phenylprop-2-en-1-one (3p)<sup>4</sup>:** Following the general conditions **1** and **2**, purification by flash chromatography (petroleum/EtOAc = 50:1), colorless oil (**1**: 53%, 45.3 mg; **2**: 58%, 49.6 mg); <sup>1</sup>H NMR (400 MHz, CDCl<sub>3</sub>): δ 7.92–7.89 (m, 2H), 7.65–7.61 (m, 1H), 7.53–7.49 (m, 2H), 2.12 (s, 3H), ppm; <sup>13</sup>C NMR (100 MHz, CDCl<sub>3</sub>): δ 194.4, 135.1, 134.3, 134.2, 129.5, 129.0, 120.0, 19.1; HRMS (ESI-TOF) *m/z* calcd for C<sub>10</sub>H<sub>8</sub>Cl<sub>2</sub>O [M + H]<sup>+</sup> 215.0025, found 215.0029.

**(Z)-(1,3,3,3-tetrabromoprop-1-en-1-yl)benzene (5):** Purification by flash chromatography (petroleum), colorless oil (42%, 72.2 mg); <sup>1</sup>H NMR (400 MHz, CDCl<sub>3</sub>): δ 7.52–7.50 (m, 2H), 7.41–7.35 (m, 3H), 6.80 (s, 1H), ppm; <sup>13</sup>C NMR (100 MHz, CDCl<sub>3</sub>): δ 137.1, 129.4, 129.2, 128.3, 121.4, 103.0; HRMS (ESI-TOF) *m/z* calcd for C<sub>9</sub>H<sub>6</sub>Br<sub>4</sub> [M + Na]<sup>+</sup> 452.7095, found 452.7106.

**(E)-(1,3,3,3-tetrabromoprop-1-en-1-yl)benzene (6):** Purification by flash chromatography (petroleum), colorless oil (5%, 8.6 mg); <sup>1</sup>H NMR (400 MHz, CDCl<sub>3</sub>): δ 7.51–7.49 (m, 2H), 7.36–7.35 (m, 3H), 7.06 (s, 1H), ppm; <sup>13</sup>C NMR (100 MHz, CDCl<sub>3</sub>): δ 138.5, 131.2, 129.4, 128.6, 127.7, 108.8; HRMS (ESI-TOF) *m/z* calcd for C<sub>9</sub>H<sub>6</sub>Br<sub>4</sub> [M + H]<sup>+</sup> 430.7276, found 430.7284.

## Reference

1. S. Guha; I. Kazi; D. Sathish; G. Sekar, *J. Org. Chem.* **2022**, *87*, 5424-5429.
2. S. Kumar; M. Patel; A. K. Verma, *Asian J. Org. Chem.* **2021**, *10*, 2365-2369.
3. X. Zeng; Y. Xu; J. Liu; Y. Deng, *Org. Lett.* **2021**, *23*, 9058-9062.
4. Z.-Y. Xu; Y.-P. Liu; X. Liu; R. Fu; W.-J. Hao; S.-J. Tu; B. Jiang, *Adv. Synth. Catal.* **2022**, *364*, 2666-2672.

## 12. The NMR and HRMS spectra for *gem*-dihaloenones

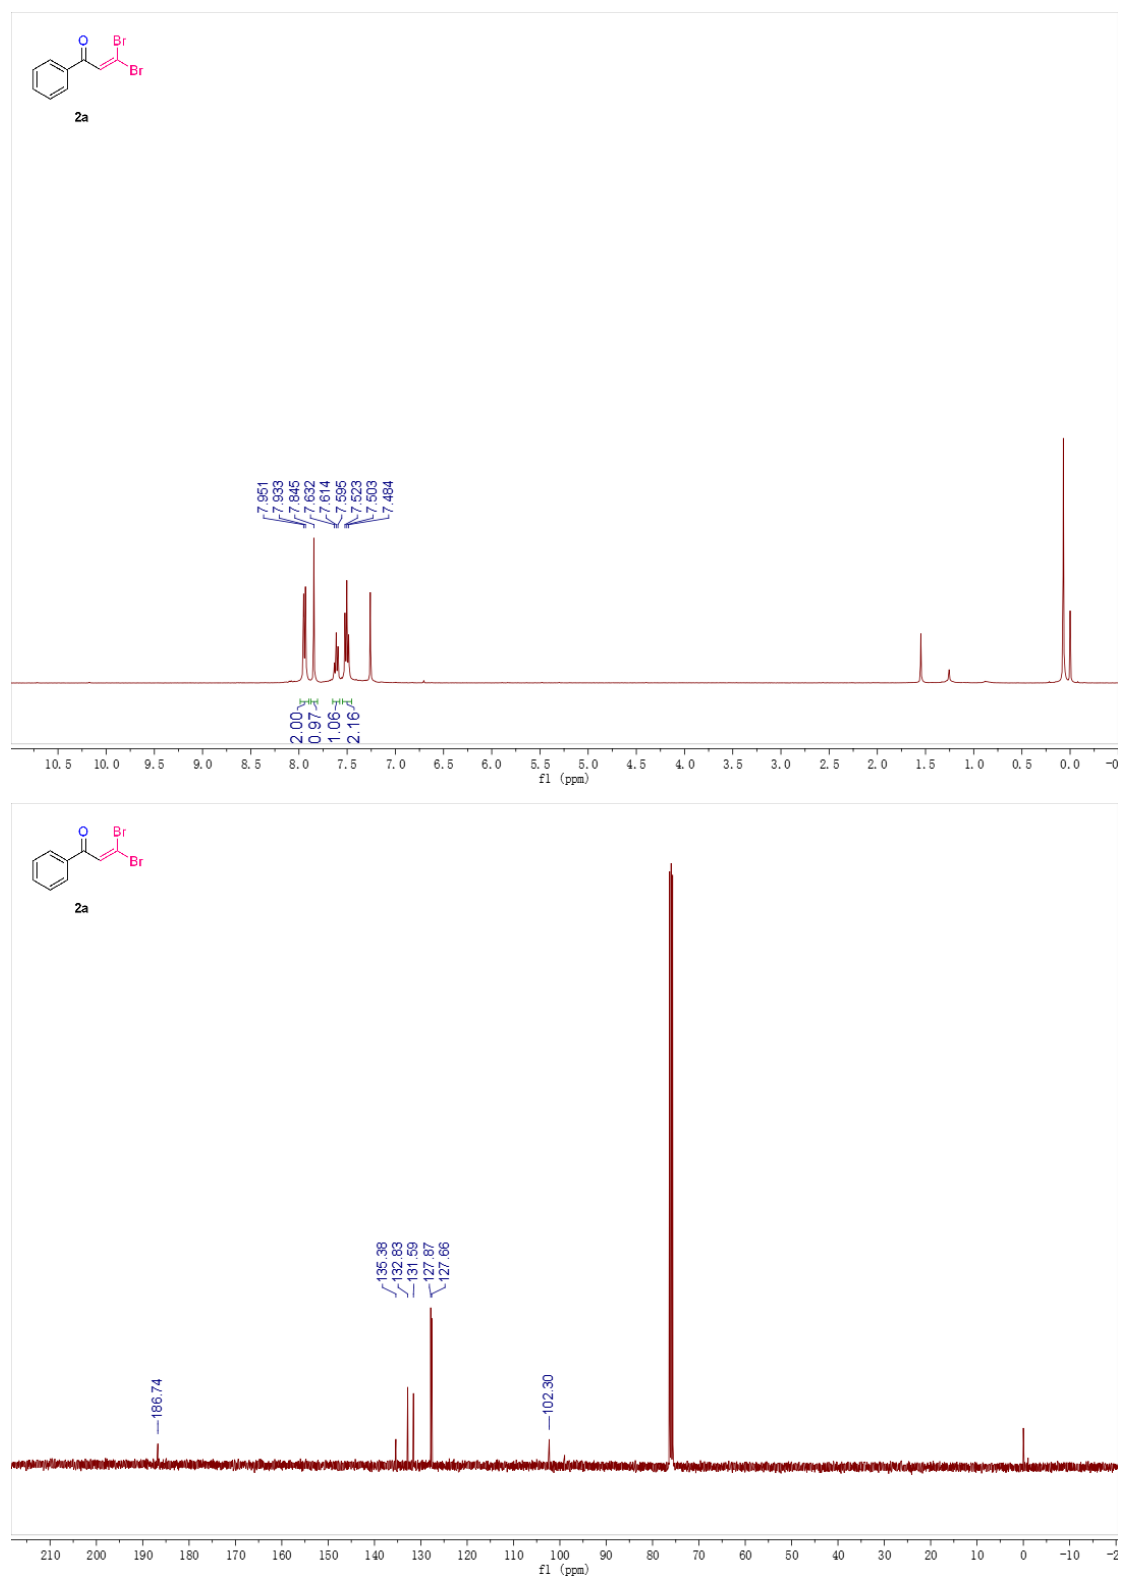

Figure S11.  $^1\text{H}$  NMR and  $^{13}\text{C}\{^1\text{H}\}$  NMR of 2a.



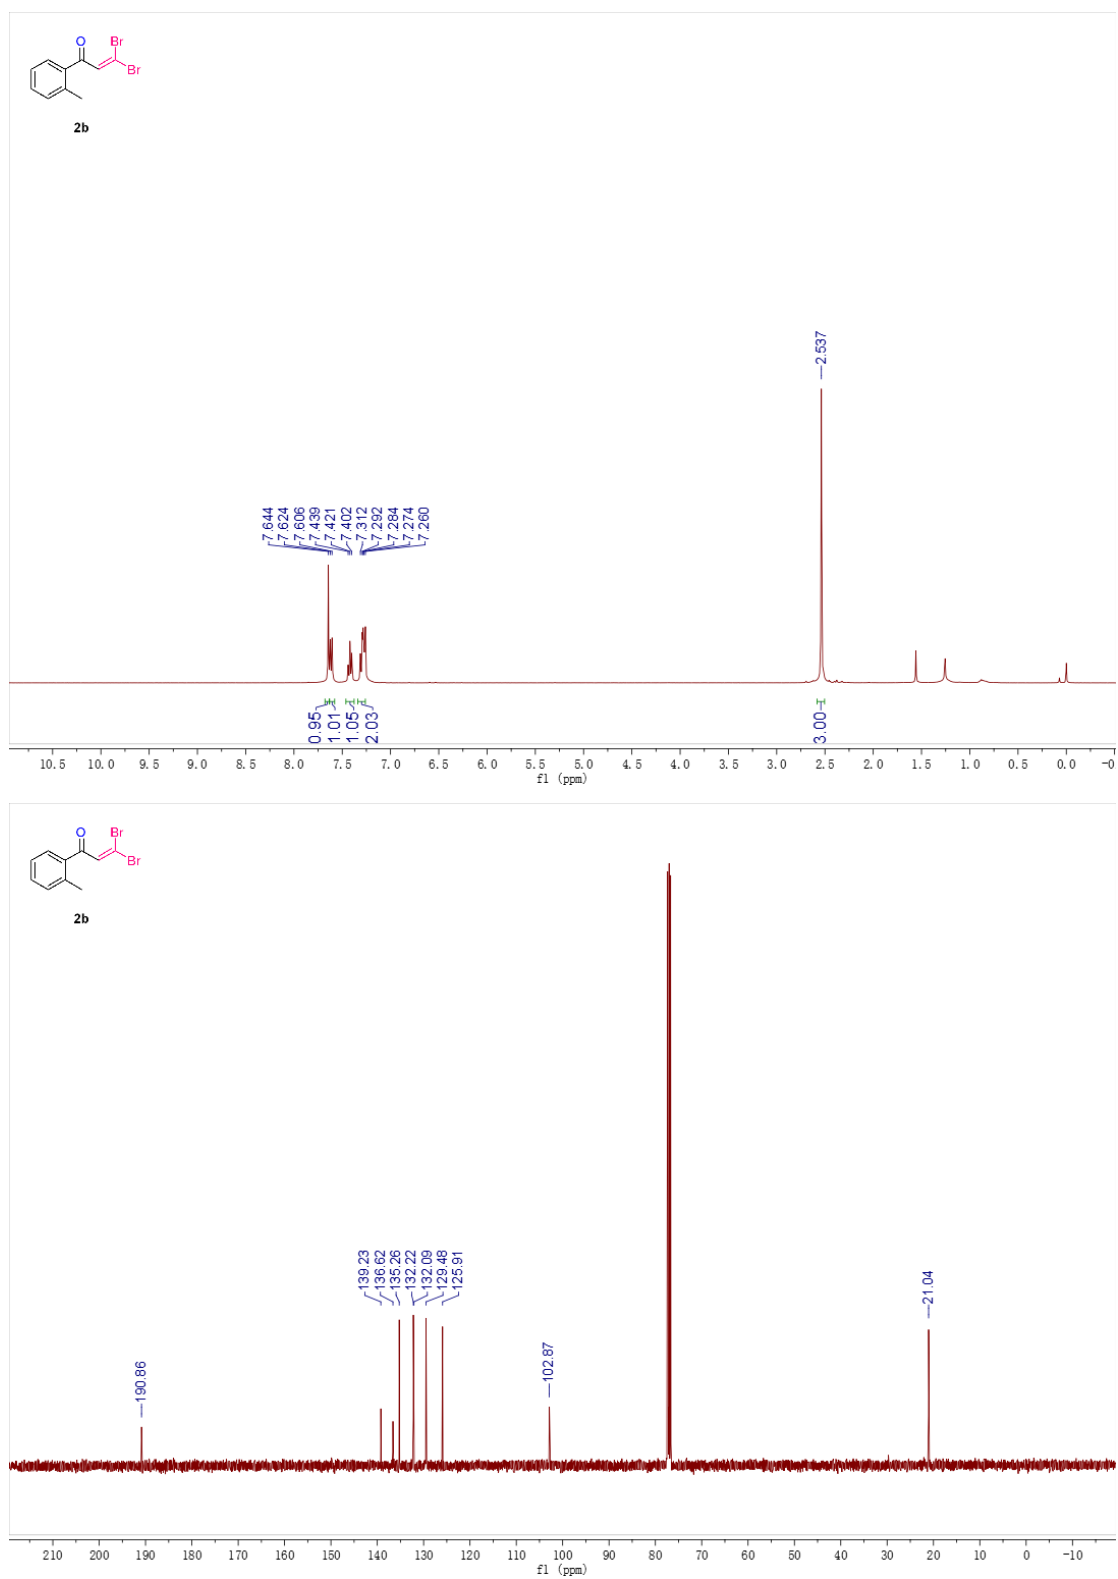

**Figure S12.**  $^1\text{H}$  NMR and  $^{13}\text{C}\{^1\text{H}\}$  NMR of **2b**.

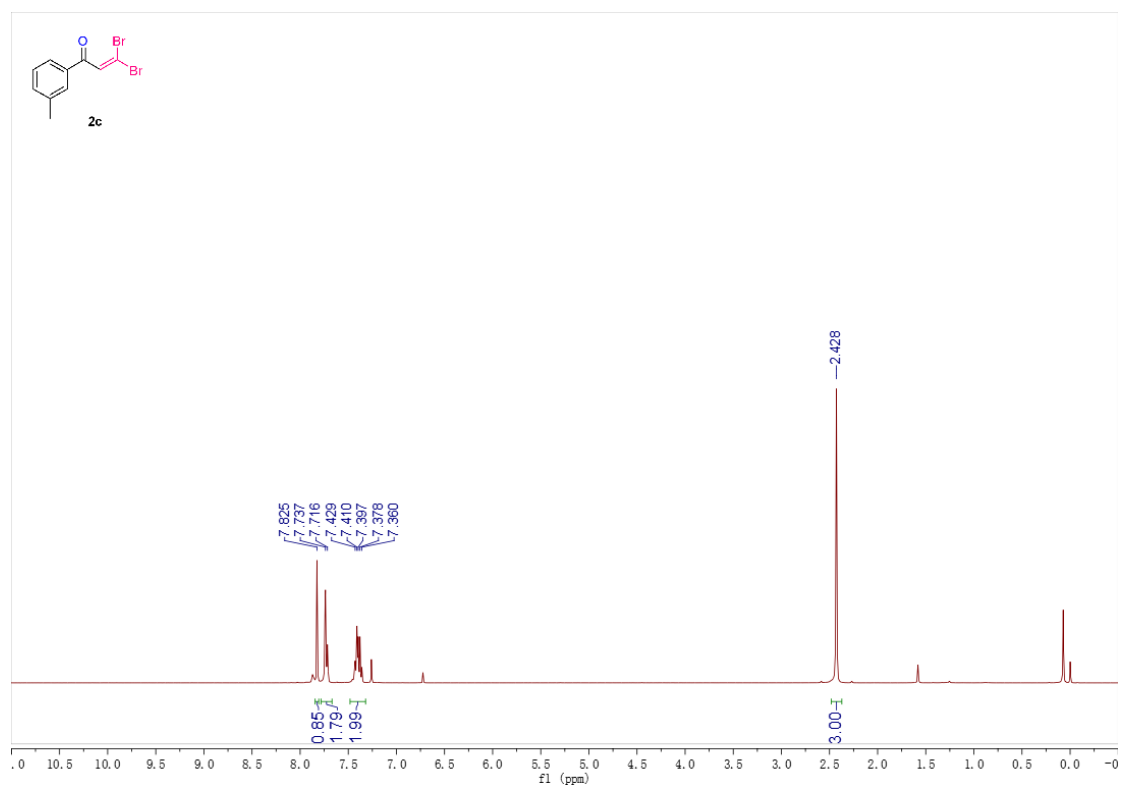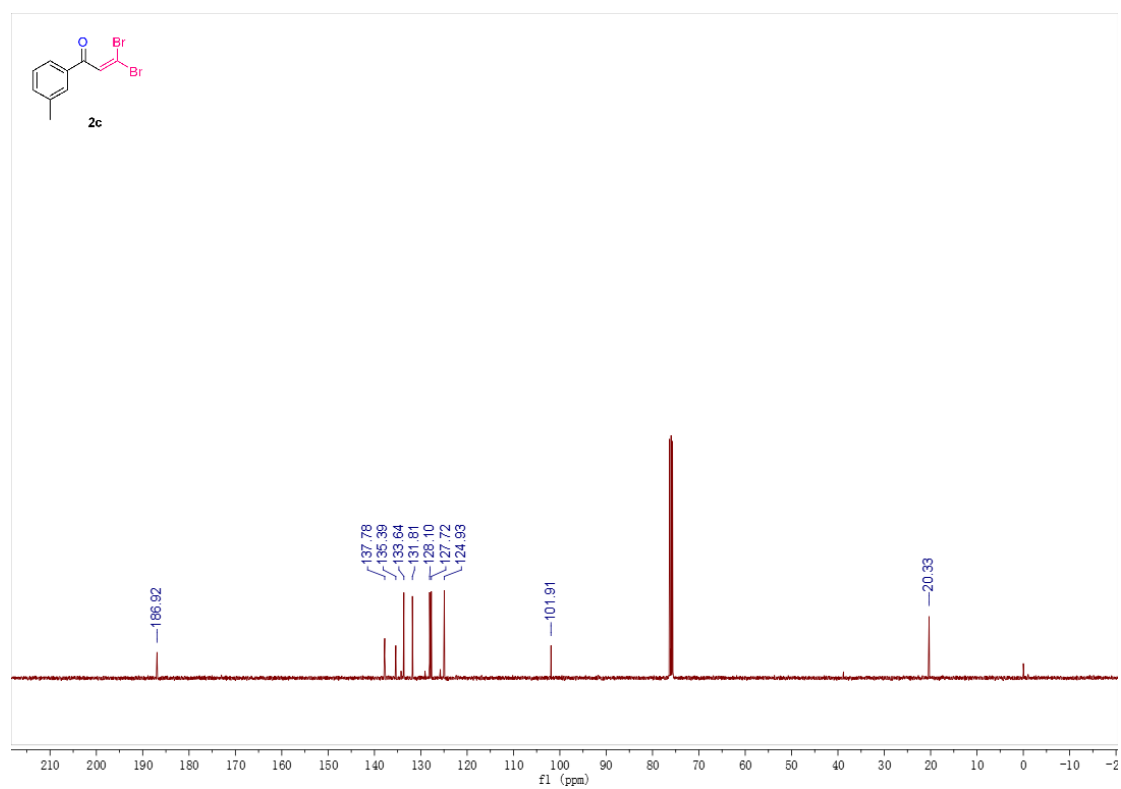

**Figure S13.**  $^1\text{H}$  NMR and  $^{13}\text{C}\{^1\text{H}\}$  NMR of **2c**.

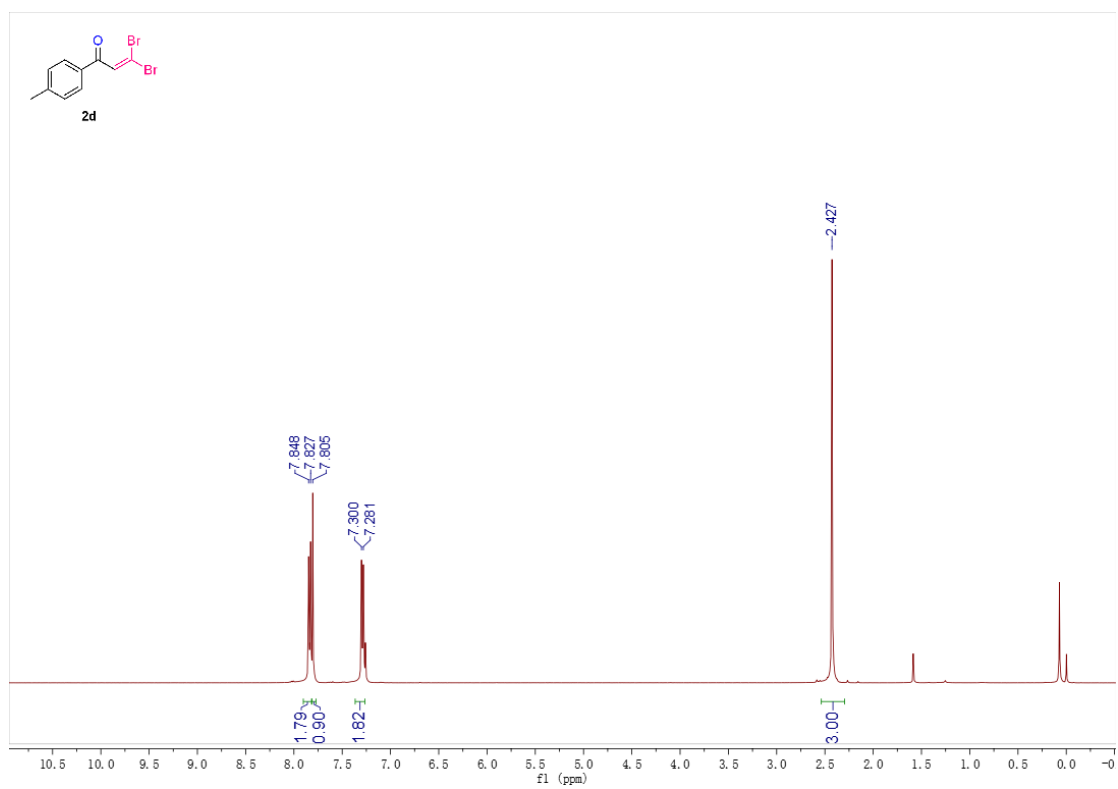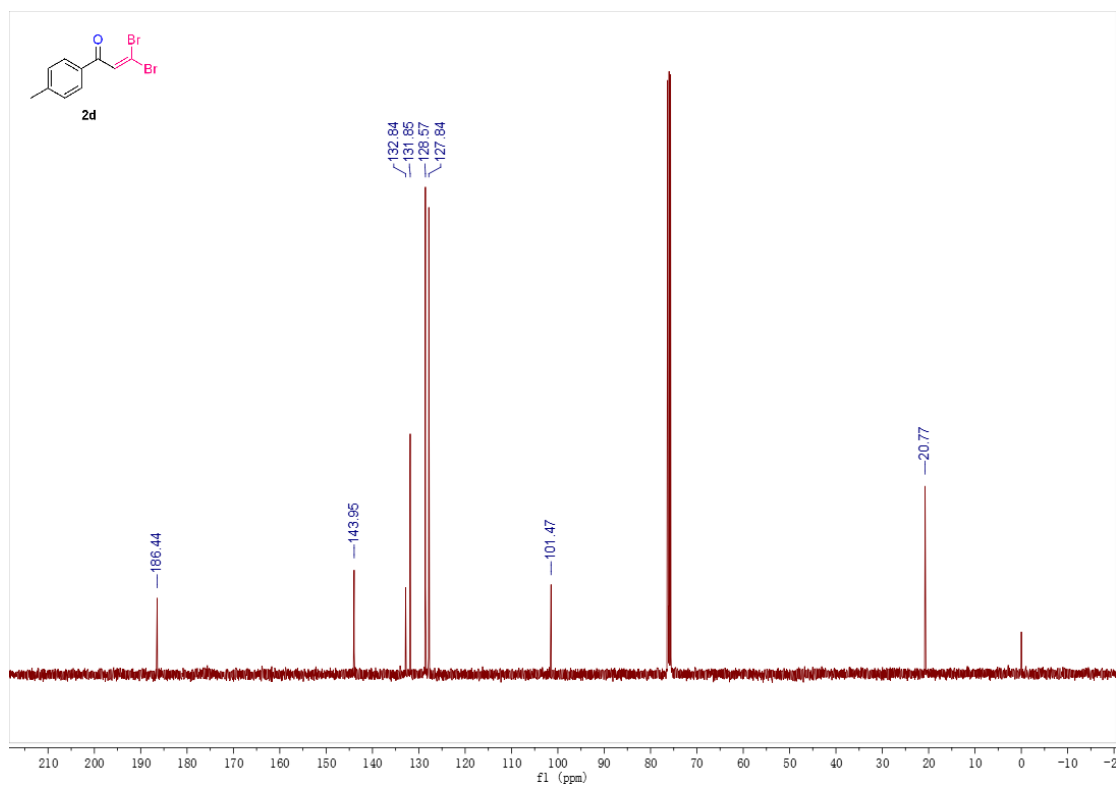

**Figure S14.**  $^1\text{H}$  NMR and  $^{13}\text{C}\{^1\text{H}\}$  NMR of **2d**.

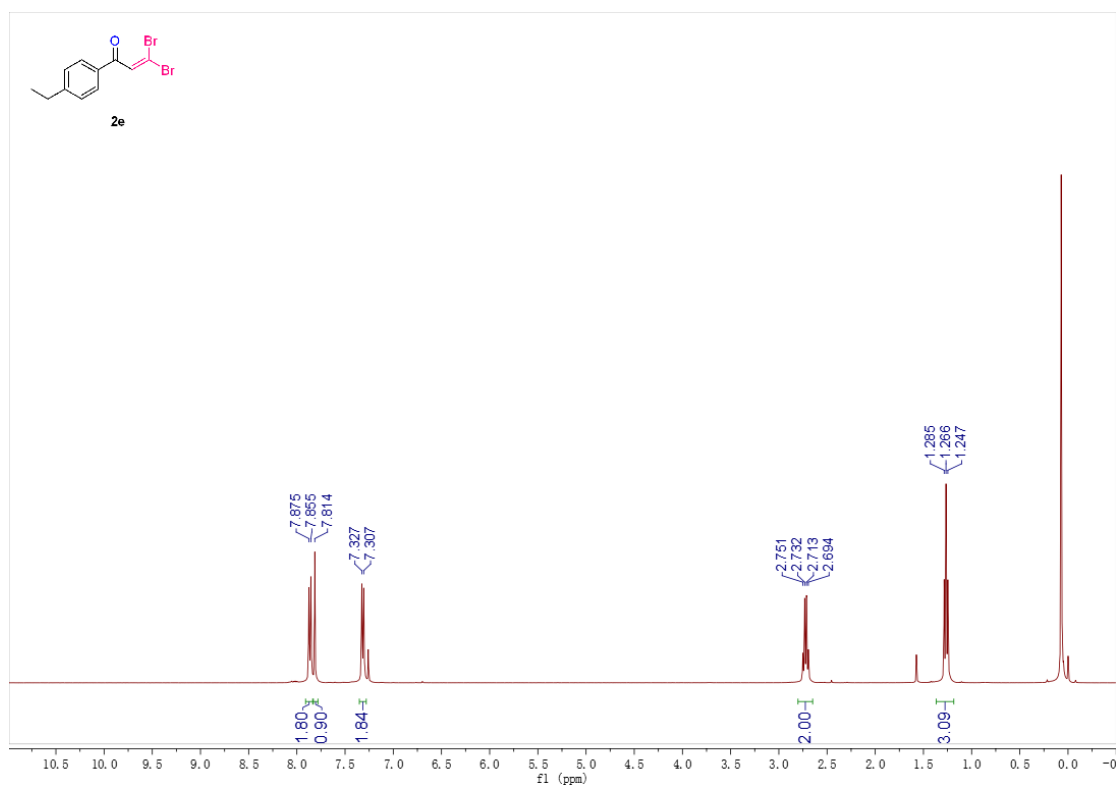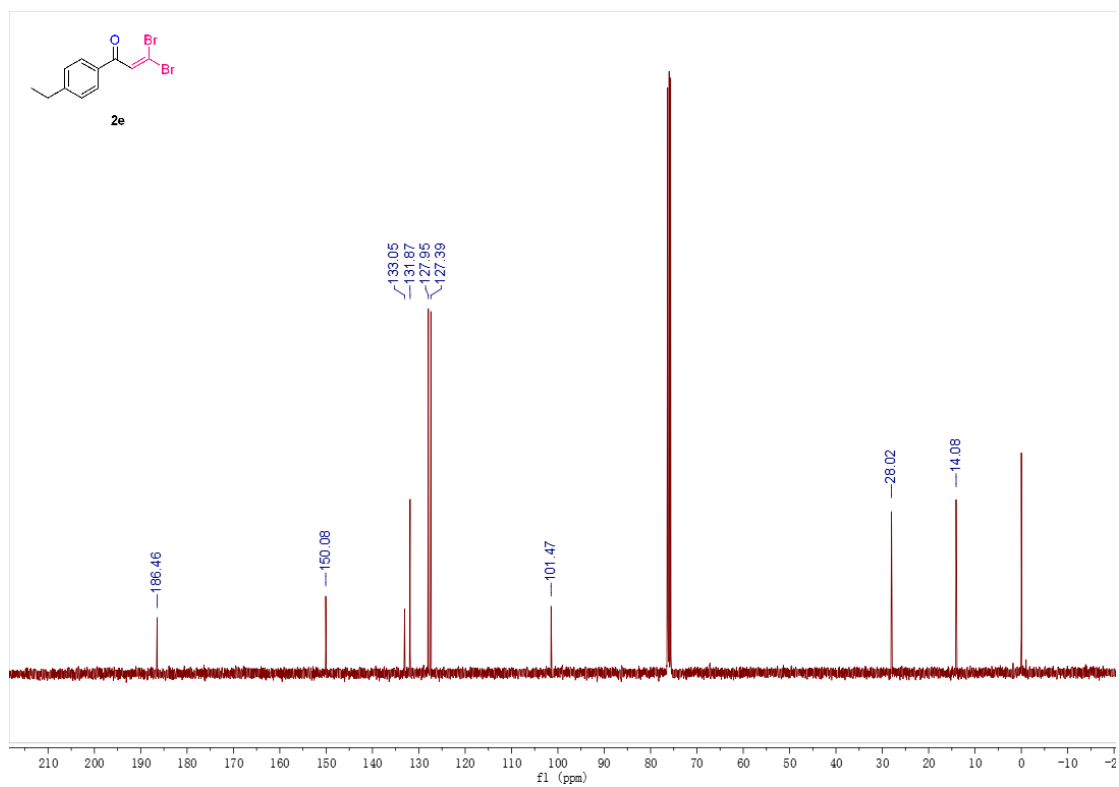

**Figure S15.**  $^1\text{H}$  NMR and  $^{13}\text{C}\{^1\text{H}\}$  NMR of **2e**.

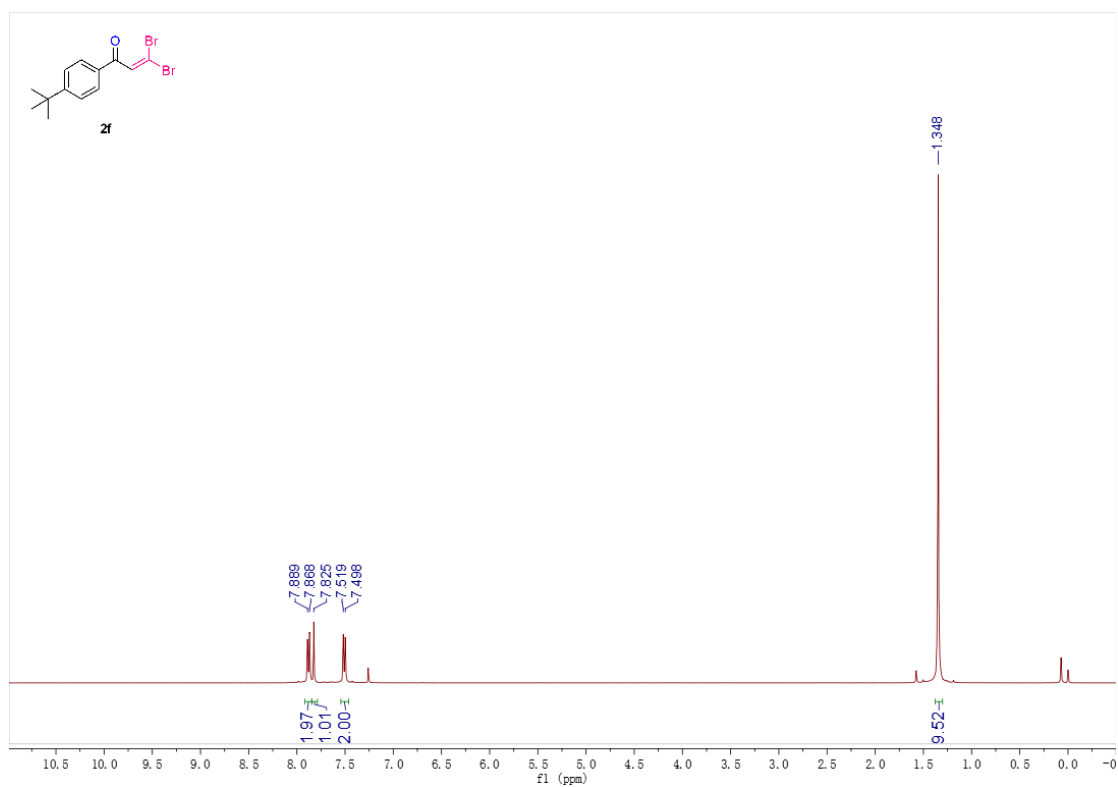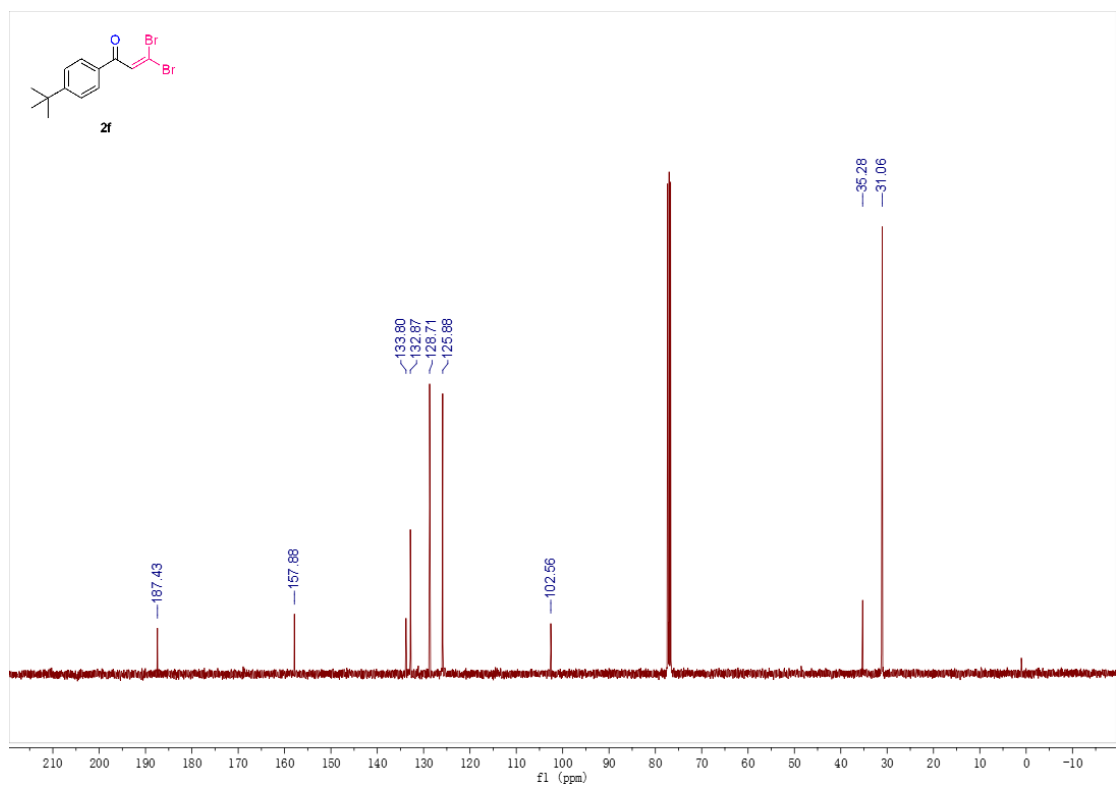

**Figure S16.**  $^1\text{H}$  NMR and  $^{13}\text{C}\{^1\text{H}\}$  NMR of **2f**.

## Single Mass Analysis

Tolerance = 10.0 PPM / DBE: min = -1.5, max = 50.0

Element prediction: Off

Number of isotope peaks used for i-FIT = 3

Monoisotopic Mass, Even Electron Ions

261 formula(e) evaluated with 1 results within limits (all results (up to 1000) for each mass)

Elements Used:

C: 13-13 H: 0-60 N: 0-6 O: 0-20 Si: 0-3 Br: 2-3

12

0521-1-3 111 (0.663)

1: TOF MS ES+  
5.36e+006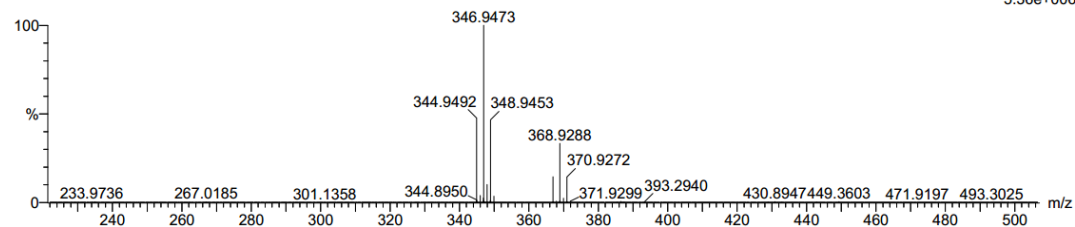

Minimum: -1.5  
Maximum: 5.0 10.0 50.0

| Mass     | Calc. Mass | mDa | PPM | DBE | i-FIT  | Norm | Conf (%) | Formula       |
|----------|------------|-----|-----|-----|--------|------|----------|---------------|
| 344.9492 | 344.9490   | 0.2 | 0.6 | 5.5 | 1378.5 | n/a  | n/a      | C13 H15 O Br2 |

Figure S17. HRMS Spectra of **2f**.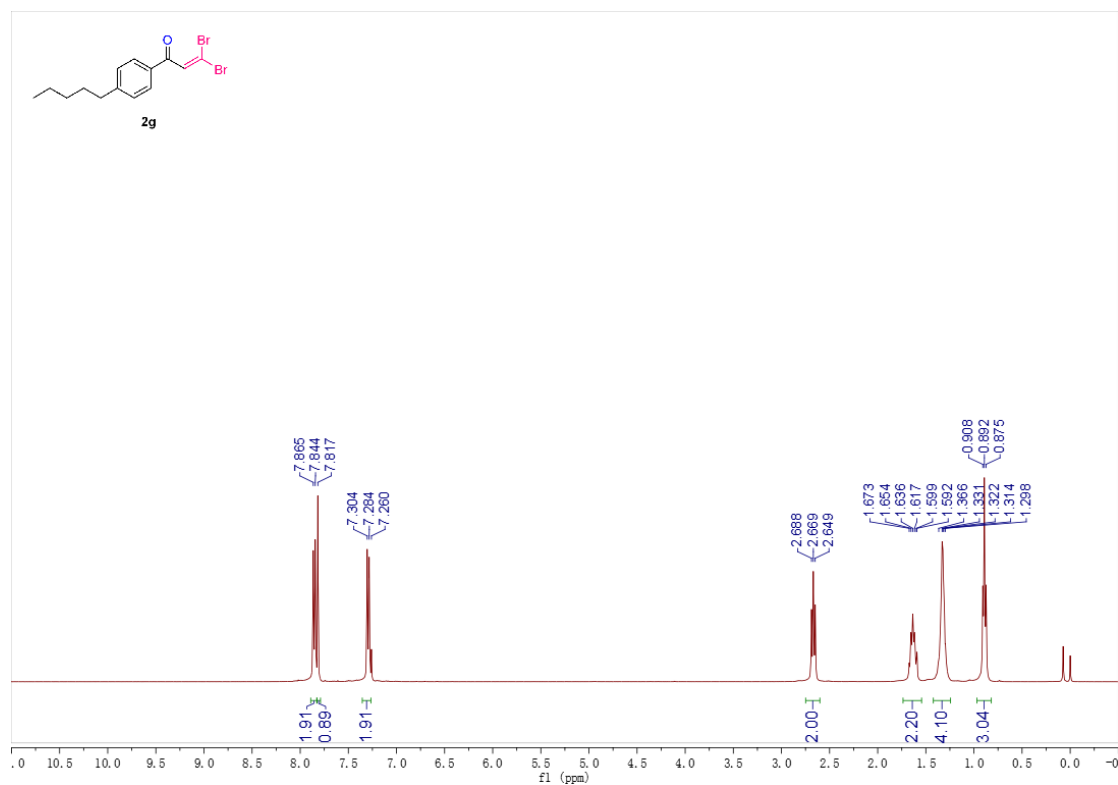

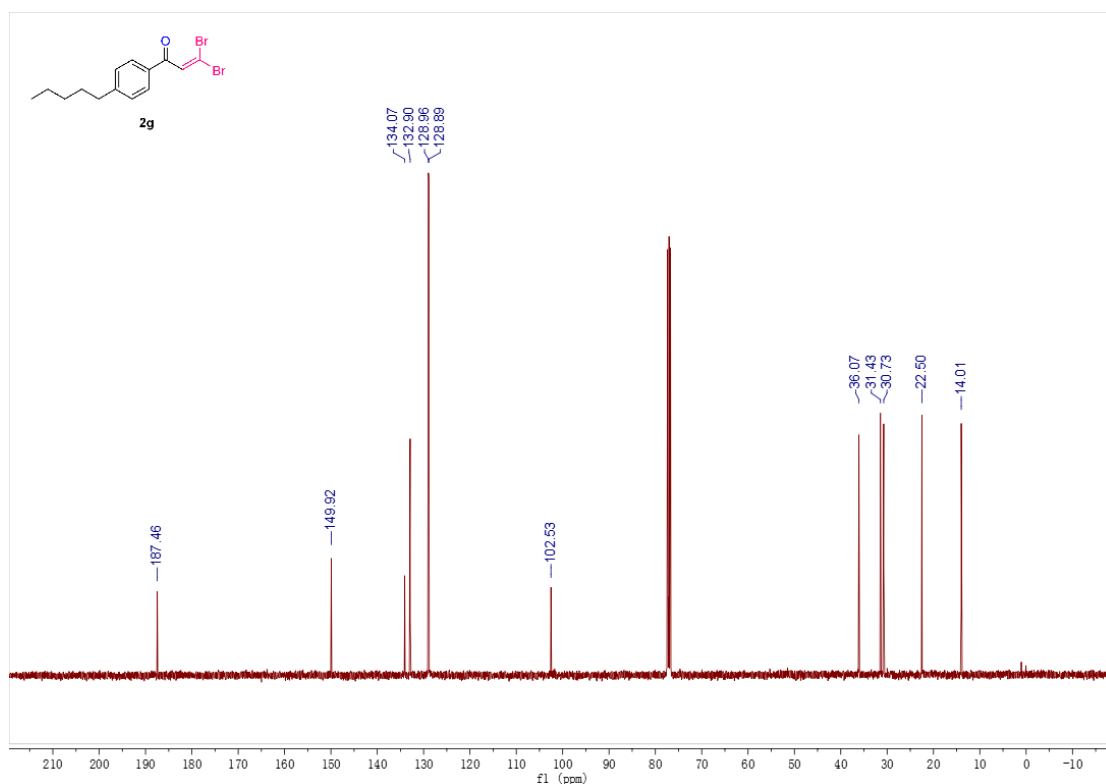

Figure S18.  $^1\text{H}$  NMR and  $^{13}\text{C}\{^1\text{H}\}$  NMR of **2g**.

#### Elemental Composition Report

Page 1

#### Single Mass Analysis

Tolerance = 10.0 PPM / DBE: min = -1.5, max = 50.0

Element prediction: Off

Number of isotope peaks used for i-FIT = 3

Monoisotopic Mass, Even Electron Ions

306 formula(e) evaluated with 1 results within limits (all results (up to 1000) for each mass)

Elements Used:

C: 14-14 H: 0-60 N: 0-6 O: 0-20 Si: 0-3 Br: 2-3

12

0521-1-4 163 (0.968)

1: TOF MS ES+  
7.00e+005

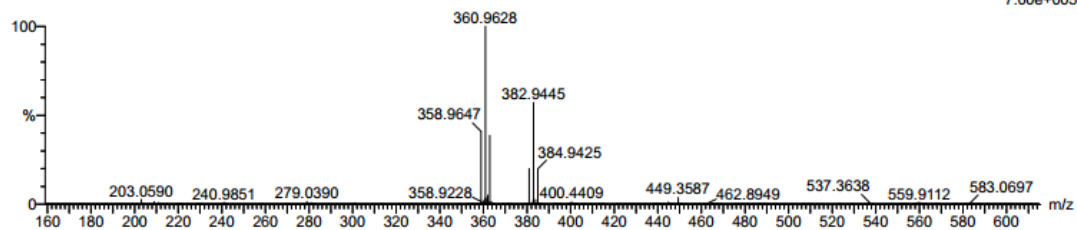

Minimum: -1.5  
Maximum: 5.0 10.0 50.0

| Mass     | Calc. Mass | mDa | PPM | DBE | i-FIT  | Norm | Conf (%) | Formula       |
|----------|------------|-----|-----|-----|--------|------|----------|---------------|
| 358.9647 | 358.9646   | 0.1 | 0.3 | 5.5 | 1118.0 | n/a  | n/a      | C14 H17 O Br2 |

Figure S19. HRMS Spectra of **2g**.

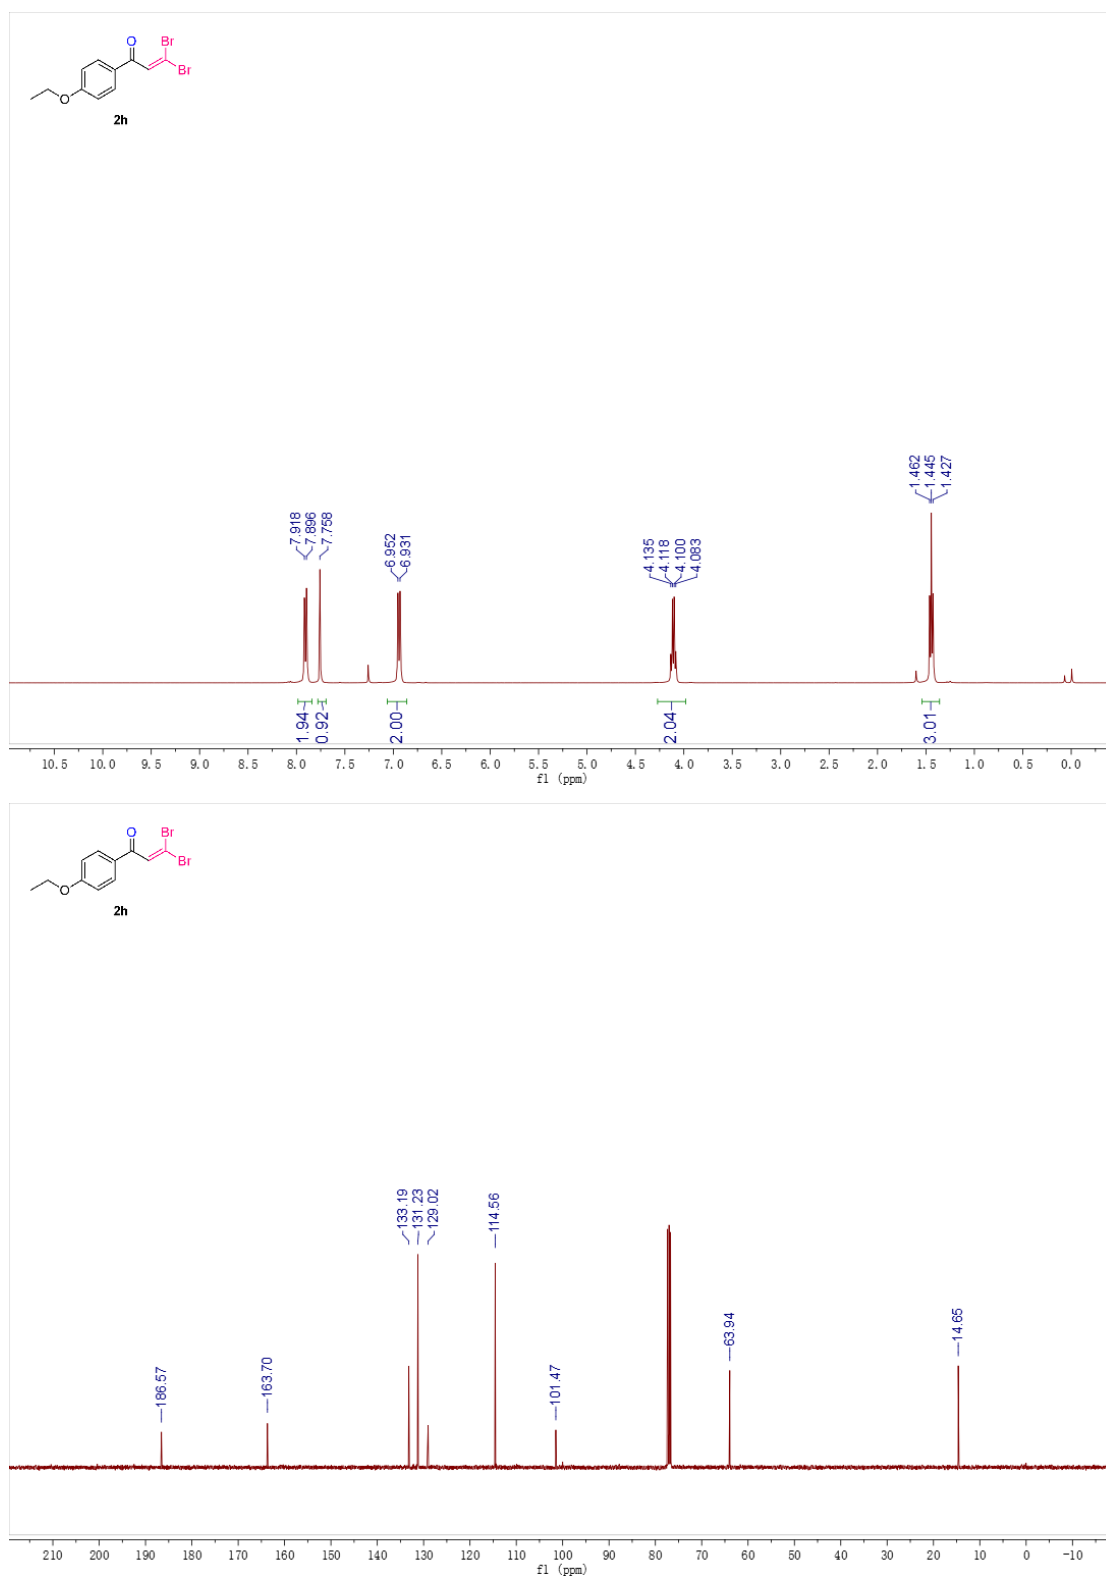

**Figure S20.**  $^1\text{H}$  NMR and  $^{13}\text{C}\{^1\text{H}\}$  NMR of **2h**.



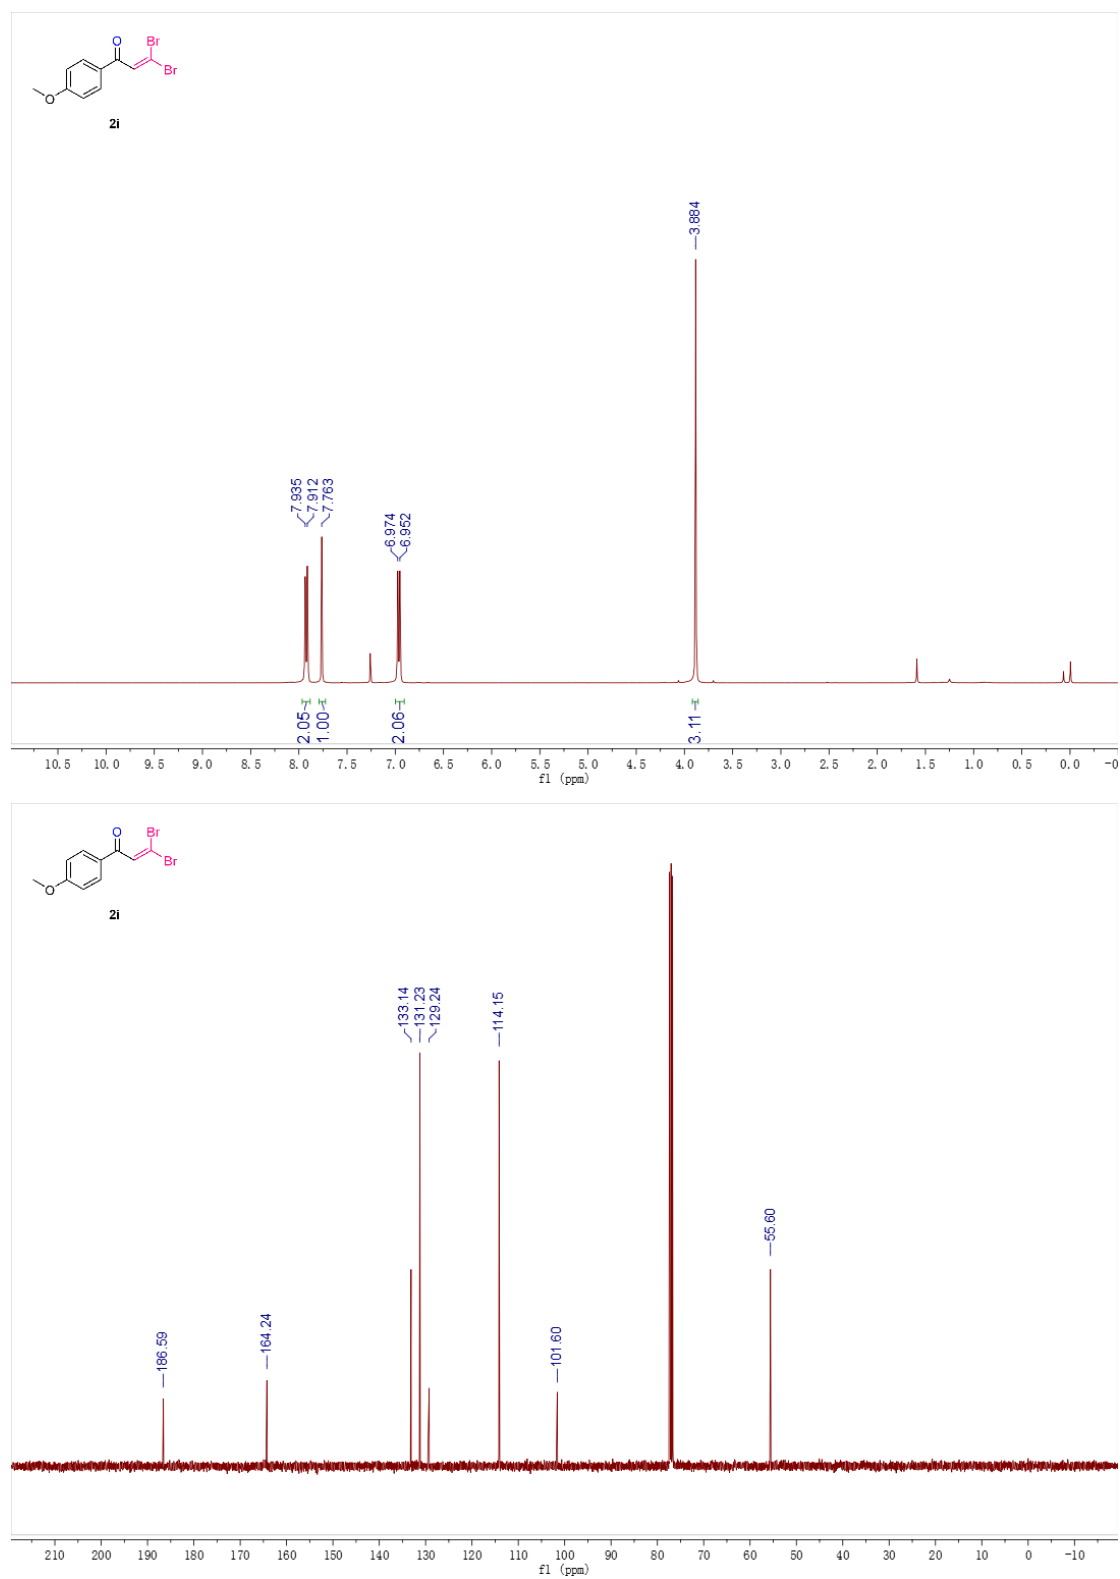

**Figure S21.**  $^1\text{H}$  NMR and  $^{13}\text{C}\{^1\text{H}\}$  NMR of **2i**.

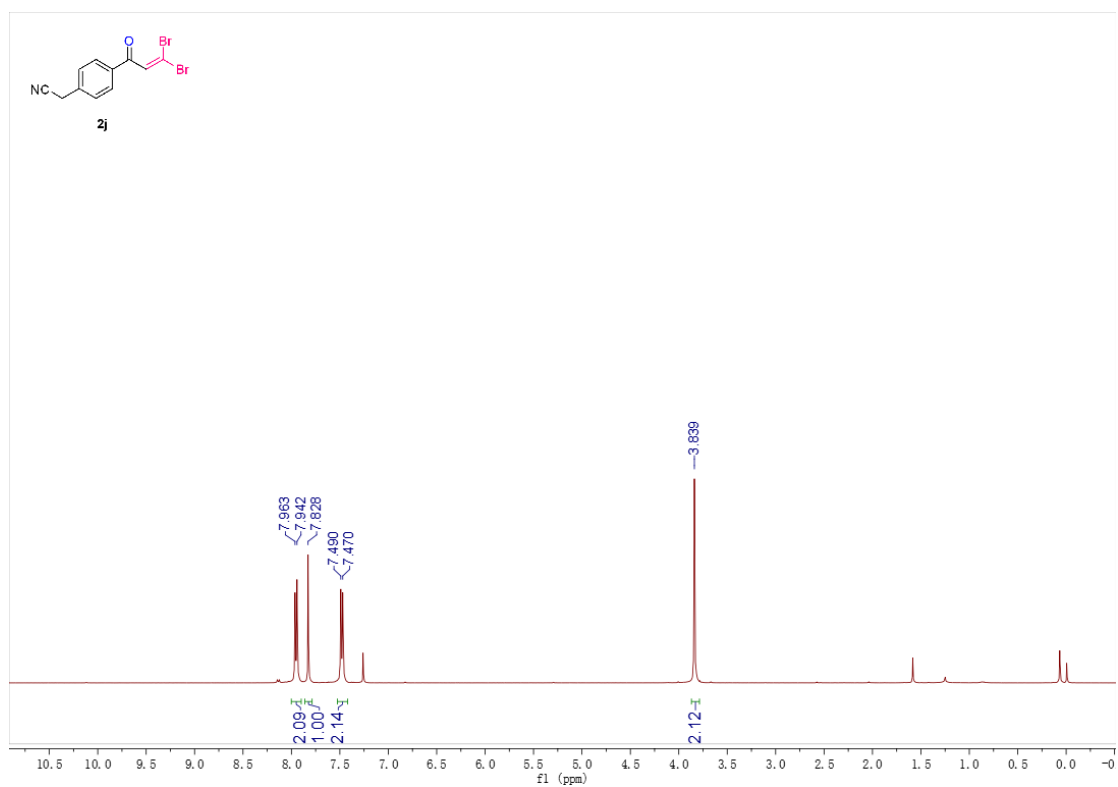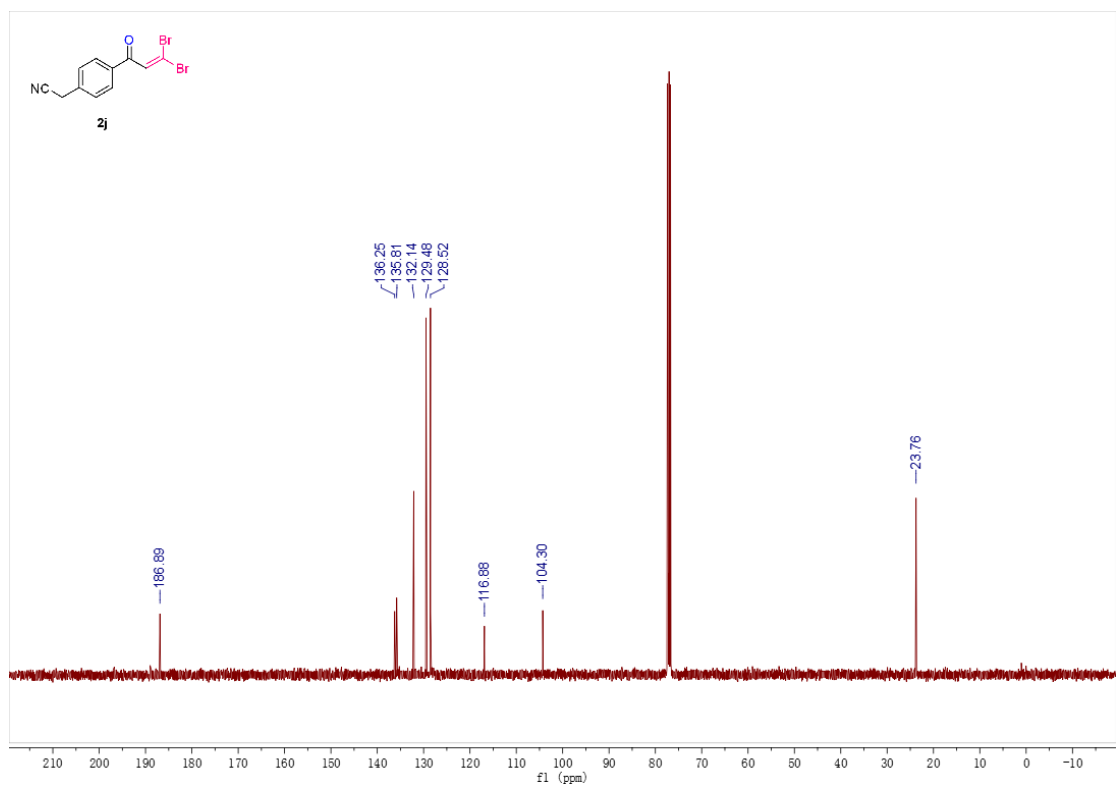

**Figure S22.**  $^1\text{H}$  NMR and  $^{13}\text{C}\{^1\text{H}\}$  NMR of **2j**.

## Single Mass Analysis

Tolerance = 10.0 PPM / DBE: min = -1.5, max = 50.0

Element prediction: Off

Number of isotope peaks used for i-FIT = 3

Monoisotopic Mass, Even Electron Ions

83 formula(e) evaluated with 1 results within limits (all results (up to 1000) for each mass)

Elements Used:

C: 11-11 H: 0-60 N: 0-6 O: 0-20 Br: 2-3

12

0521-1-8 56 (0.343)

1: TOF MS ES+  
1.27e+003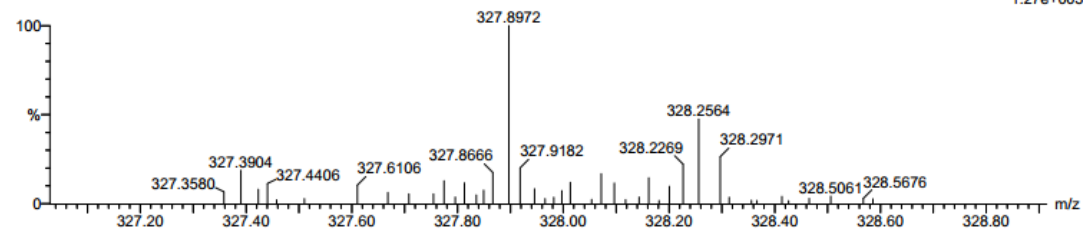Minimum: -1.5  
Maximum: 5.0 10.0 50.0

| Mass     | Calc. Mass | mDa  | PPM  | DBE | i-FIT | Norm | Conf (%) | Formula    |
|----------|------------|------|------|-----|-------|------|----------|------------|
| 327.8972 | 327.8973   | -0.1 | -0.3 | 7.5 | 247.0 | n/a  | n/a      | C11H8NOBr2 |

Figure S23. HRMS Spectra of 2j.

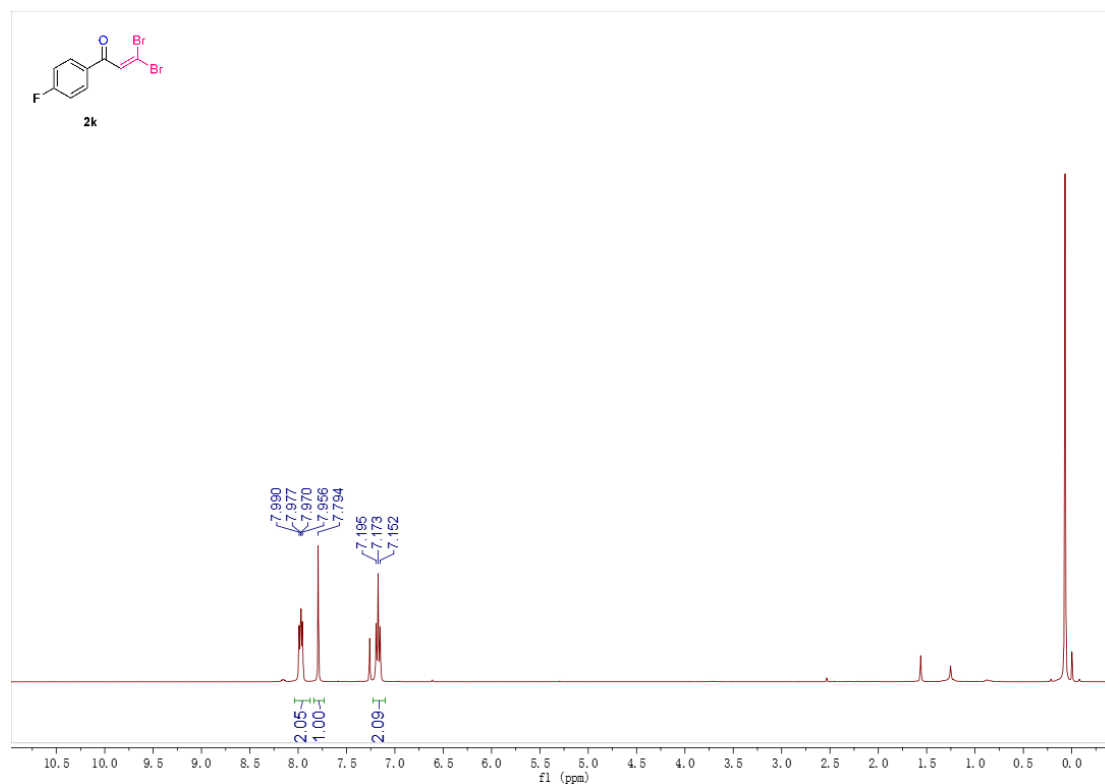

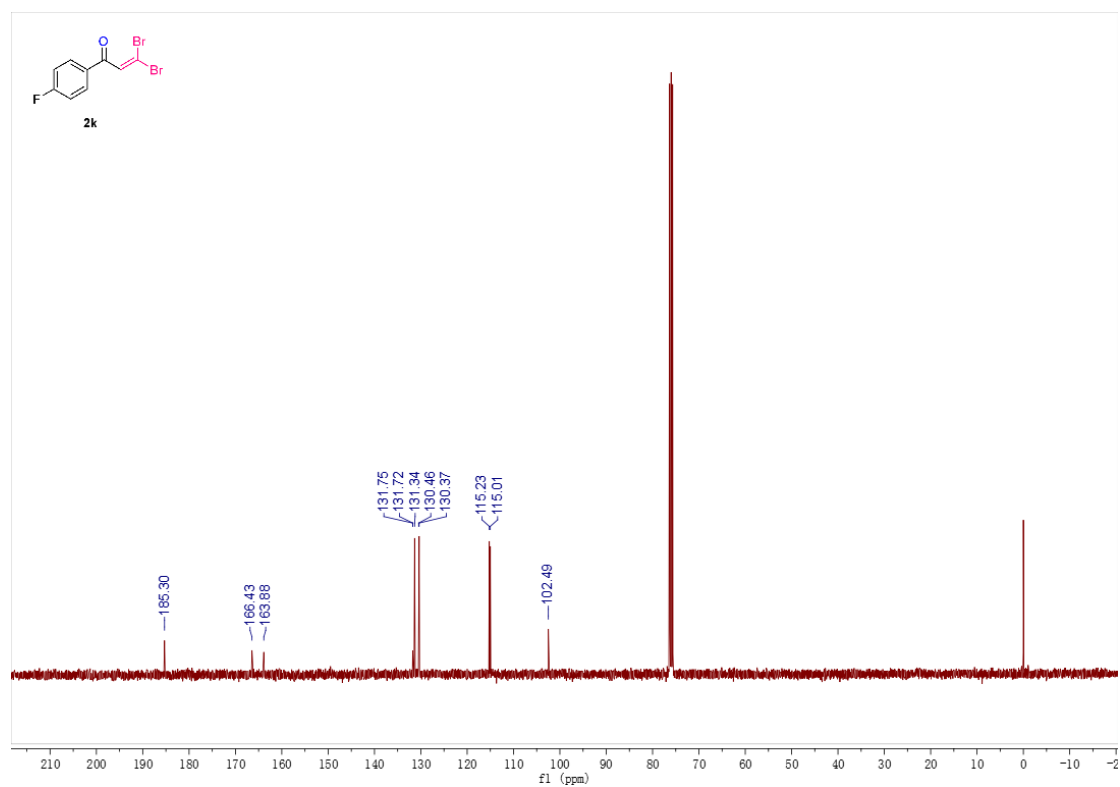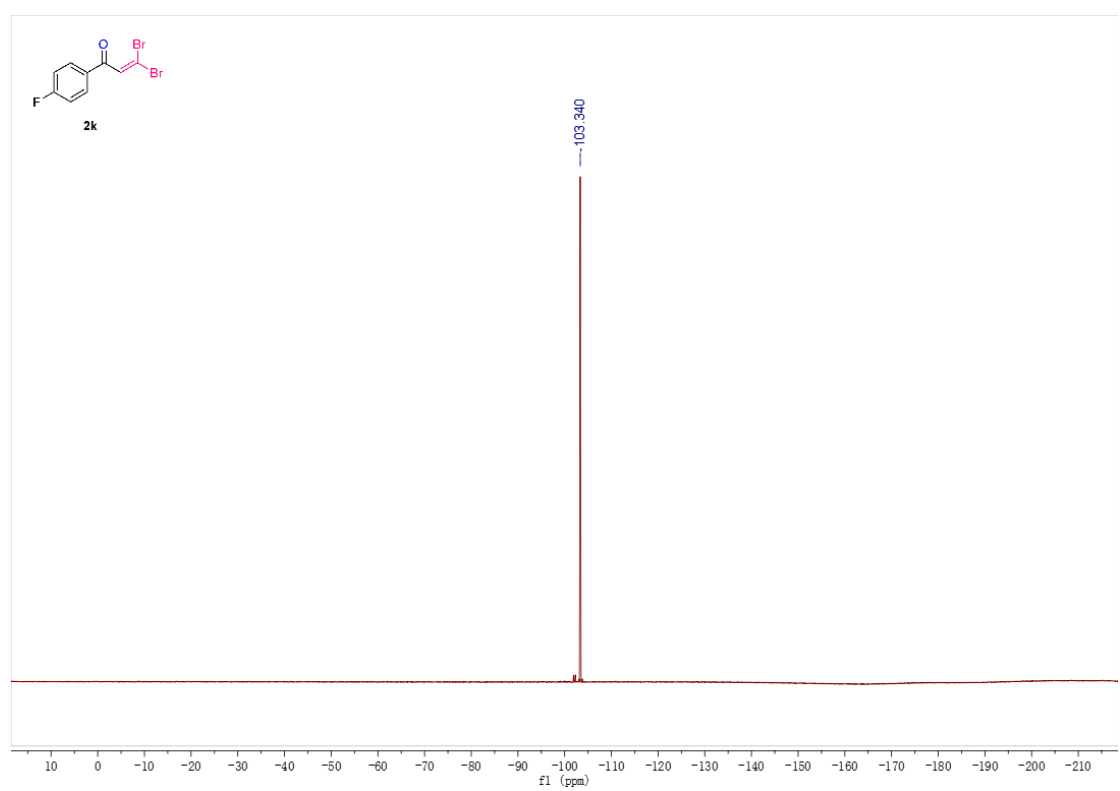

**Figure S24.**  $^1\text{H}$  NMR and  $^{13}\text{C}\{^1\text{H}\}$  NMR and  $^{19}\text{F}$  NMR of **2k**.

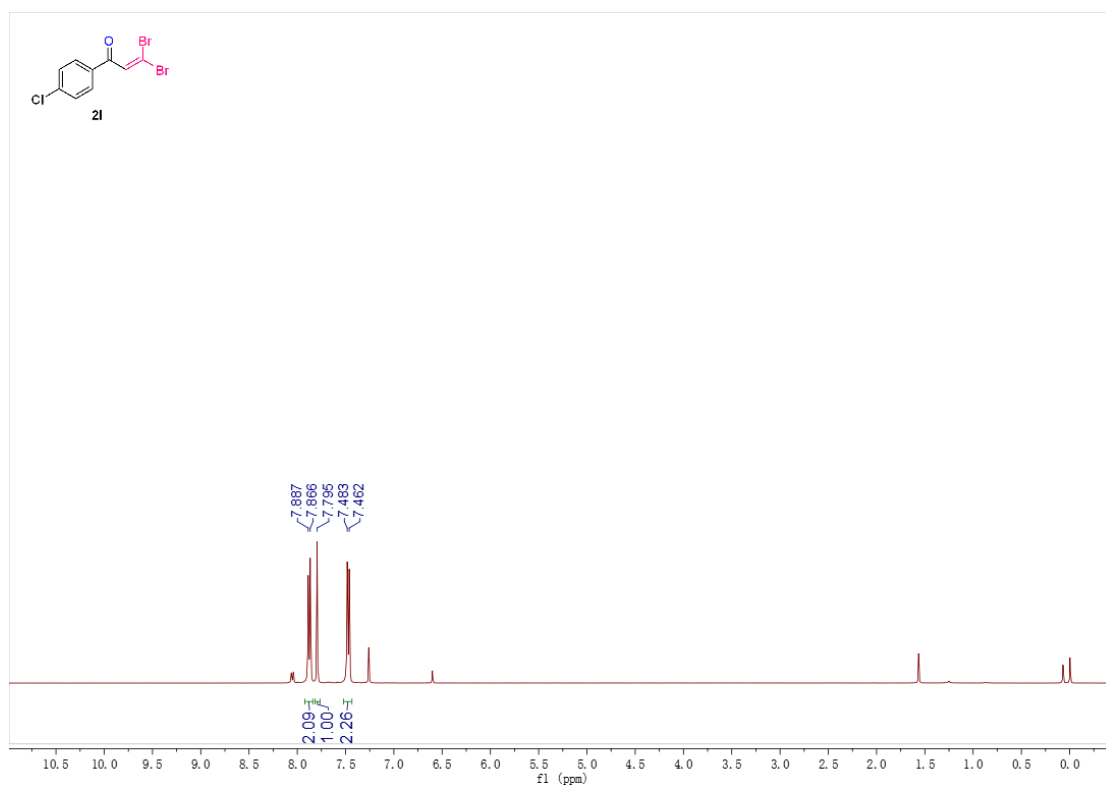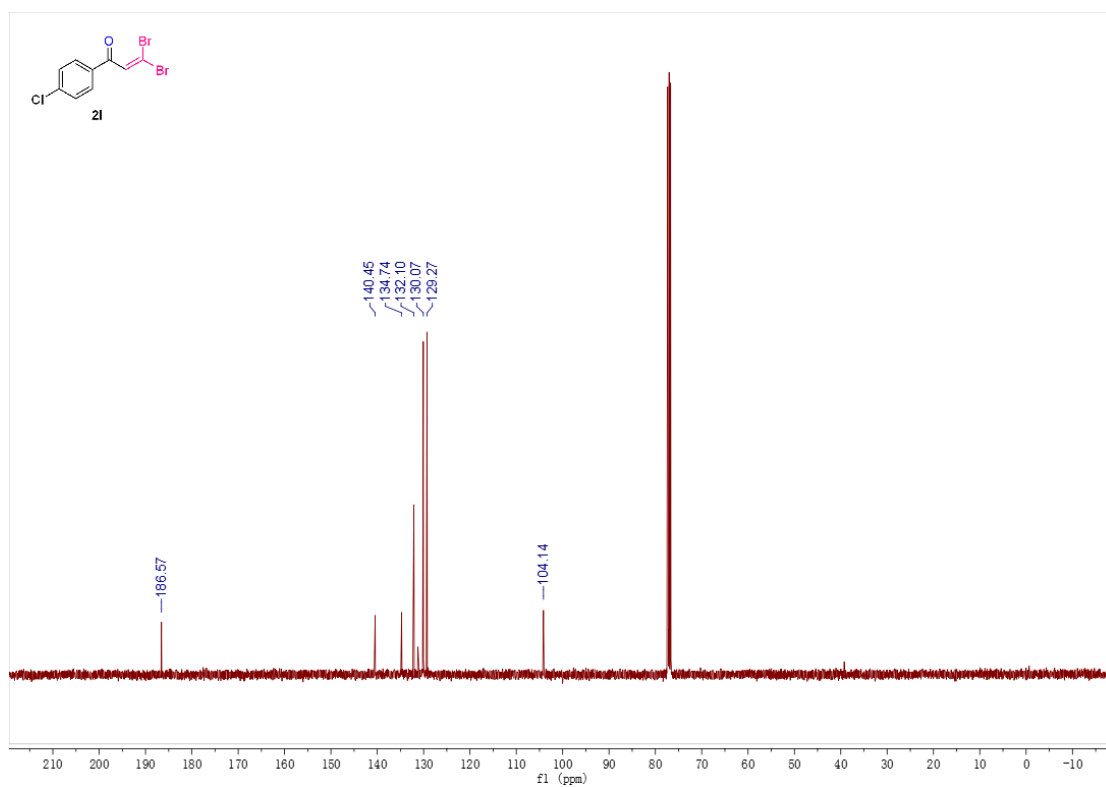

**Figure S25.**  $^1\text{H}$  NMR and  $^{13}\text{C}\{^1\text{H}\}$  NMR of **2l**.

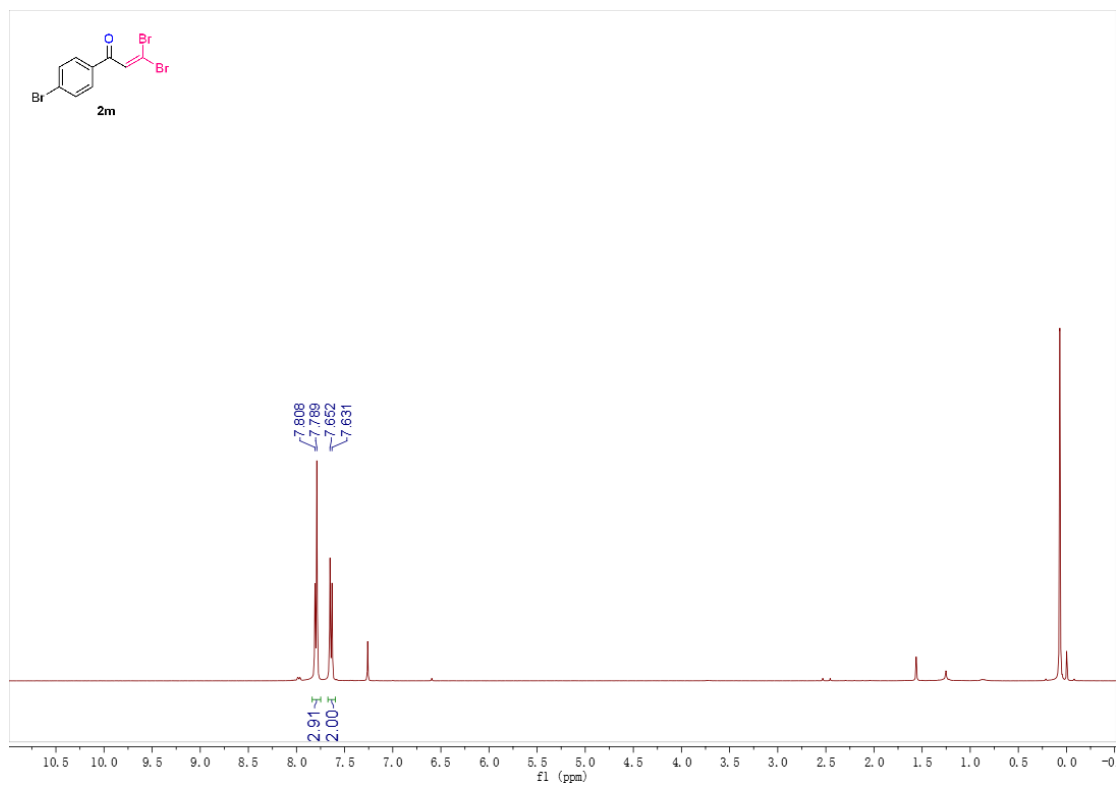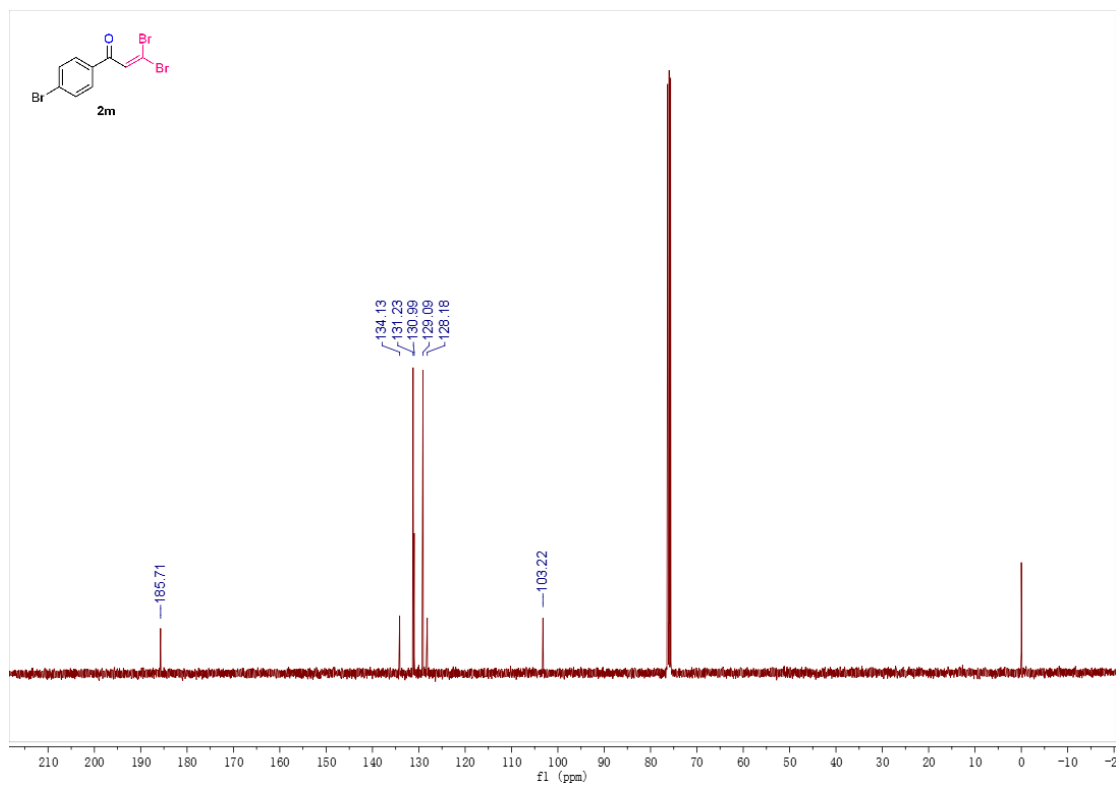

Figure S26.  $^1\text{H NMR}$  and  $^{13}\text{C}\{^1\text{H}\}$  NMR of **2m**.

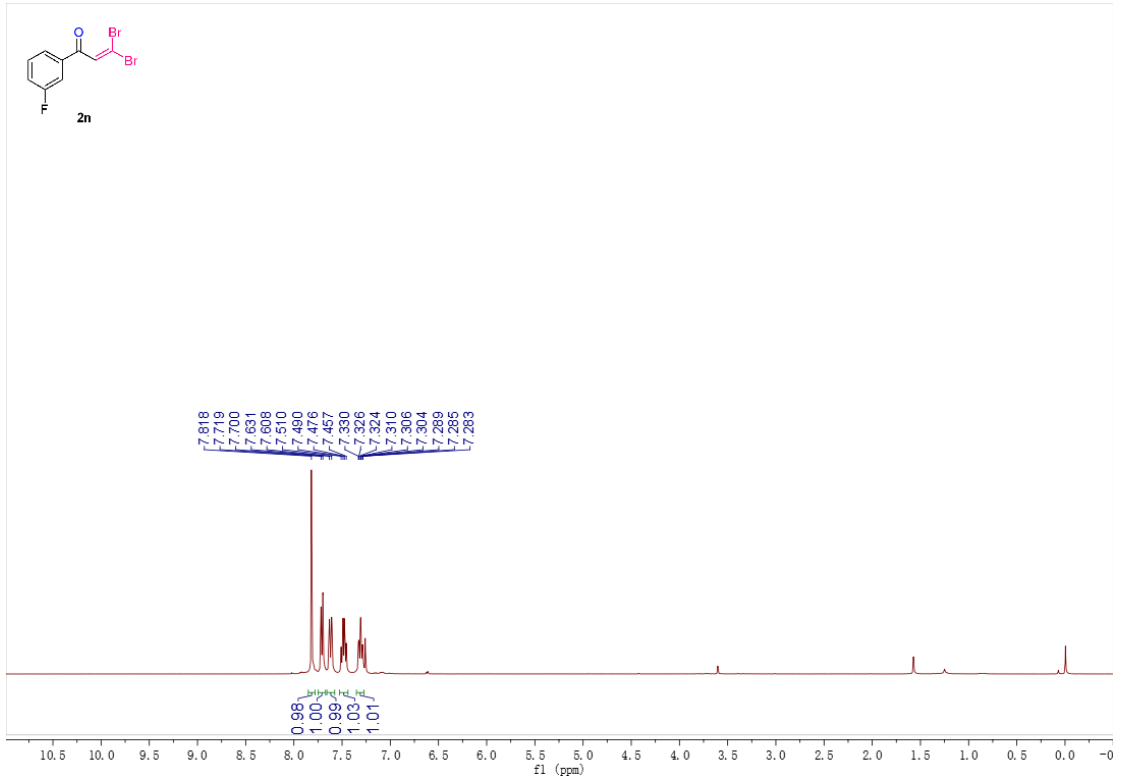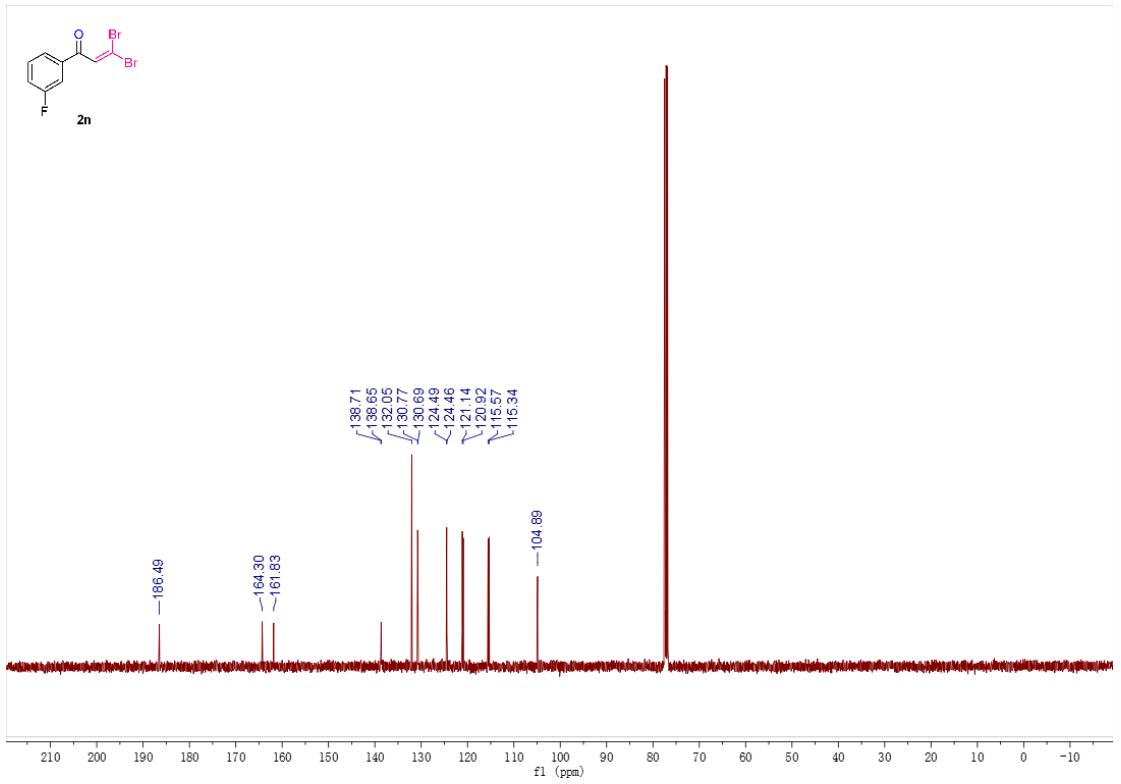

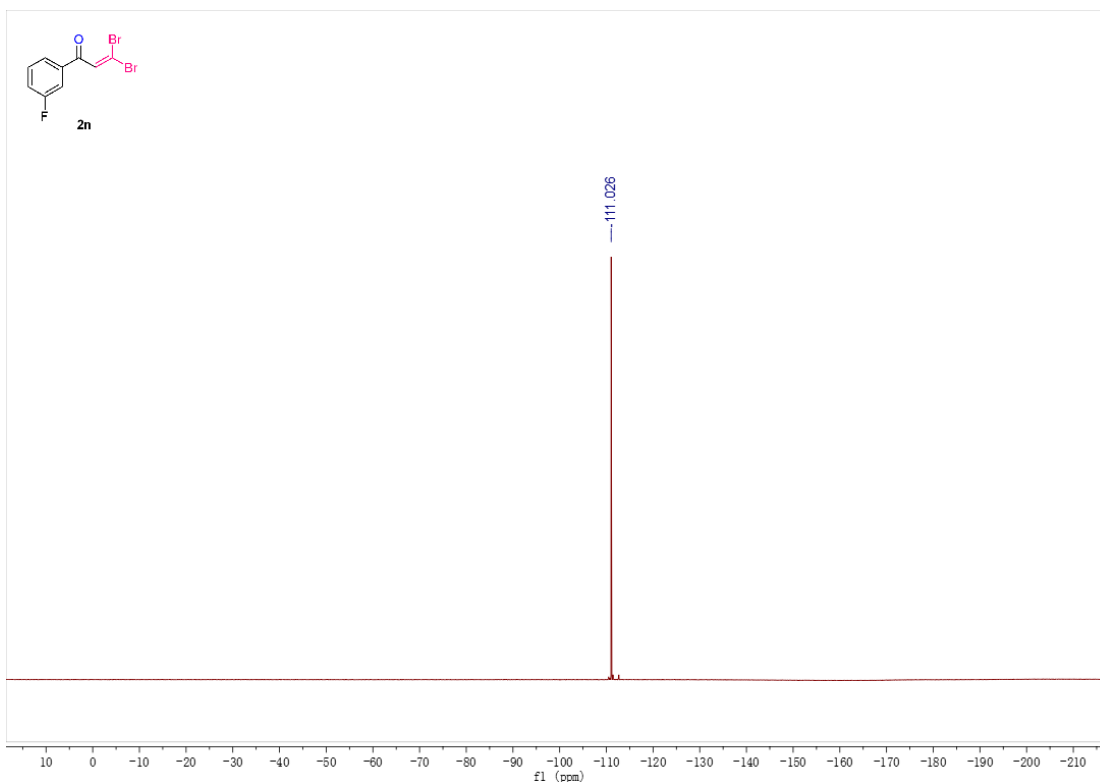

**Figure S27.** <sup>1</sup>H NMR and <sup>13</sup>C{<sup>1</sup>H} NMR and <sup>19</sup>F NMR of **2n**.

**Elemental Composition Report**

Page 1

**Single Mass Analysis**

Tolerance = 10.0 PPM / DBE: min = -1.5, max = 50.0

Element prediction: Off

Number of isotope peaks used for i-FIT = 3

Monoisotopic Mass, Even Electron Ions

118 formula(e) evaluated with 1 results within limits (all results (up to 1000) for each mass)

Elements Used:

C: 9-9 H: 0-60 N: 0-6 O: 0-20 Br: 2-3 F: 1-3

12

0521-1-1 69 (0.419)

1: TOF MS ES+  
2.97e+005

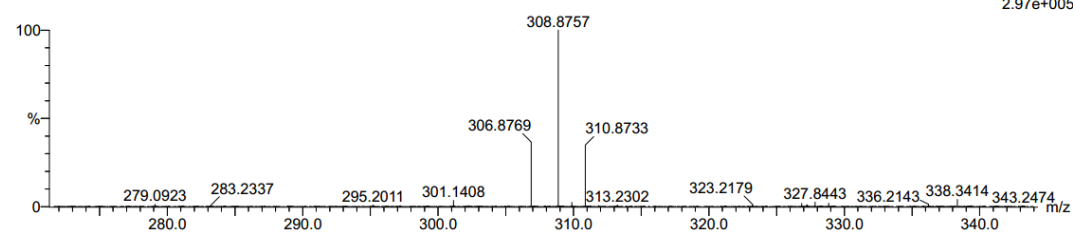

Minimum: -1.5  
Maximum: 50.0

| Mass     | Calc. Mass | mDa | PPM | DBE | i-FIT | Norm | Conf (%) | Formula       |
|----------|------------|-----|-----|-----|-------|------|----------|---------------|
| 306.8769 | 306.8769   | 0.0 | 0.0 | 5.5 | 970.6 | n/a  | n/a      | C9 H6 O Br2 F |

**Figure S28.** HRMS Spectra of **2n**.



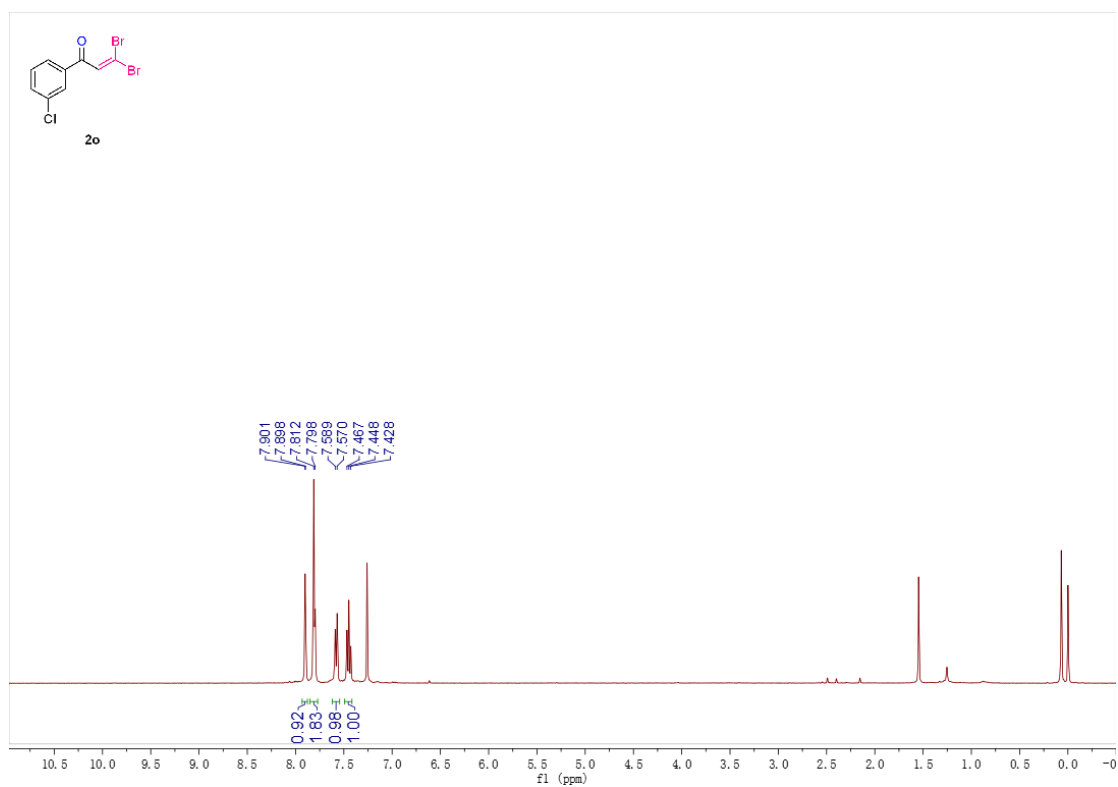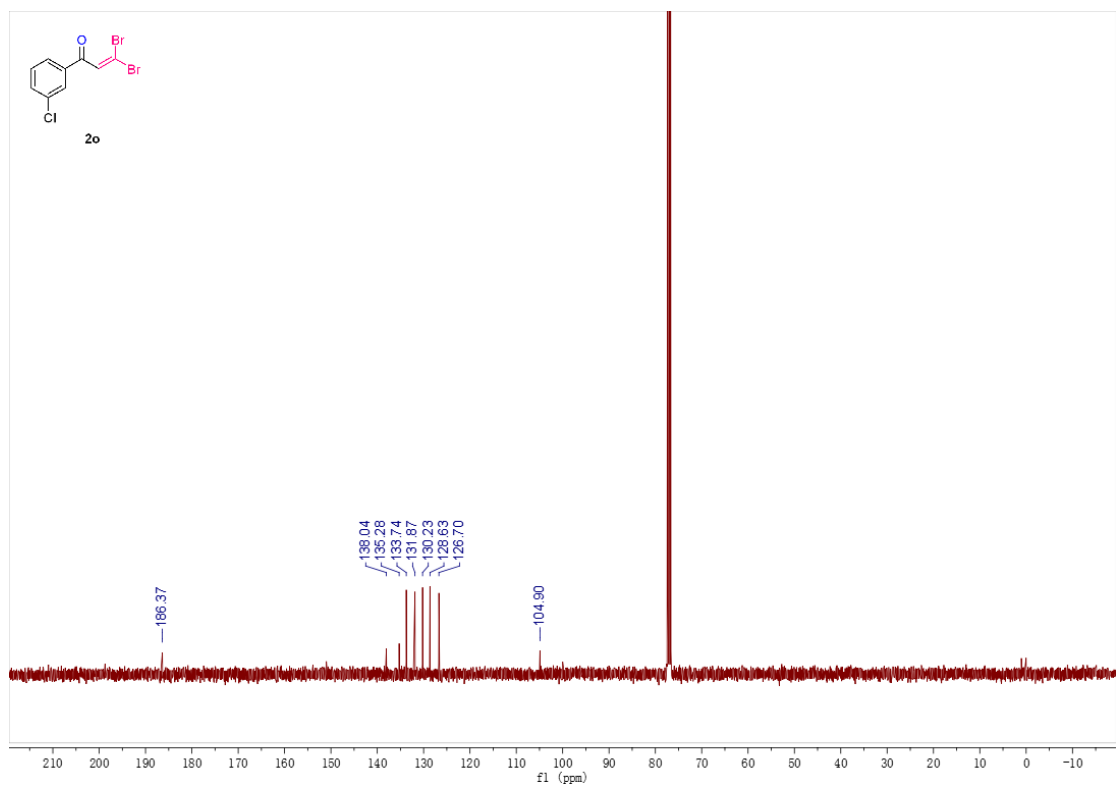

**Figure S29.**  $^1\text{H}$  NMR and  $^{13}\text{C}\{^1\text{H}\}$  NMR of **2o**.

## Single Mass Analysis

Tolerance = 10.0 PPM / DBE: min = -1.5, max = 50.0

Element prediction: Off

Number of isotope peaks used for i-FIT = 3

Monoisotopic Mass, Even Electron Ions

182 formula(e) evaluated with 1 results within limits (all results (up to 1000) for each mass)

Elements Used:

C: 9-9 H: 0-60 N: 0-6 O: 0-20 Si: 0-3 Cl: 1-3 Br: 2-3

12

0521-1-5 79 (0.480)

1: TOF MS ES+  
9.07e+002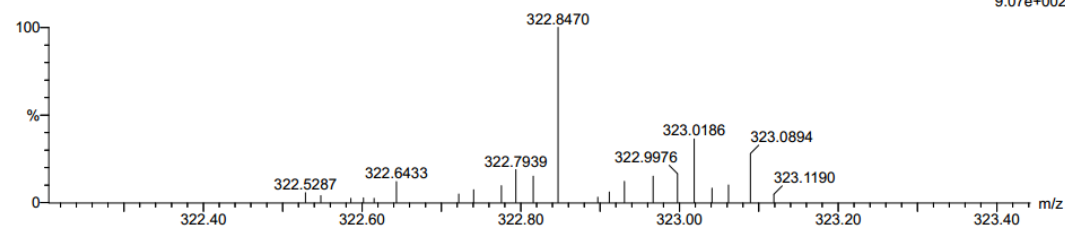Minimum: -1.5  
Maximum: 5.0 10.0 50.0

| Mass     | Calc. Mass | mDa  | PPM  | DBE | i-FIT | Norm | Conf (%) | Formula        |
|----------|------------|------|------|-----|-------|------|----------|----------------|
| 322.8470 | 322.8474   | -0.4 | -1.2 | 5.5 | 116.5 | n/a  | n/a      | C9 H6 O Cl Br2 |

Figure S30. HRMS Spectra of 2o.

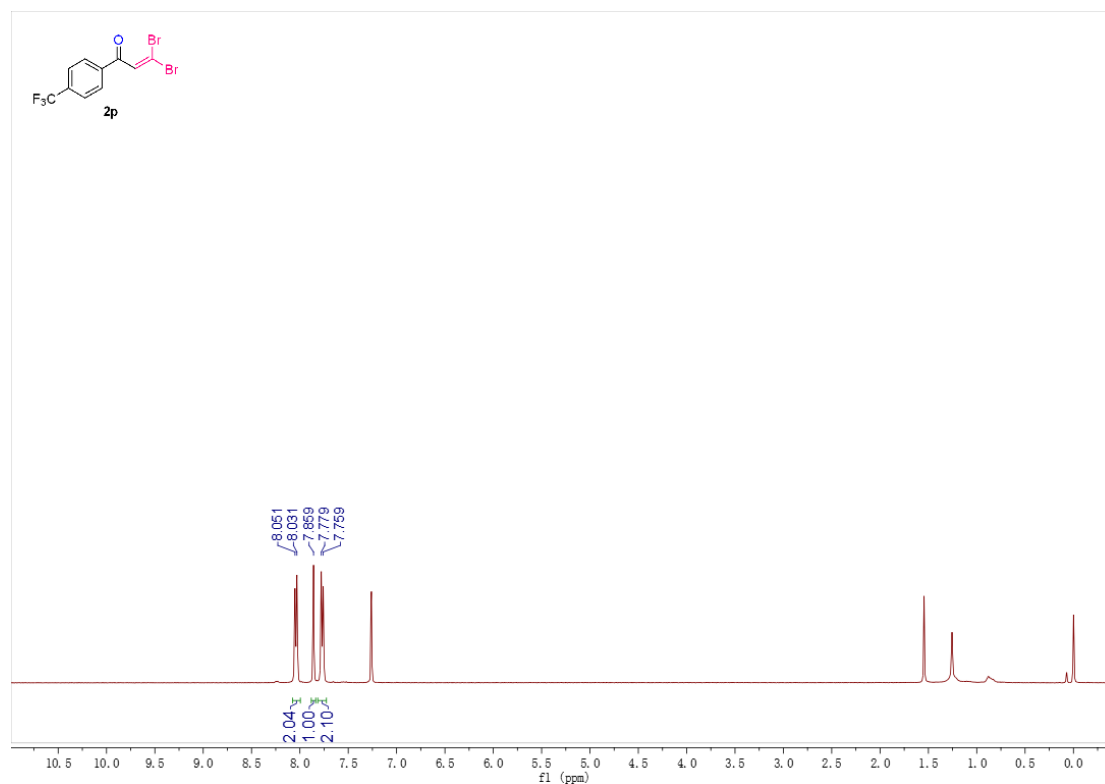

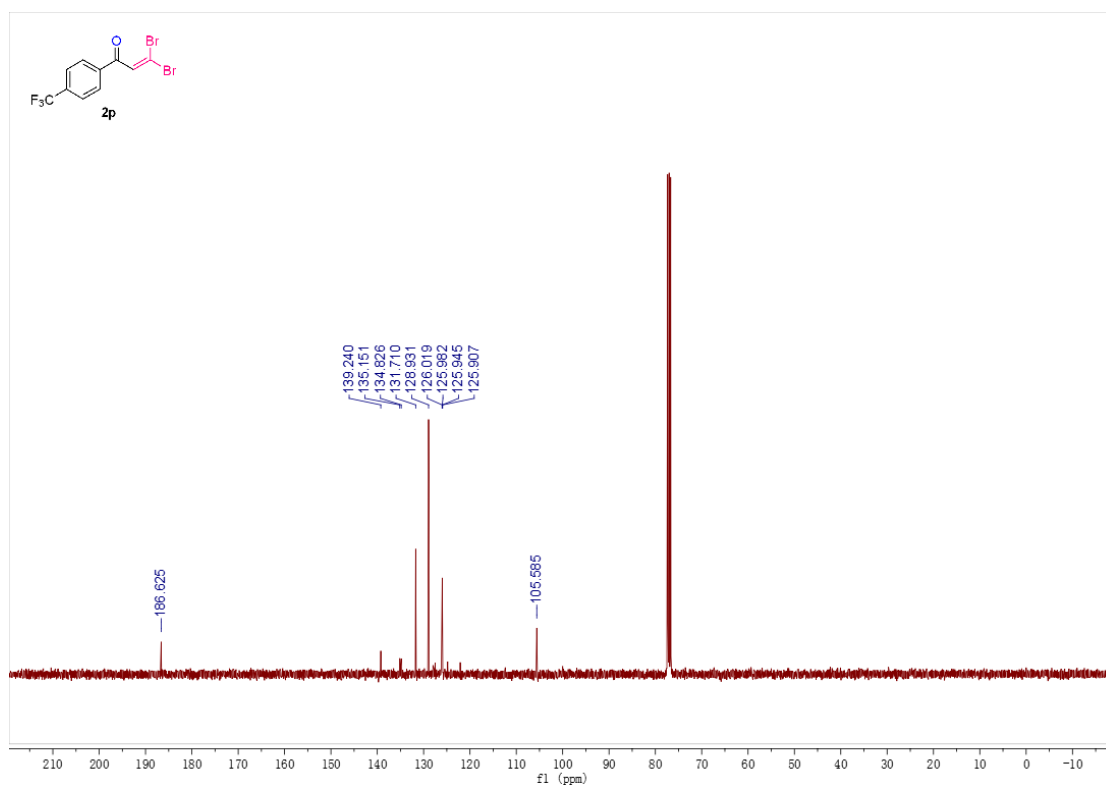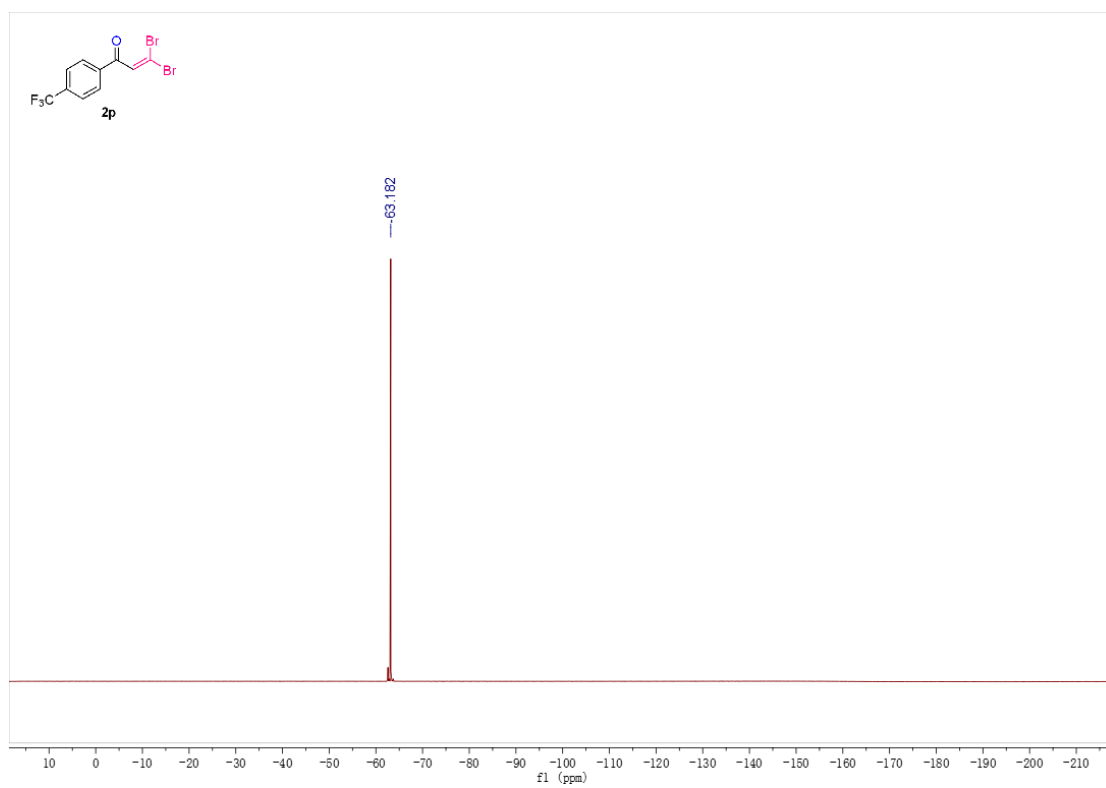

Figure S31.  $^1\text{H}$  NMR and  $^{13}\text{C}\{^1\text{H}\}$  NMR and  $^{19}\text{F}$  NMR of **2p**.

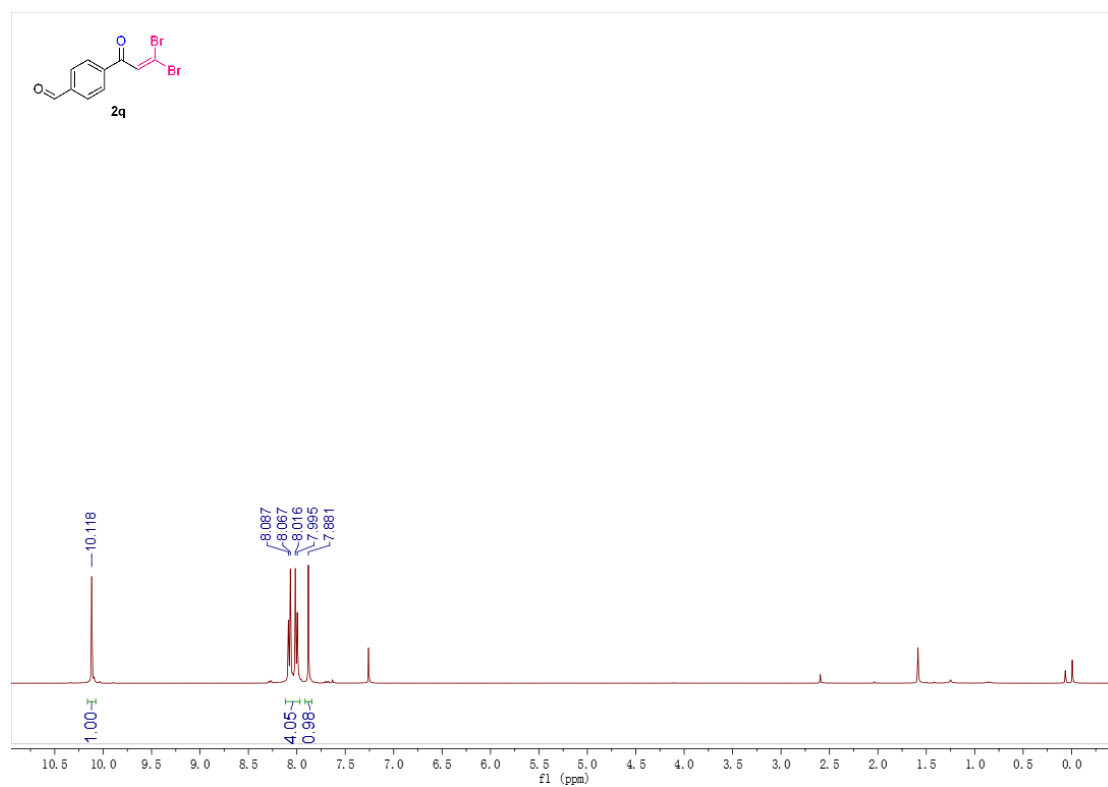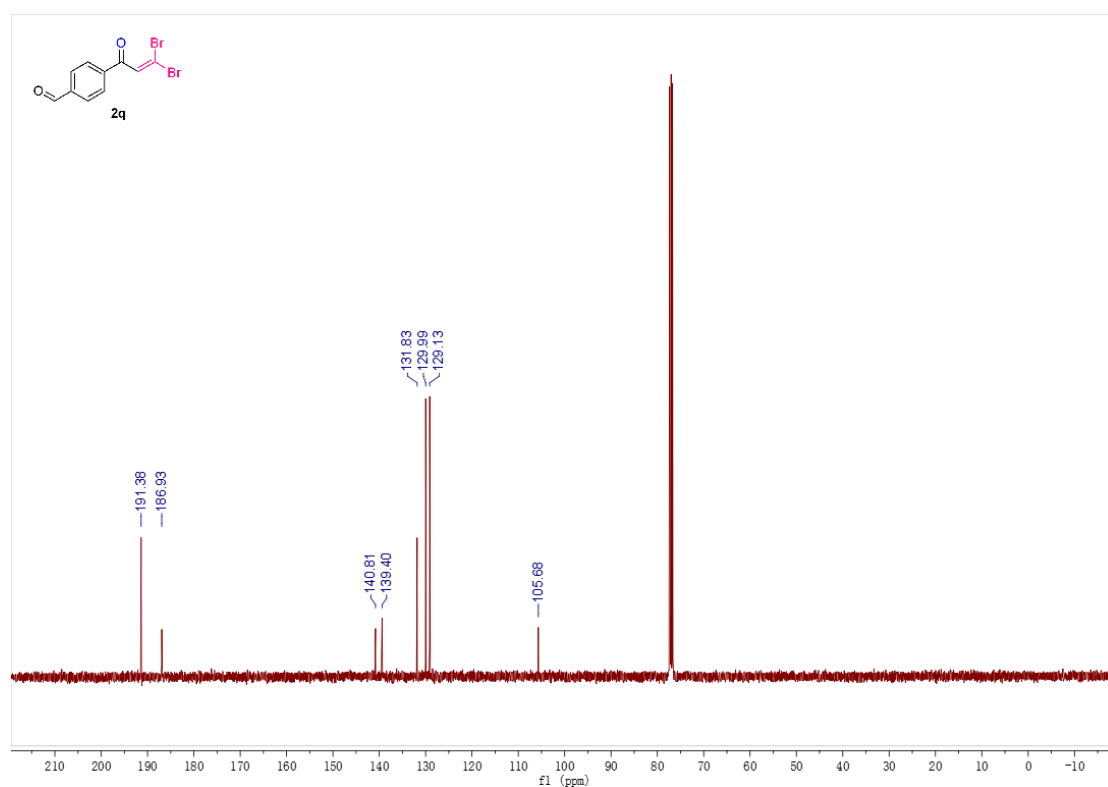

Figure S32. <sup>1</sup>H NMR and <sup>13</sup>C{<sup>1</sup>H} NMR of 2q.

## Single Mass Analysis

Tolerance = 10.0 PPM / DBE: min = -1.5, max = 50.0

Element prediction: Off

Number of isotope peaks used for i-FIT = 3

Monoisotopic Mass, Even Electron Ions

175 formula(e) evaluated with 1 results within limits (all results (up to 1000) for each mass)

Elements Used:

C: 10-10 H: 0-60 N: 0-6 O: 0-20 Si: 0-3 Br: 2-3

12

0521-1-2 61 (0.377)

1: TOF MS ES+  
8.88e+002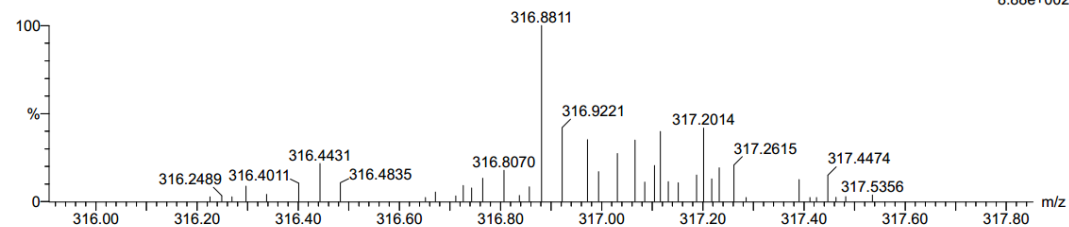Minimum: -1.5  
Maximum: 5.0 10.0 50.0

| Mass     | Calc. Mass | mDa  | PPM  | DBE | i-FIT | Norm | Conf (%) | Formula       |
|----------|------------|------|------|-----|-------|------|----------|---------------|
| 316.8811 | 316.8813   | -0.2 | -0.6 | 6.5 | 238.9 | n/a  | n/a      | C10 H7 O2 Br2 |

Figure S33. HRMS Spectra of 2q.

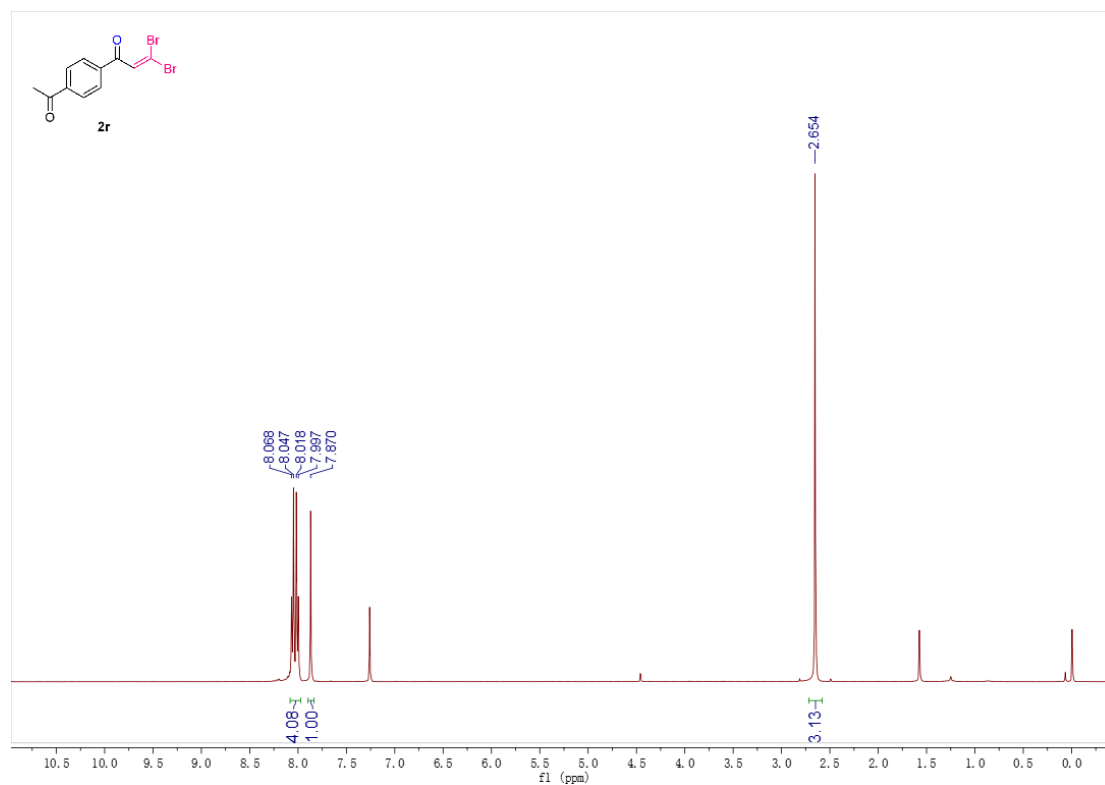

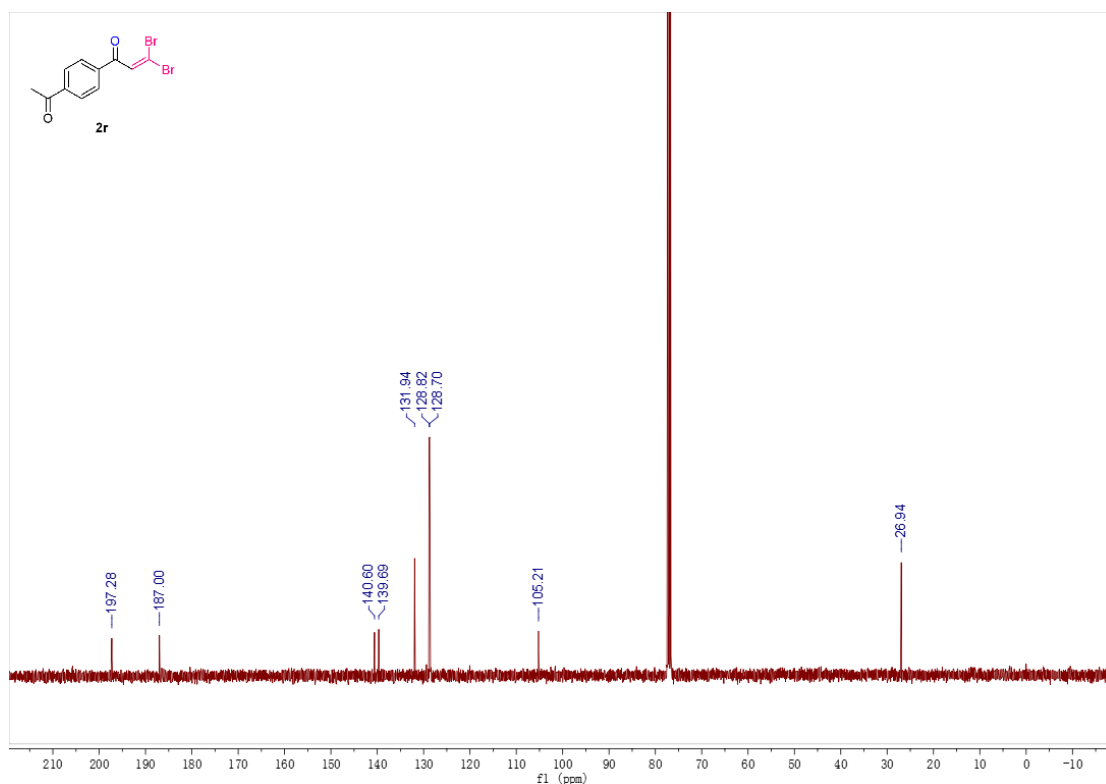

Figure S34. <sup>1</sup>H NMR and <sup>13</sup>C{<sup>1</sup>H} NMR of **2r**.

Elemental Composition Report

Page 1

Single Mass Analysis

Tolerance = 10.0 PPM / DBE: min = -1.5, max = 50.0

Element prediction: Off

Number of isotope peaks used for i-FIT = 3

Monoisotopic Mass, Even Electron Ions

216 formula(e) evaluated with 1 results within limits (all results (up to 1000) for each mass)

Elements Used:

C: 11-11 H: 0-60 N: 0-6 O: 0-20 Si: 0-3 Br: 2-3

12

0521-1-7 56 (0.343)

1: TOF MS ES+  
8.32e+003

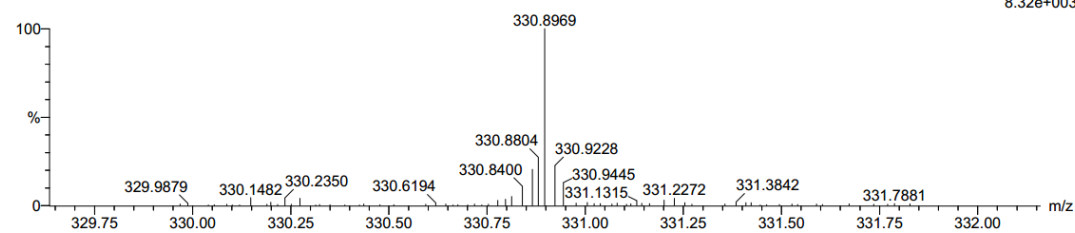

Minimum: -1.5  
Maximum: 50.0

| Mass     | Calc. Mass | mDa | PPM | DBE | i-FIT | Norm | Conf (%) | Formula       |
|----------|------------|-----|-----|-----|-------|------|----------|---------------|
| 330.8969 | 330.8969   | 0.0 | 0.0 | 6.5 | 332.8 | n/a  | n/a      | C11 H9 O2 Br2 |

Figure S35. HRMS Spectra of **2r**.

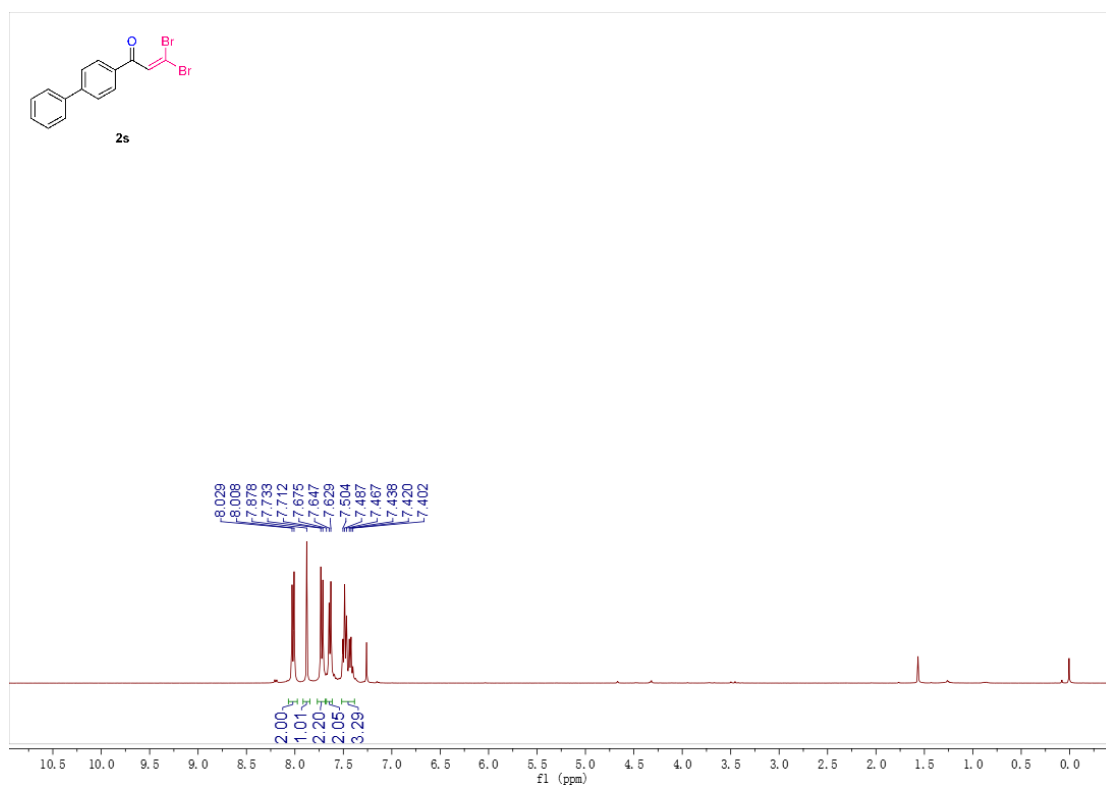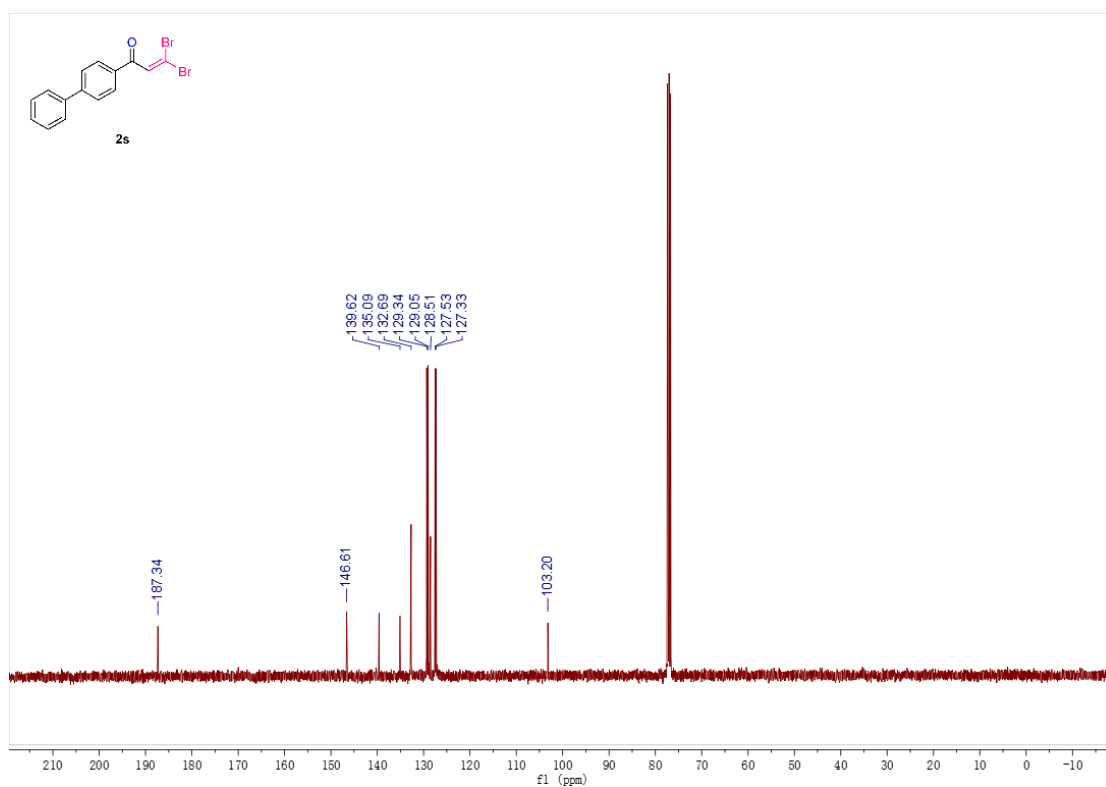

**Figure S36.**  $^1\text{H}$  NMR and  $^{13}\text{C}\{^1\text{H}\}$  NMR of **2s**.

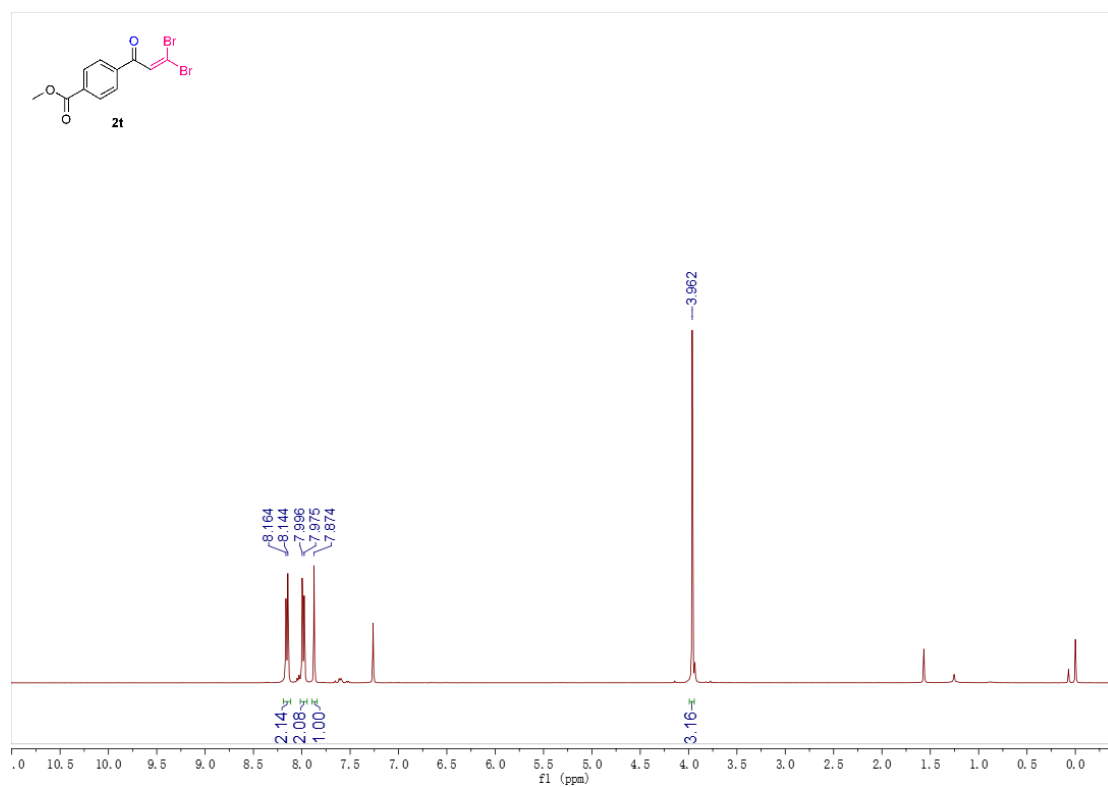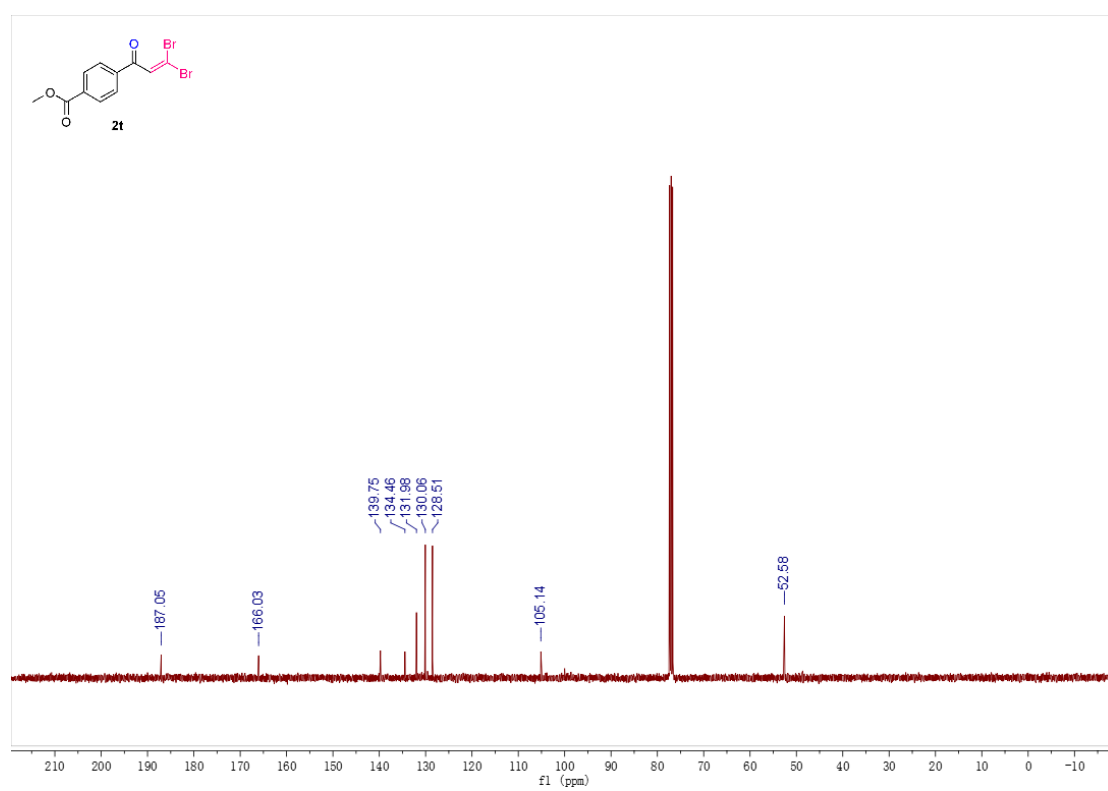

**Figure S37.** <sup>1</sup>H NMR and <sup>13</sup>C{<sup>1</sup>H} NMR of **2t**.



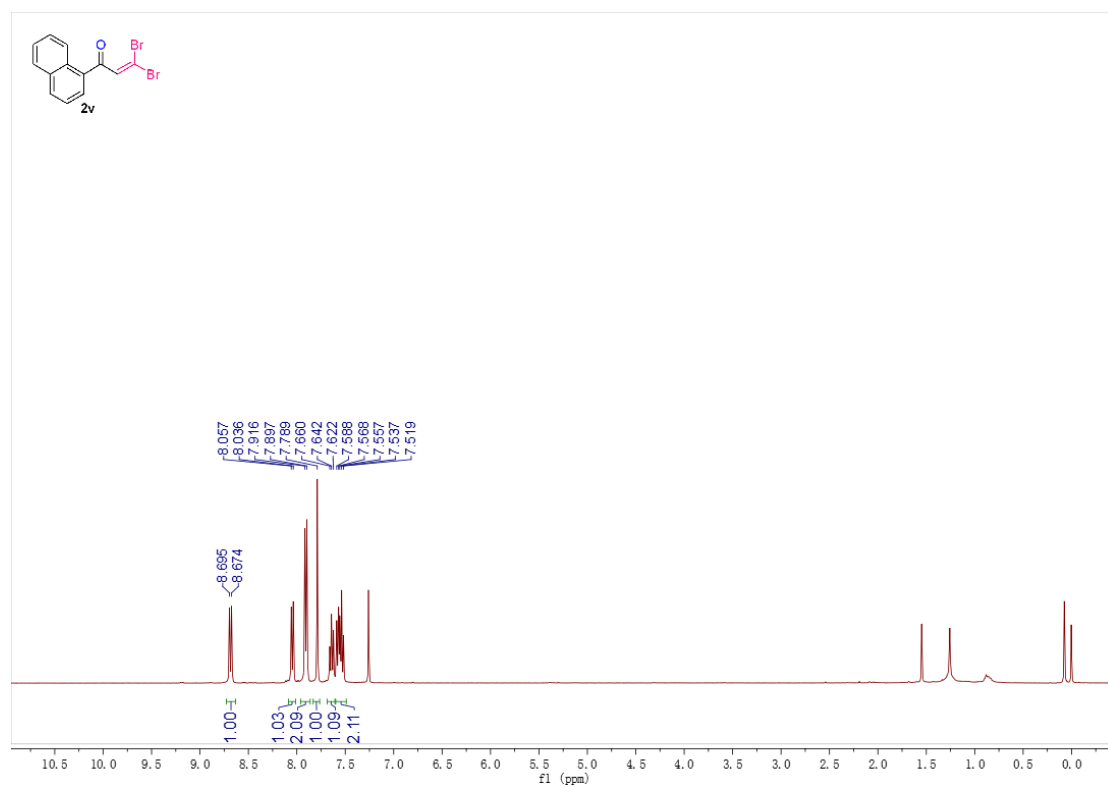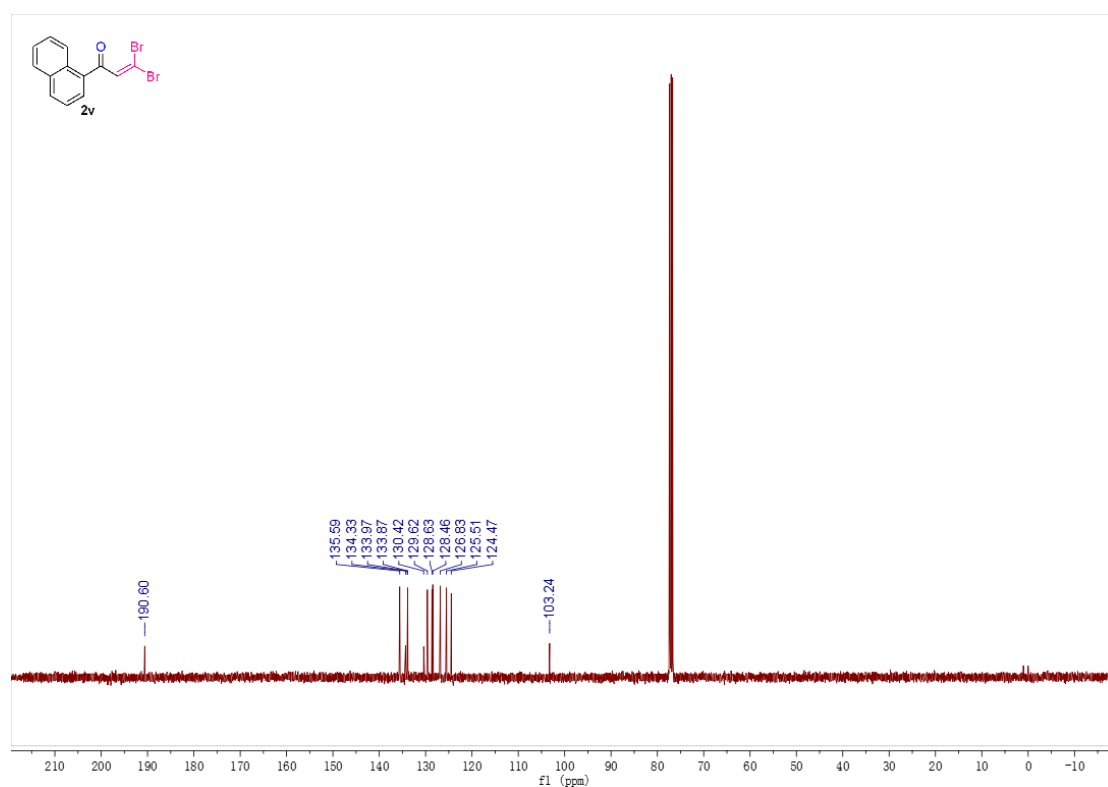

**Figure S38.**  $^1\text{H}$  NMR and  $^{13}\text{C}\{^1\text{H}\}$  NMR of **2v**.

## Single Mass Analysis

Tolerance = 10.0 PPM / DBE: min = -1.5, max = 50.0

Element prediction: Off

Number of isotope peaks used for i-FIT = 3

Monoisotopic Mass, Even Electron Ions

241 formula(e) evaluated with 1 results within limits (all results (up to 1000) for each mass)

Elements Used:

C: 13-13 H: 0-60 N: 0-6 O: 0-20 Si: 0-3 Br: 2-3

12

0521-1-6 84 (0.506)

1: TOF MS ES+  
2.50e+005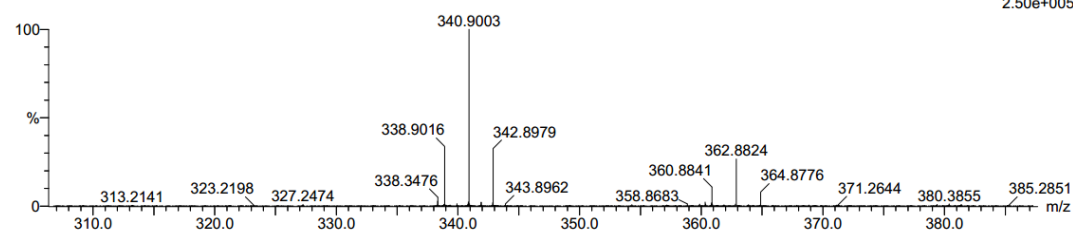Minimum: -1.5  
Maximum: 5.0 10.0 50.0

| Mass     | Calc. Mass | mDa  | PPM  | DBE | i-FIT  | Norm | Conf (%) | Formula      |
|----------|------------|------|------|-----|--------|------|----------|--------------|
| 338.9016 | 338.9020   | -0.4 | -1.2 | 8.5 | 1085.8 | n/a  | n/a      | C13 H9 O Br2 |

Figure S39. HRMS Spectra of 2v.

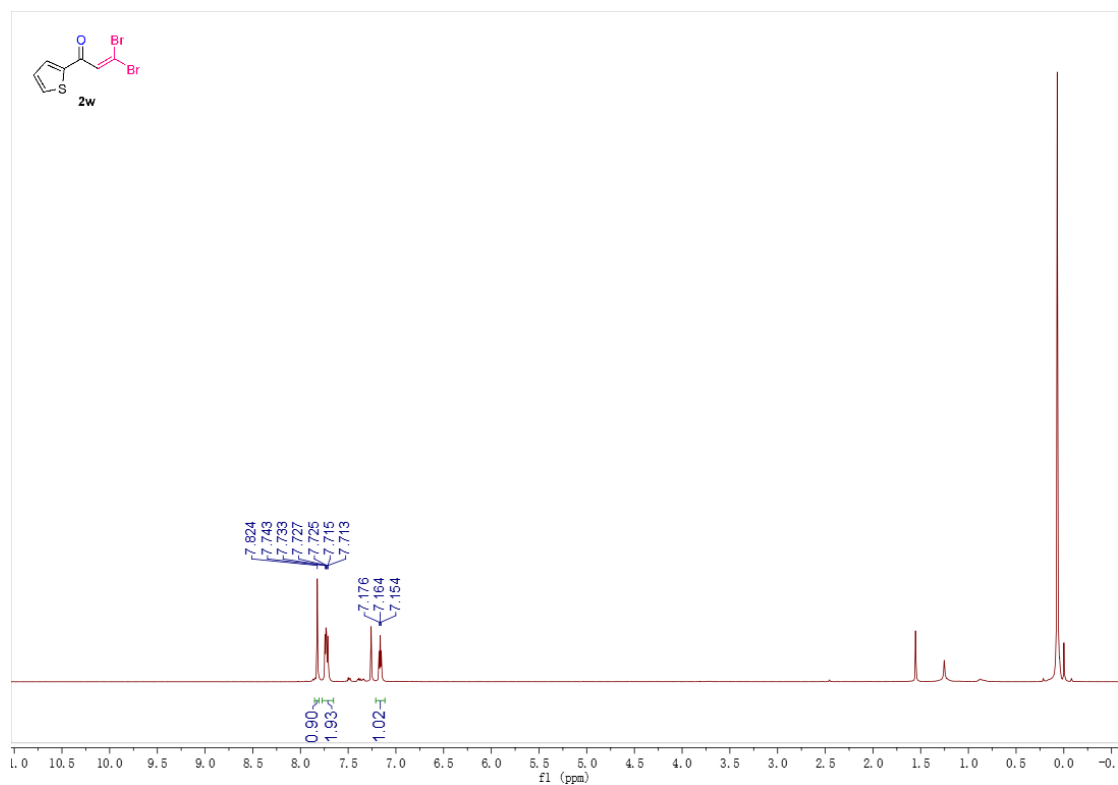

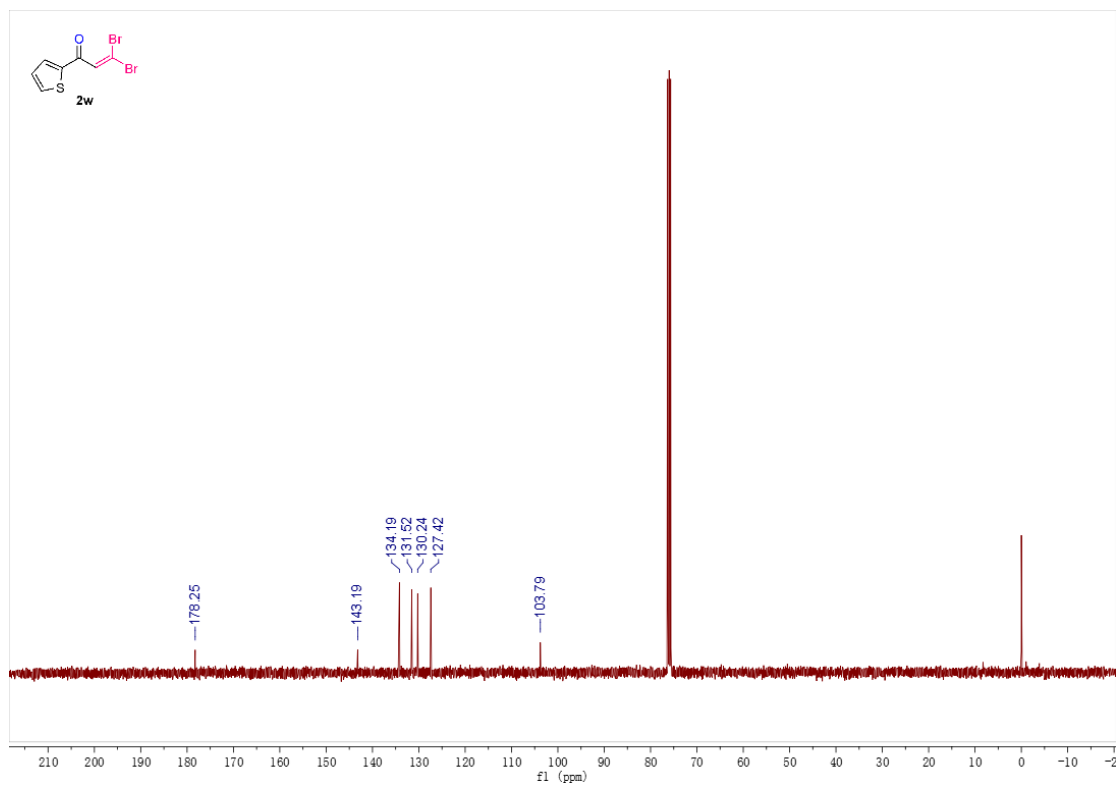

**Figure S40.**  $^1\text{H}$  NMR and  $^{13}\text{C}\{^1\text{H}\}$  NMR of **2w**.

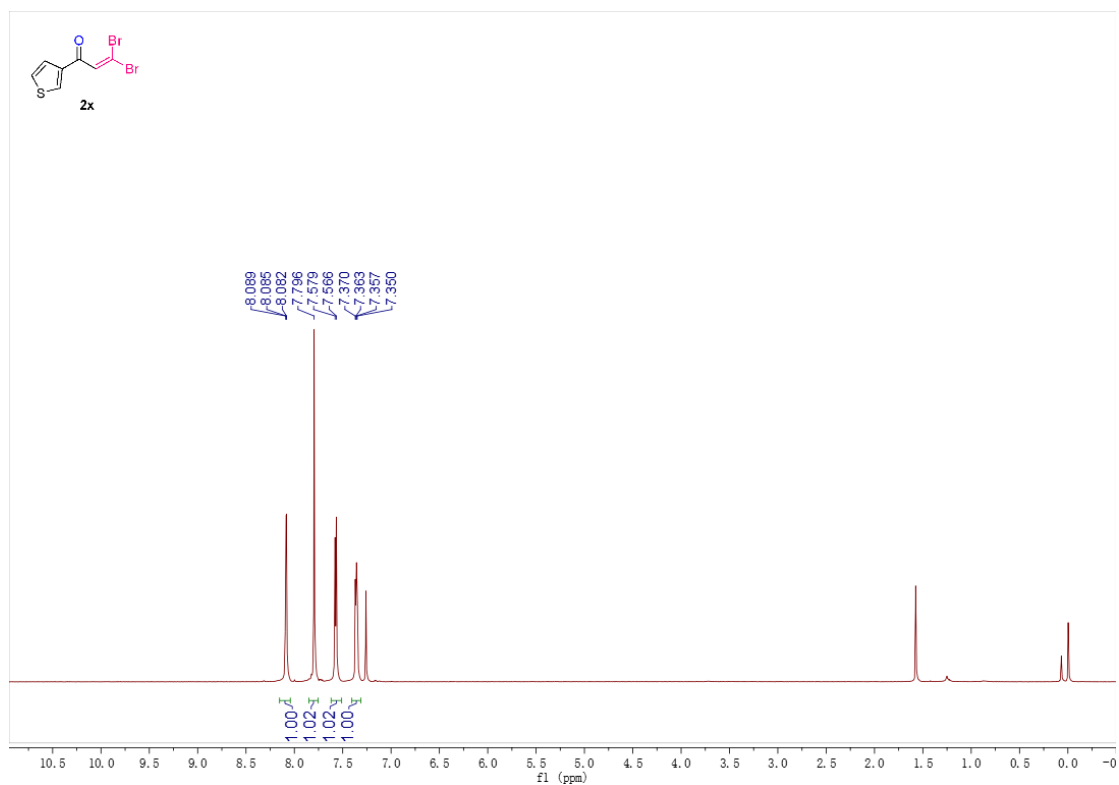

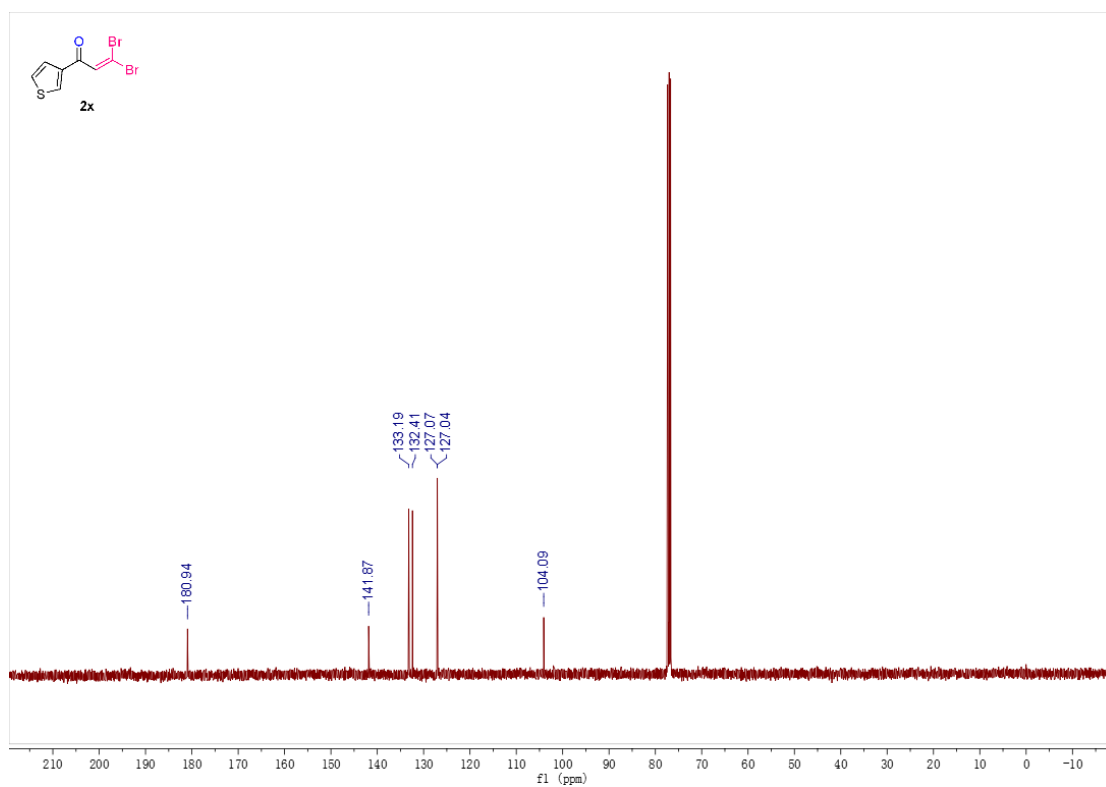

**Figure S41.**  $^1\text{H}$  NMR and  $^{13}\text{C}\{^1\text{H}\}$  NMR of **2x**.

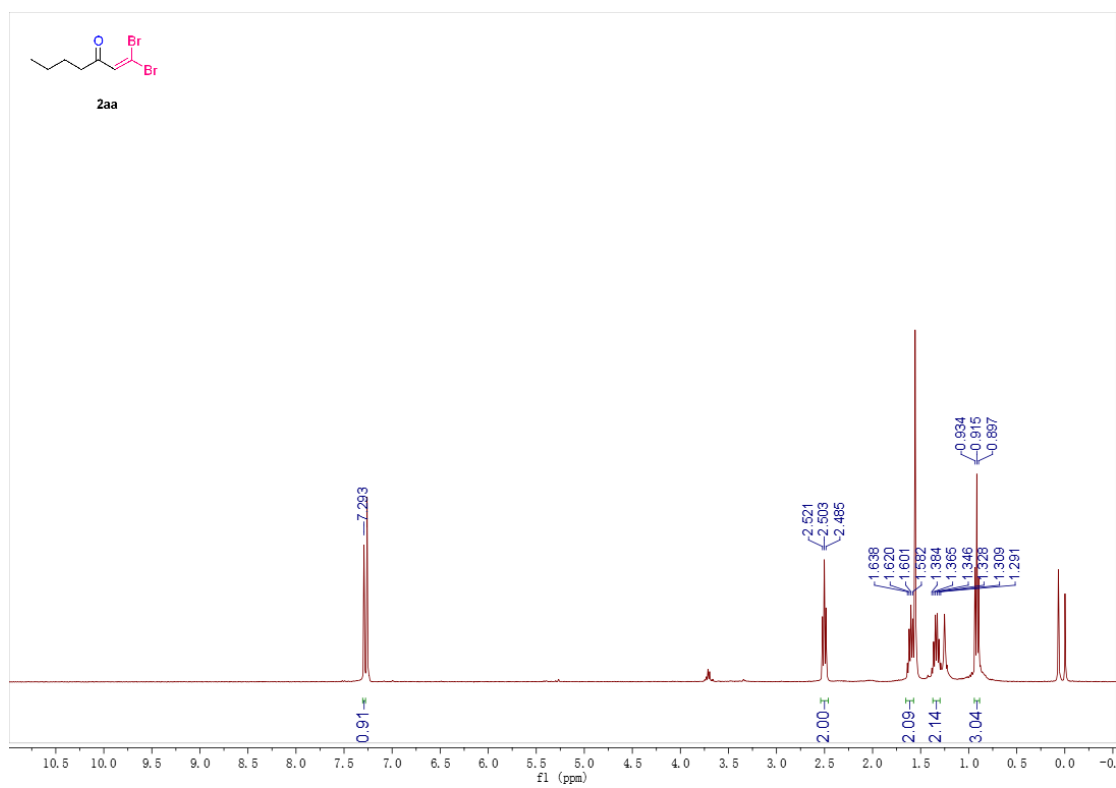

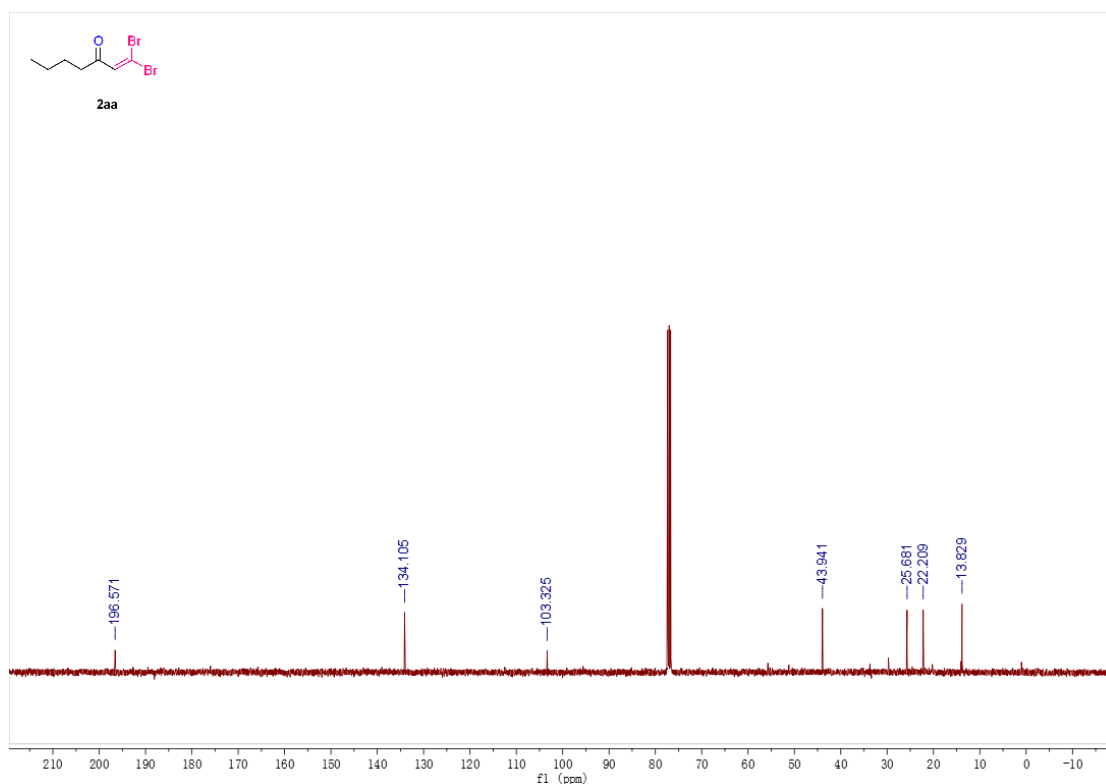

Figure S42. <sup>1</sup>H NMR and <sup>13</sup>C{<sup>1</sup>H} NMR of 2aa.

Elemental Composition Report

Page 1

Single Mass Analysis

Tolerance = 20.0 PPM / DBE: min = -1.5, max = 50.0

Element prediction: Off

Number of isotope peaks used for i-FIT = 3

Monoisotopic Mass, Even Electron Ions

198 formula(e) evaluated with 1 results within limits (up to 50 closest results for each mass)

Elements Used:

C: 7-7 H: 10-10 N: 0-8 O: 0-8 Na: 0-1 Br: 1-4

10

0707-1-485 139 (0.891)

1: TOF MS ES+  
2.46e+002

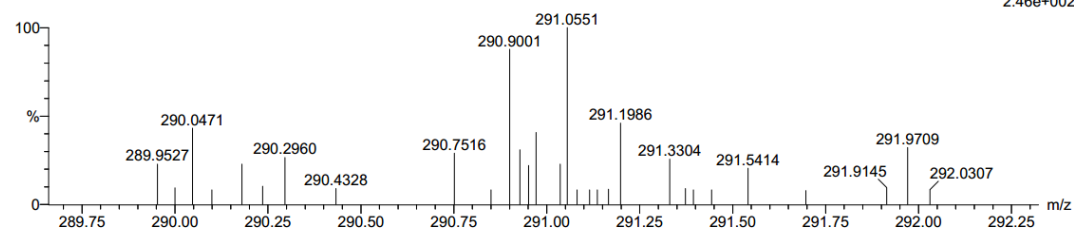

Minimum: -1.5  
Maximum: 50.0

| Mass     | Calc. Mass | mDa | PPM | DBE | i-FIT | Norm | Conf (%) | Formula         |
|----------|------------|-----|-----|-----|-------|------|----------|-----------------|
| 290.9001 | 290.8996   | 0.5 | 1.7 | 1.5 | 157.0 | n/a  | n/a      | C7 H10 O Na Br2 |

Figure S43. HRMS Spectra of 2aa.

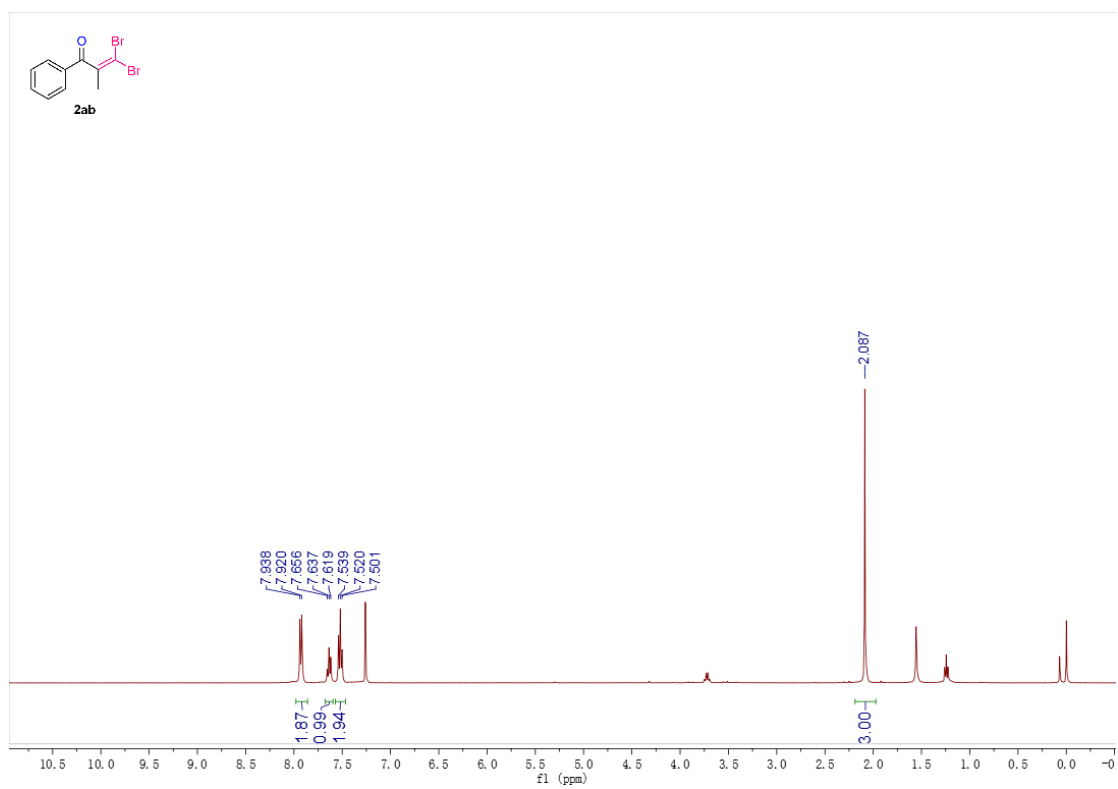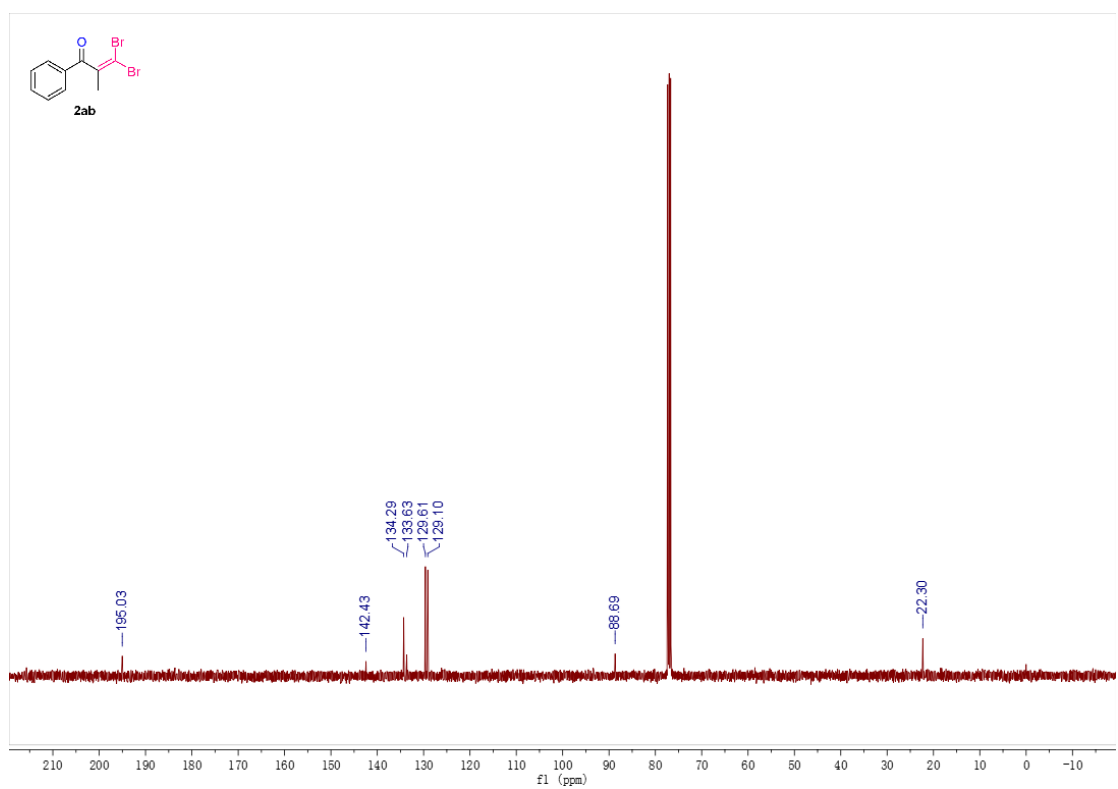

**Figure S44.**  $^1\text{H}$  NMR and  $^{13}\text{C}\{^1\text{H}\}$  NMR of **2ab**.

Single Mass Analysis

Tolerance = 10.0 PPM / DBE: min = -1.5, max = 50.0

Element prediction: Off

Number of isotope peaks used for i-FIT = 3

Monoisotopic Mass, Even Electron Ions

62 formula(e) evaluated with 1 results within limits (all results (up to 1000) for each mass)

Elements Used:

C: 10-10 H: 0-60 N: 0-6 O: 0-20 Br: 2-3

12

0521-1-9 65 (0.398)

1: TOF MS ES+  
6.13e+002

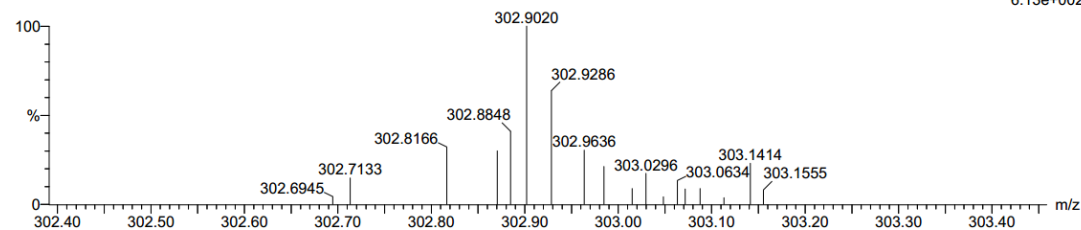

Minimum: -1.5  
Maximum: 5.0 10.0 50.0

| Mass     | Calc. Mass | mDa | PPM | DBE | i-FIT | Norm | Conf (%) | Formula      |
|----------|------------|-----|-----|-----|-------|------|----------|--------------|
| 302.9020 | 302.9020   | 0.0 | 0.0 | 5.5 | 128.5 | n/a  | n/a      | C10 H9 O Br2 |

Figure S45. HRMS Spectra of 2ab.

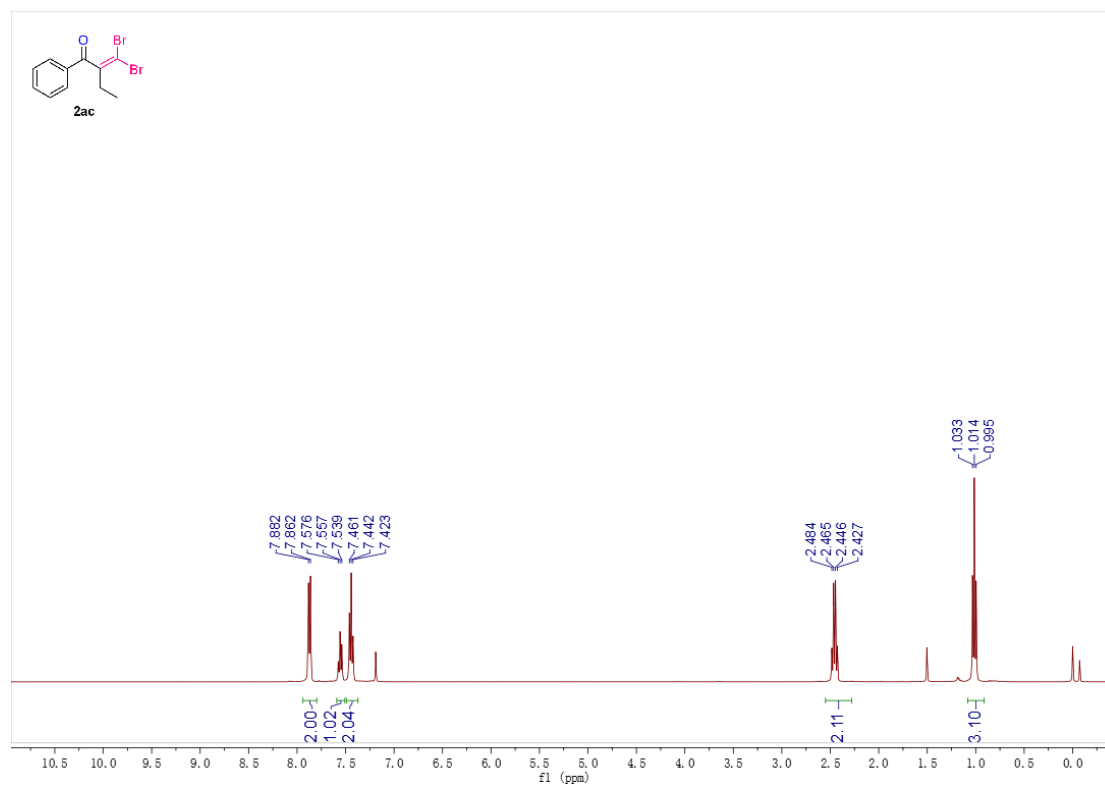

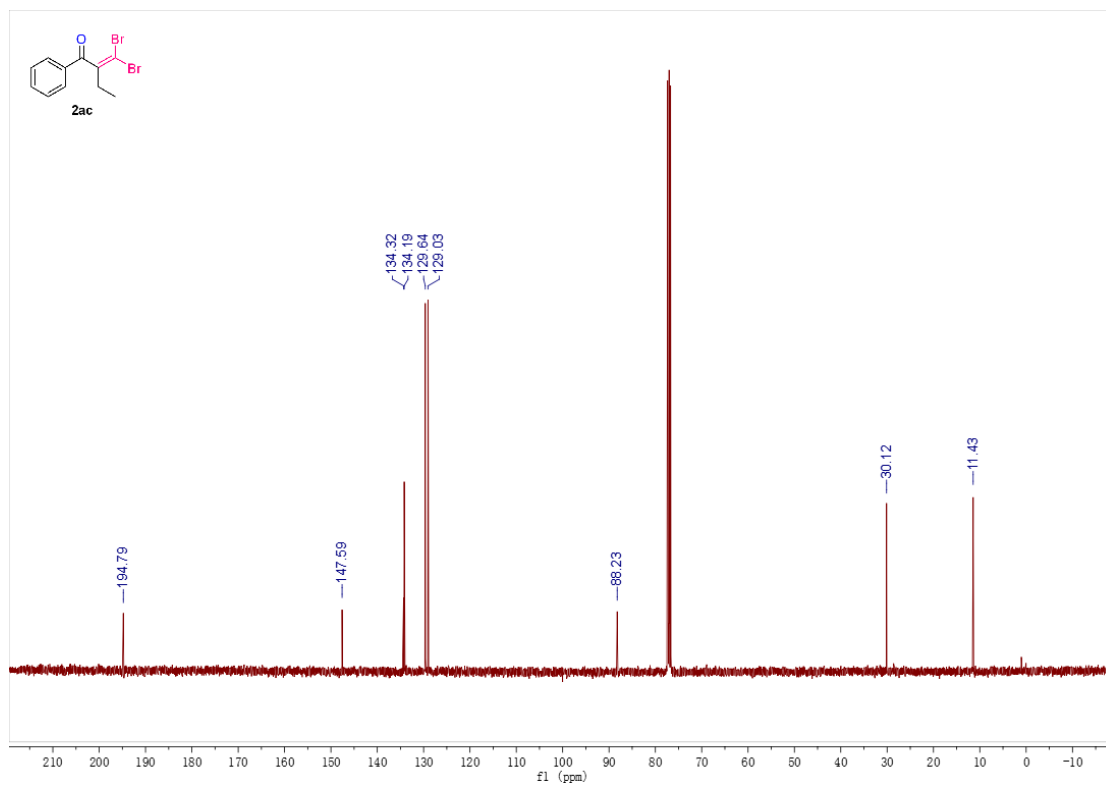

Figure S46. <sup>1</sup>H NMR and <sup>13</sup>C{<sup>1</sup>H} NMR of 2ac.

Elemental Composition Report

Page 1

Single Mass Analysis

Tolerance = 10.0 PPM / DBE: min = -1.5, max = 50.0

Element prediction: Off

Number of isotope peaks used for i-FIT = 3

Monoisotopic Mass, Even Electron Ions

78 formula(e) evaluated with 1 results within limits (all results (up to 1000) for each mass)

Elements Used:

C: 11-15 H: 0-60 N: 0-6 O: 0-20 Br: 2-3

12

0521-1-11 77 (0.469)

1: TOF MS ES+  
3.97e+005

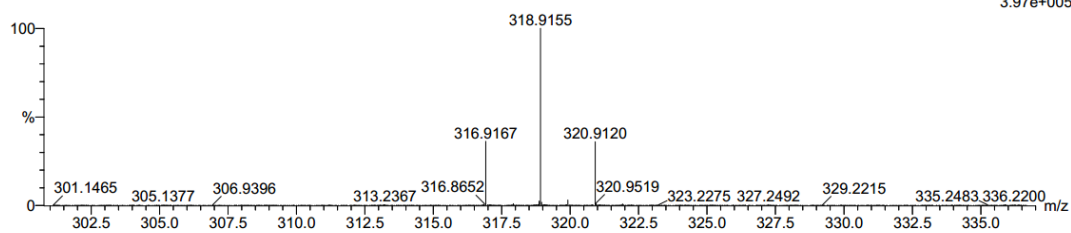

Minimum: -1.5  
Maximum: 5.0 10.0 50.0

| Mass     | Calc. Mass | mDa  | PPM  | DBE | i-FIT  | Norm | Conf (%) | Formula       |
|----------|------------|------|------|-----|--------|------|----------|---------------|
| 316.9167 | 316.9177   | -1.0 | -3.2 | 5.5 | 1074.5 | n/a  | n/a      | C11 H11 O Br2 |

Figure S47. HRMS Spectra of 2ac.



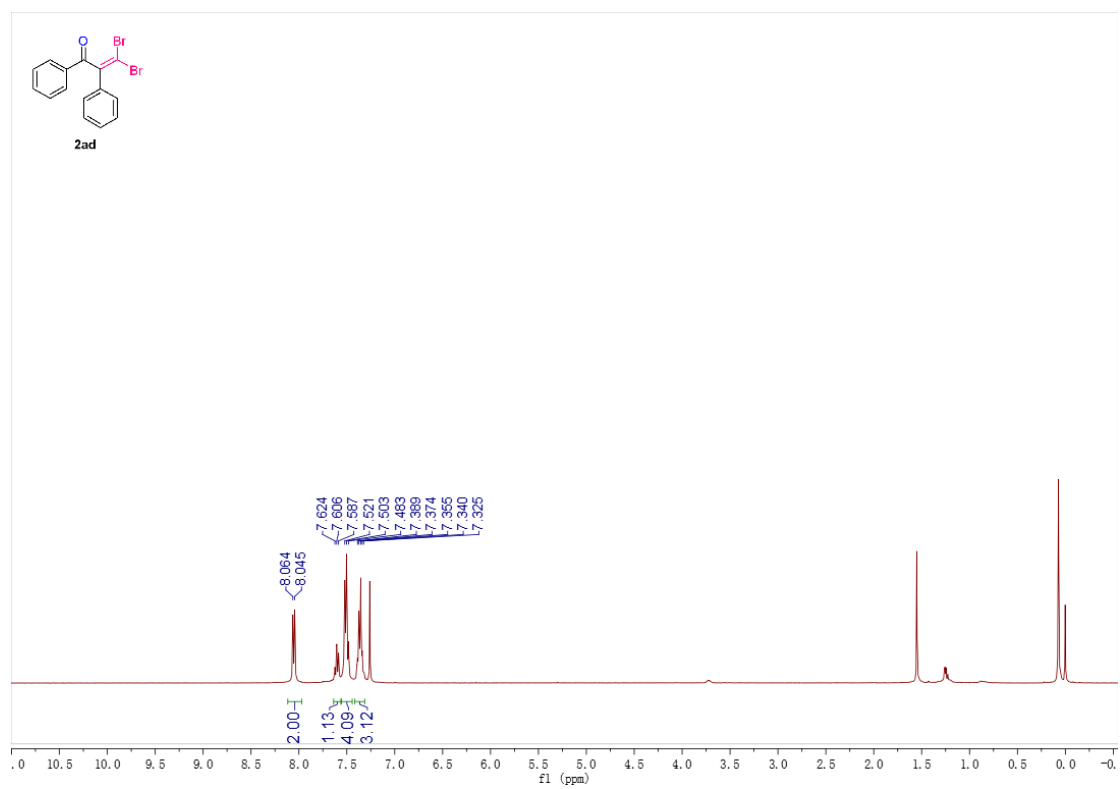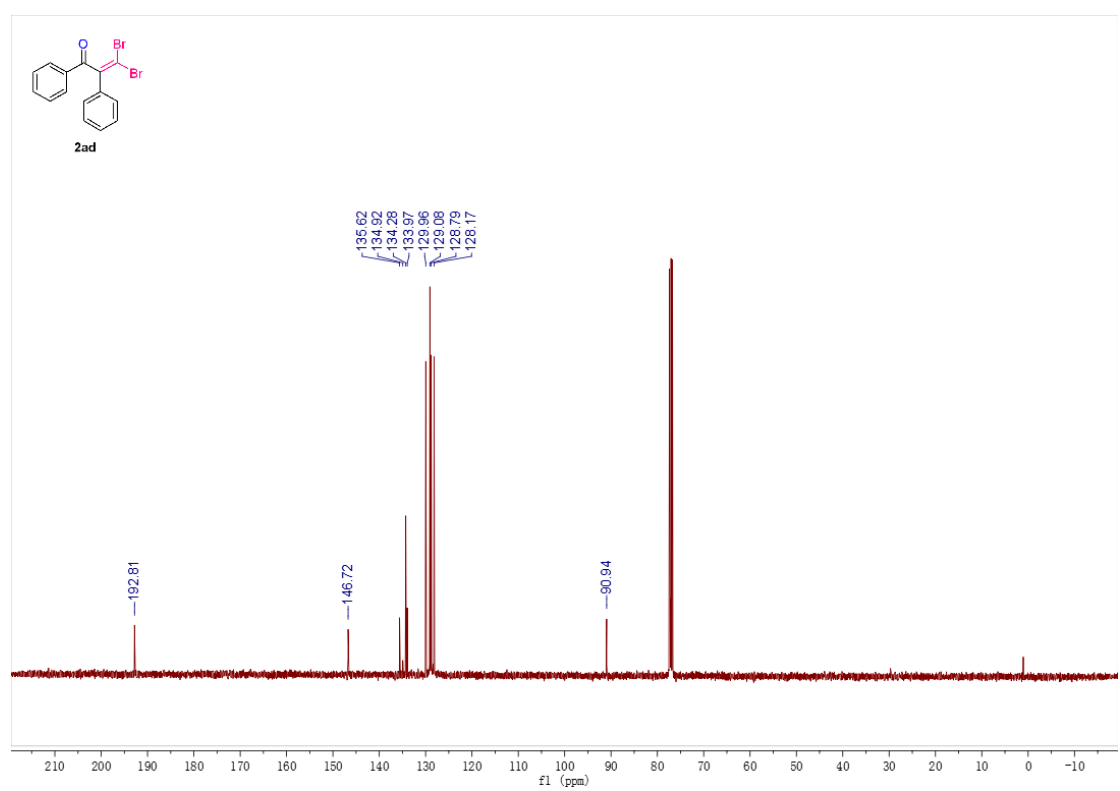

**Figure S48.**  $^1\text{H}$  NMR and  $^{13}\text{C}\{^1\text{H}\}$  NMR of **2ad**.

## Single Mass Analysis

Tolerance = 10.0 PPM / DBE: min = -1.5, max = 50.0

Element prediction: Off

Number of isotope peaks used for i-FIT = 3

Monoisotopic Mass, Even Electron Ions

116 formula(e) evaluated with 1 results within limits (all results (up to 1000) for each mass)

Elements Used:

C: 15-15 H: 0-60 N: 0-6 O: 0-20 Br: 2-3

12

0521-1-10 82 (0.495)

1: TOF MS ES+  
1.90e+005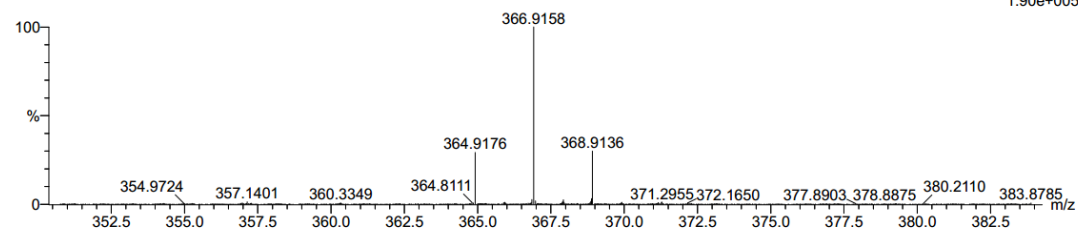Minimum: -1.5  
Maximum: 5.0 10.0 50.0

| Mass     | Calc. Mass | mDa  | PPM  | DBE | i-FIT | Norm | Conf (%) | Formula       |
|----------|------------|------|------|-----|-------|------|----------|---------------|
| 364.9176 | 364.9177   | -0.1 | -0.3 | 9.5 | 953.4 | n/a  | n/a      | C15 H11 O Br2 |

Figure S49. HRMS Spectra of 2ad.

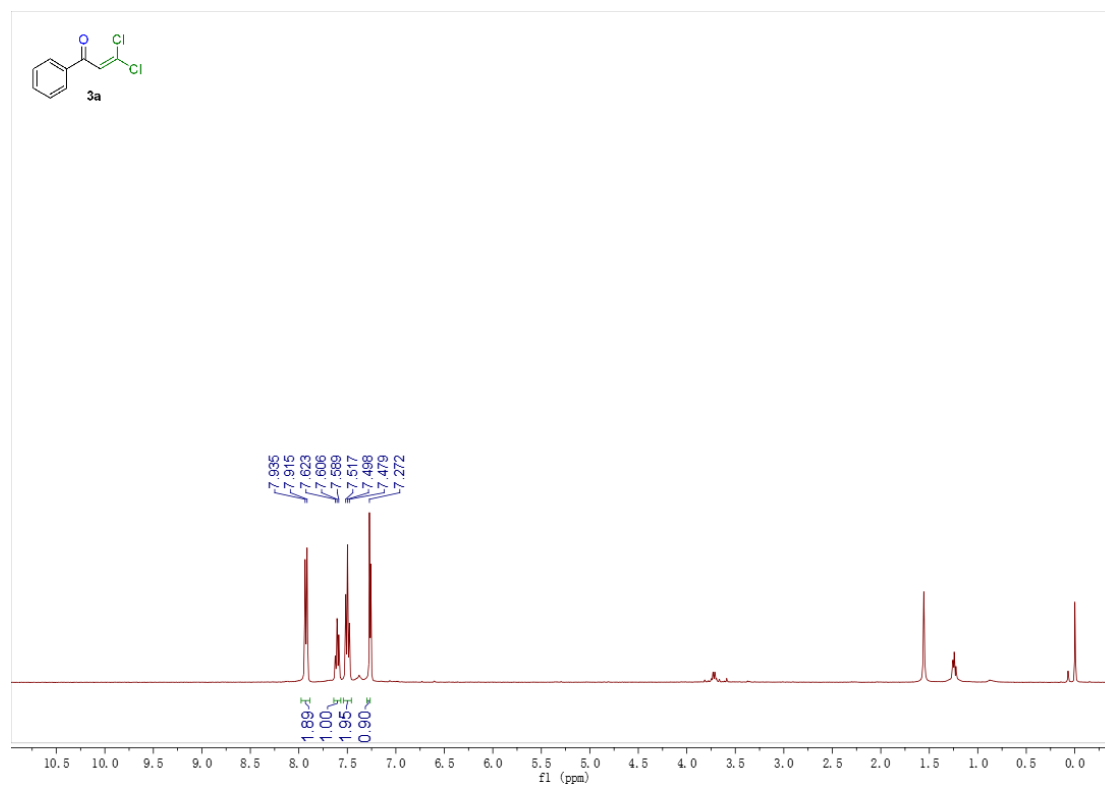

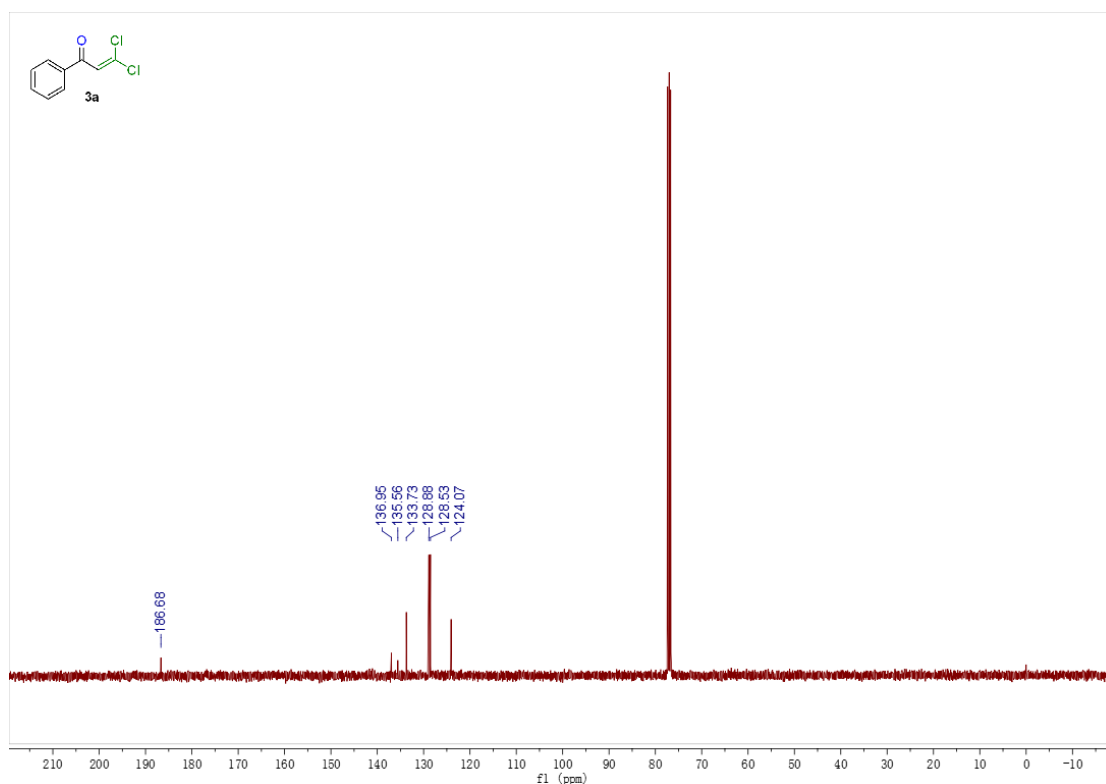

Figure S50. <sup>1</sup>H NMR and <sup>13</sup>C{<sup>1</sup>H} NMR of 3a.

Elemental Composition Report

Page 1

Single Mass Analysis

Tolerance = 10.0 PPM / DBE: min = -1.5, max = 50.0

Element prediction: Off

Number of isotope peaks used for i-FIT = 3

Monoisotopic Mass, Even Electron Ions

124 formula(e) evaluated with 1 results within limits (all results (up to 1000) for each mass)

Elements Used:

C: 9-9 H: 0-60 N: 0-6 O: 0-20 Cl: 1-3

12

0521-1-12 122 (0.729)

1: TOF MS ES+  
3.49e+002

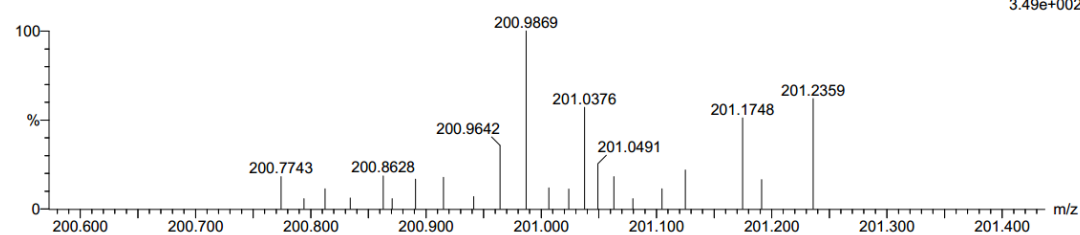

Minimum: -1.5  
Maximum: 5.0 10.0 50.0

| Mass     | Calc. Mass | mDa  | PPM  | DBE | i-FIT | Norm | Conf (%) | Formula     |
|----------|------------|------|------|-----|-------|------|----------|-------------|
| 200.9869 | 200.9874   | -0.5 | -2.5 | 5.5 | 115.6 | n/a  | n/a      | C9 H7 O Cl2 |

Figure S51. HRMS Spectra of 3a.

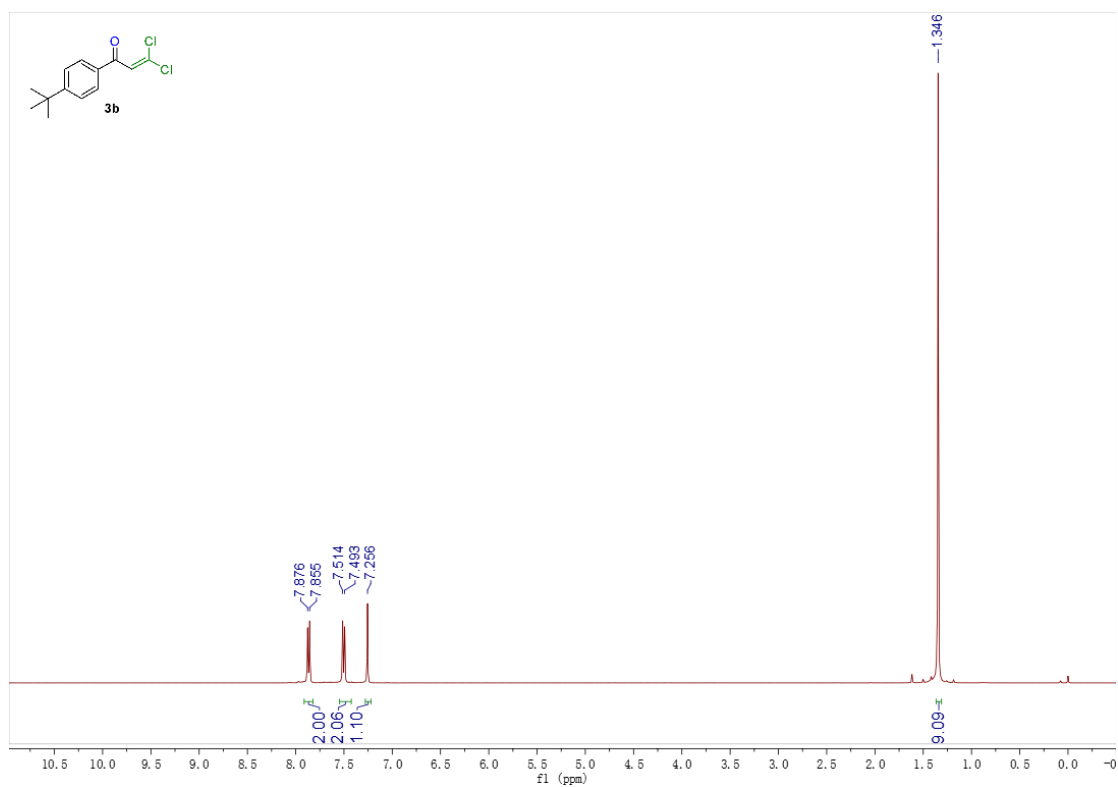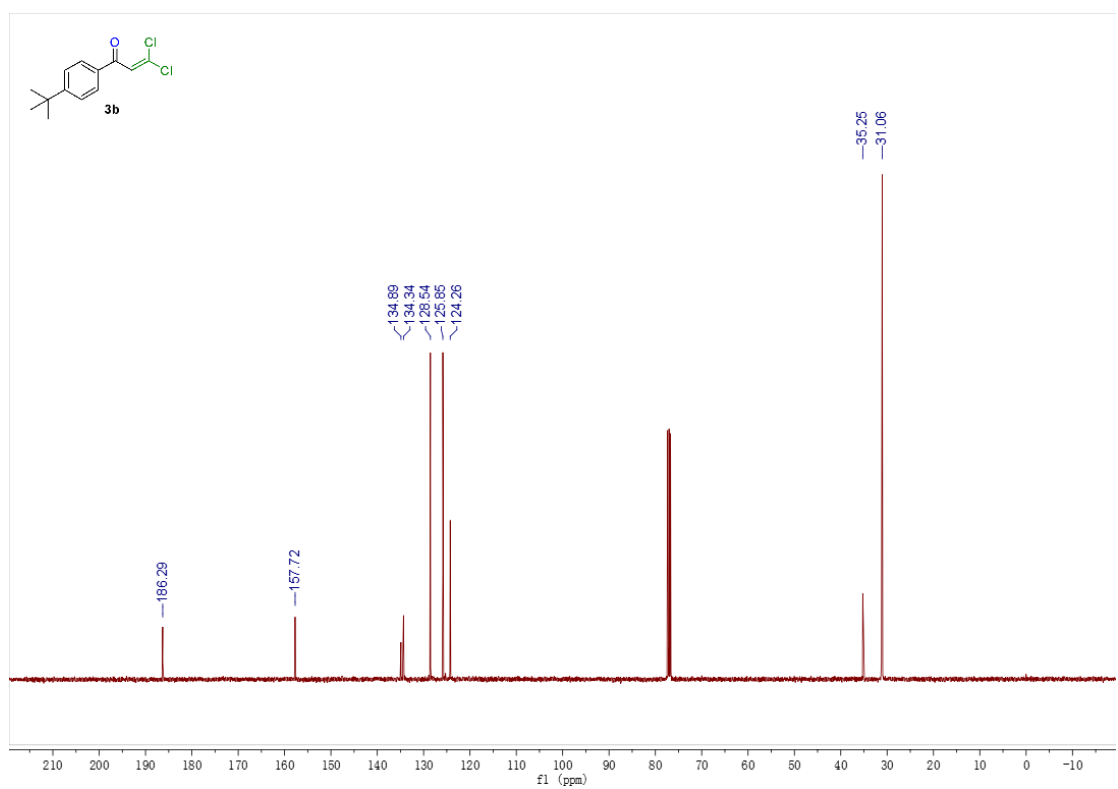

**Figure S52.**  $^1\text{H}$  NMR and  $^{13}\text{C}\{^1\text{H}\}$  NMR of **3b**.

## Single Mass Analysis

Tolerance = 10.0 PPM / DBE: min = -1.5, max = 50.0

Element prediction: Off

Number of isotope peaks used for i-FIT = 3

Monoisotopic Mass, Even Electron Ions

199 formula(e) evaluated with 1 results within limits (all results (up to 1000) for each mass)

Elements Used:

C: 13-13 H: 0-60 N: 0-6 O: 0-20 Cl: 1-3

12

0521-1-14 115 (0.692)

1: TOF MS ES+  
6.11e+004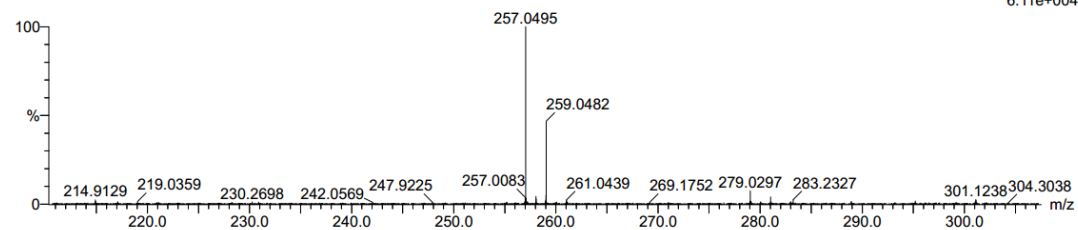Minimum: -1.5  
Maximum: 5.0 10.0 50.0

| Mass     | Calc. Mass | mDa  | PPM  | DBE | i-FIT  | Norm | Conf (%) | Formula       |
|----------|------------|------|------|-----|--------|------|----------|---------------|
| 257.0495 | 257.0500   | -0.5 | -1.9 | 5.5 | 1010.0 | n/a  | n/a      | C13 H15 O Cl2 |

Figure S53. HRMS Spectra of 3b.

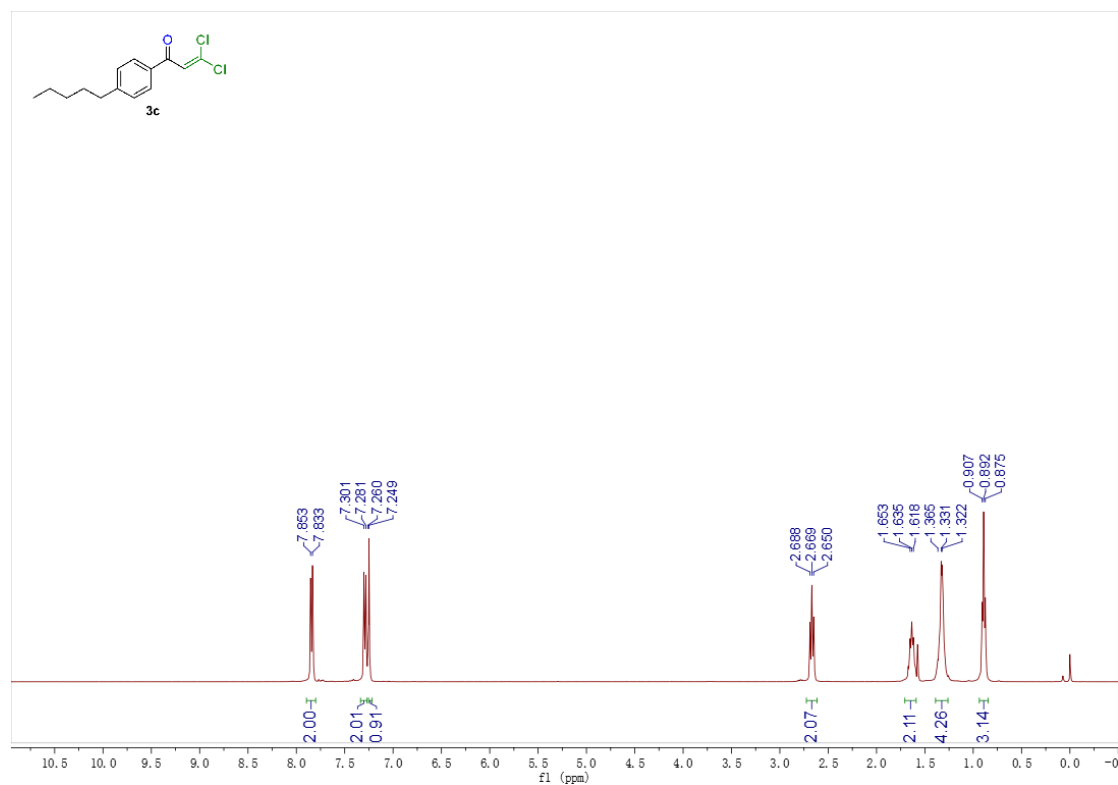

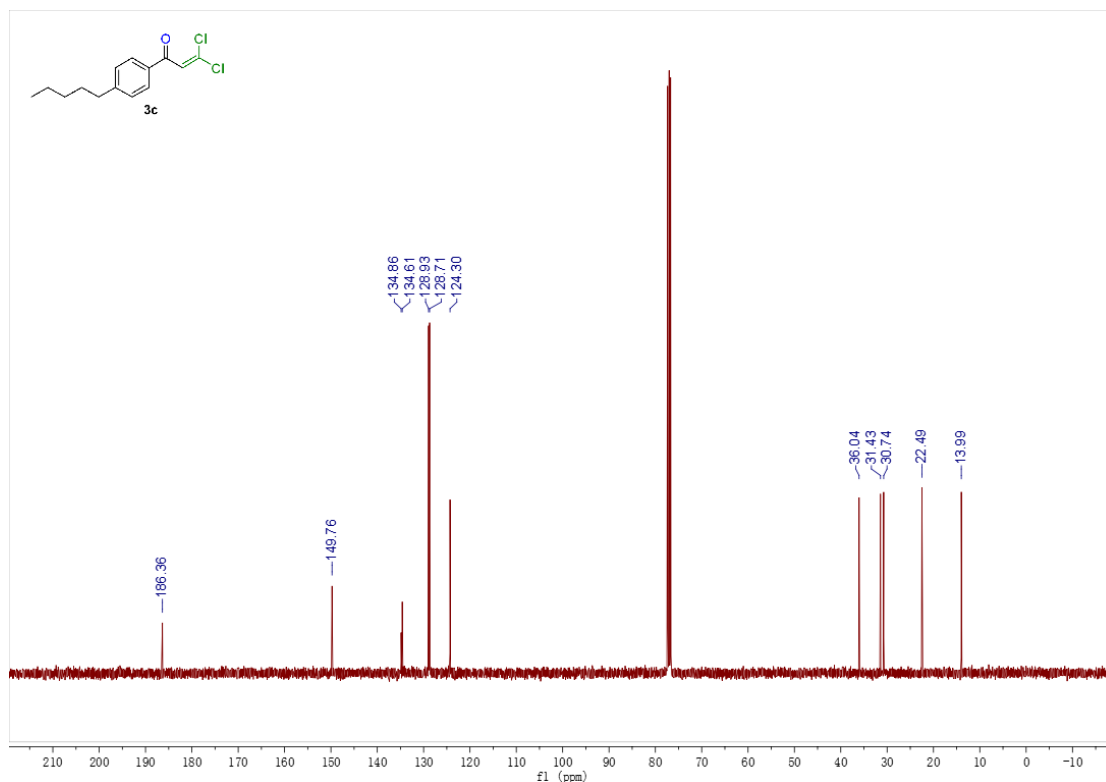

Figure S54.  $^1\text{H}$  NMR and  $^{13}\text{C}\{^1\text{H}\}$  NMR of **3c**.

#### Elemental Composition Report

Page 1

#### Single Mass Analysis

Tolerance = 5.0 PPM / DBE: min = -1.5, max = 50.0

Element prediction: Off

Number of isotope peaks used for i-FIT = 3

Monoisotopic Mass, Even Electron Ions

231 formula(e) evaluated with 1 results within limits (up to 50 closest results for each mass)

Elements Used:

C: 14-14 H: 11-26 N: 0-20 O: 0-20 Cl: 1-2

12

0521-1-15 66 (0.403)

1: TOF MS ES+  
7.39e+002

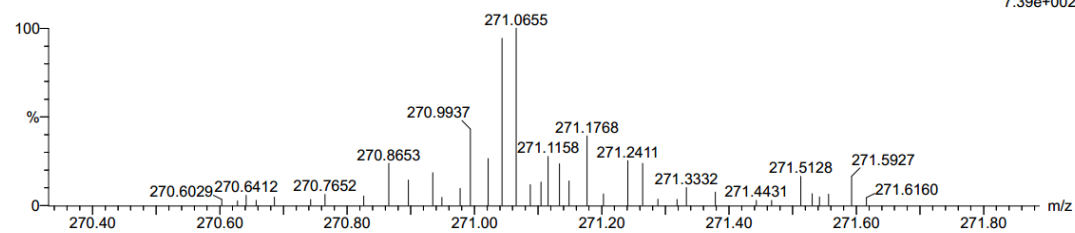

Minimum: -1.5  
Maximum: 5.0 5.0 50.0

| Mass     | Calc. Mass | mDa  | PPM  | DBE | i-FIT | Norm | Conf (%) | Formula       |
|----------|------------|------|------|-----|-------|------|----------|---------------|
| 271.0655 | 271.0656   | -0.1 | -0.4 | 5.5 | 203.0 | n/a  | n/a      | C14 H17 O Cl2 |

Figure S55. HRMS Spectra of **3c**.

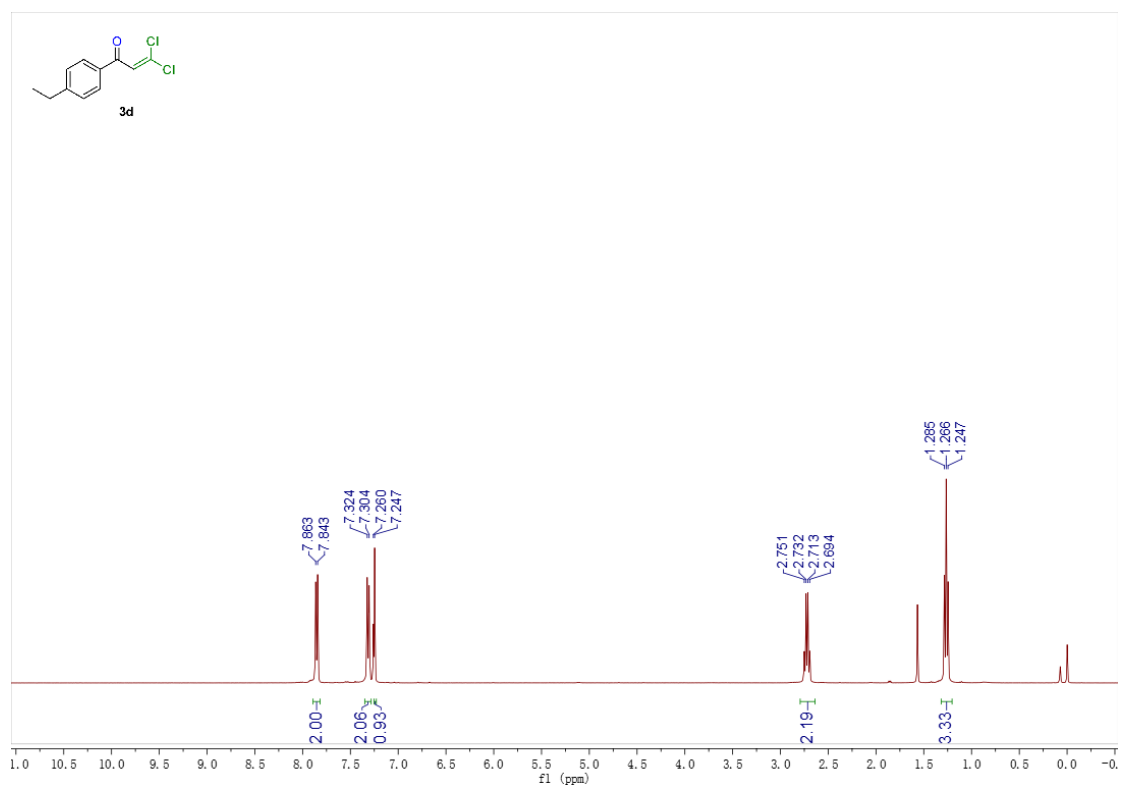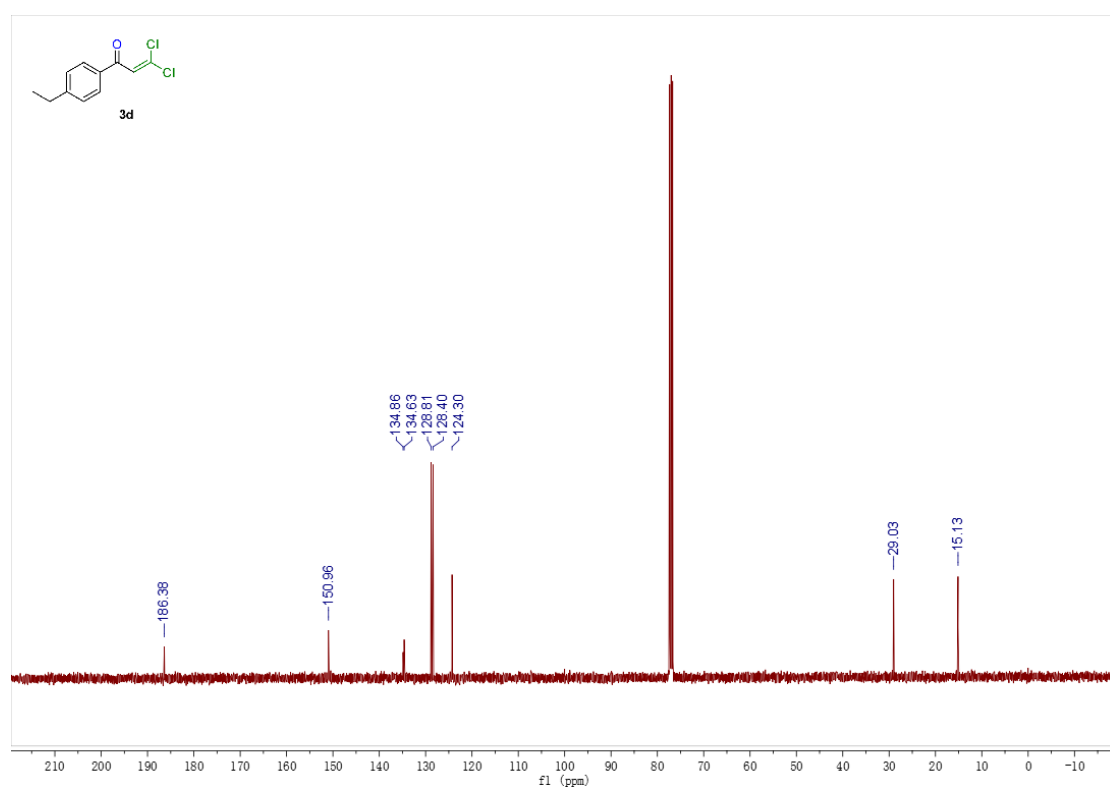

Figure S56.  $^1\text{H}$  NMR and  $^{13}\text{C}\{^1\text{H}\}$  NMR of 3d.

## Single Mass Analysis

Tolerance = 20.0 PPM / DBE: min = -1.5, max = 50.0

Element prediction: Off

Number of isotope peaks used for i-FIT = 3

Monoisotopic Mass, Even Electron Ions

202 formula(e) evaluated with 1 results within limits (up to 50 closest results for each mass)

Elements Used:

C: 11-11 H: 0-26 N: 0-20 O: 0-20 Cl: 1-3

12

0521-1-23 83 (0.501)

1: TOF MS ES+  
3.71e+005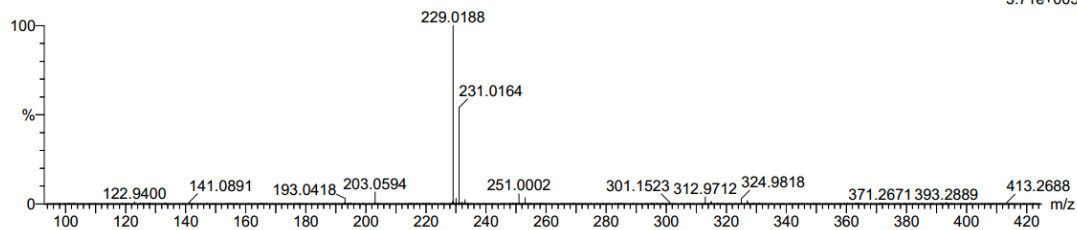Minimum: -1.5  
Maximum: 5.0 20.0 50.0

| Mass     | Calc. Mass | mDa | PPM | DBE | i-FIT  | Norm | Conf (%) | Formula       |
|----------|------------|-----|-----|-----|--------|------|----------|---------------|
| 229.0188 | 229.0187   | 0.1 | 0.4 | 5.5 | 1154.3 | n/a  | n/a      | C11 H11 O Cl2 |

Figure S57. HRMS Spectra of 3d.

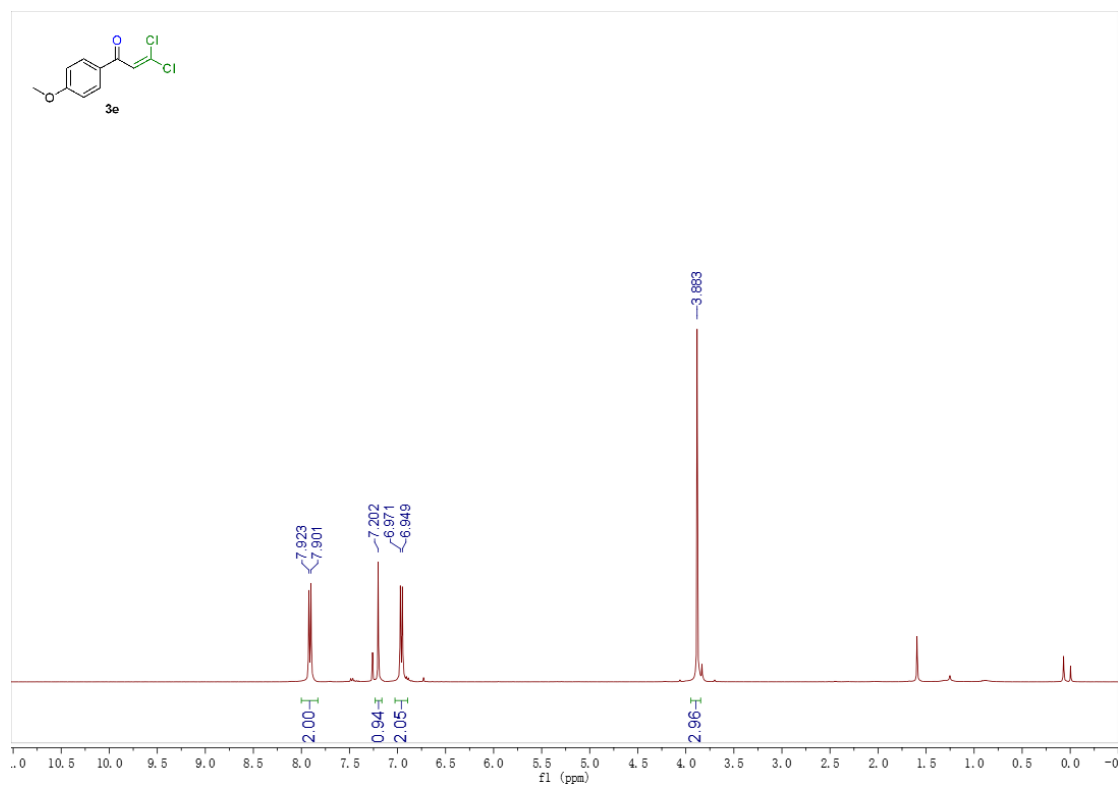



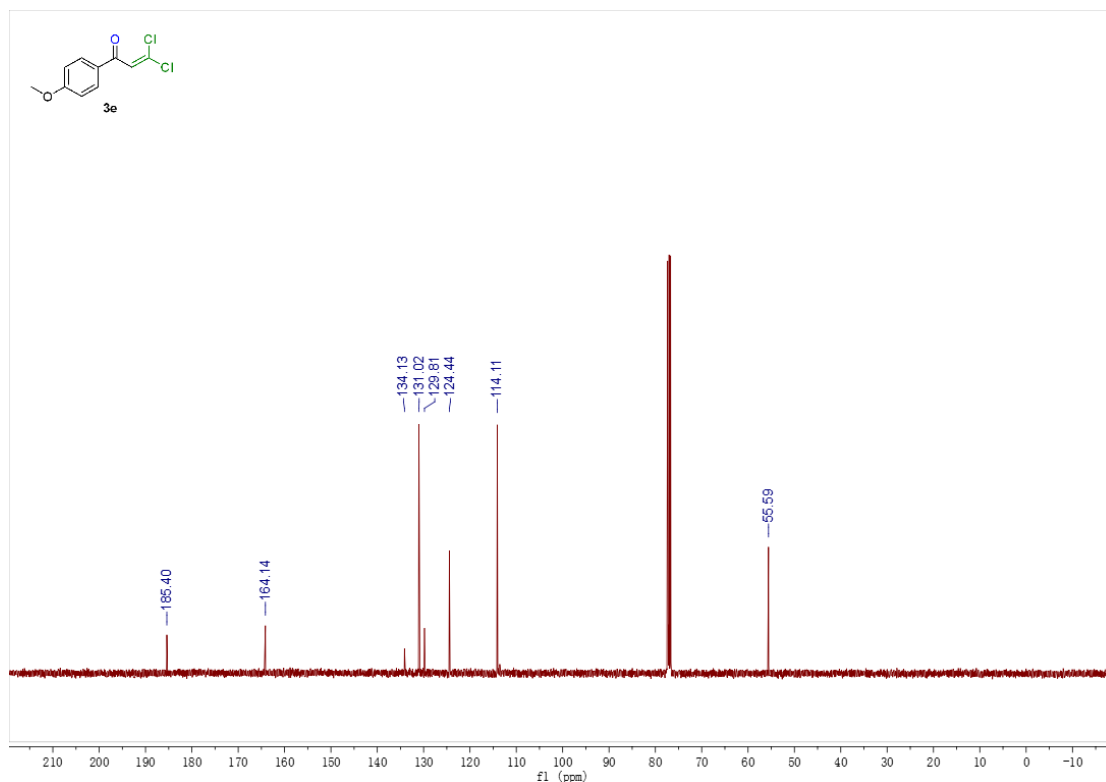

Figure S58. <sup>1</sup>H NMR and <sup>13</sup>C{<sup>1</sup>H} NMR of 3e.

Elemental Composition Report

Page 1

Single Mass Analysis

Tolerance = 20.0 PPM / DBE: min = -1.5, max = 50.0

Element prediction: Off

Number of isotope peaks used for i-FIT = 3

Monoisotopic Mass, Even Electron Ions

205 formula(e) evaluated with 1 results within limits (up to 50 closest results for each mass)

Elements Used:

C: 10-10 H: 0-26 N: 0-20 O: 0-20 Cl: 1-3

12

0521-1-22 57 (0.356)

1: TOF MS ES+  
2.79e+006

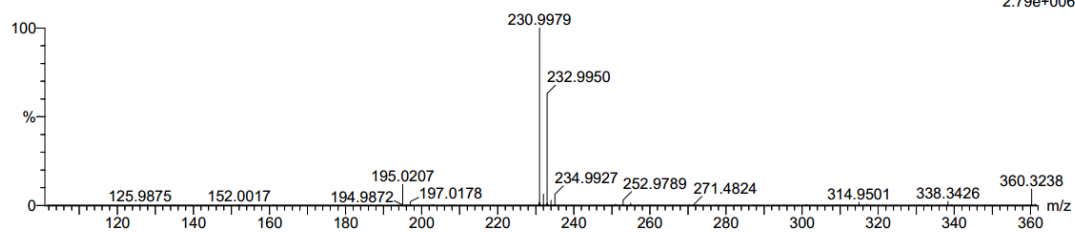

Minimum: -1.5  
Maximum: 5.0 20.0 50.0

| Mass     | Calc. Mass | mDa  | PPM  | DBE | i-FIT  | Norm | Conf (%) | Formula       |
|----------|------------|------|------|-----|--------|------|----------|---------------|
| 230.9979 | 230.9980   | -0.1 | -0.4 | 5.5 | 1500.5 | n/a  | n/a      | C10 H9 O2 Cl2 |

Figure S59. HRMS Spectra of 3e.

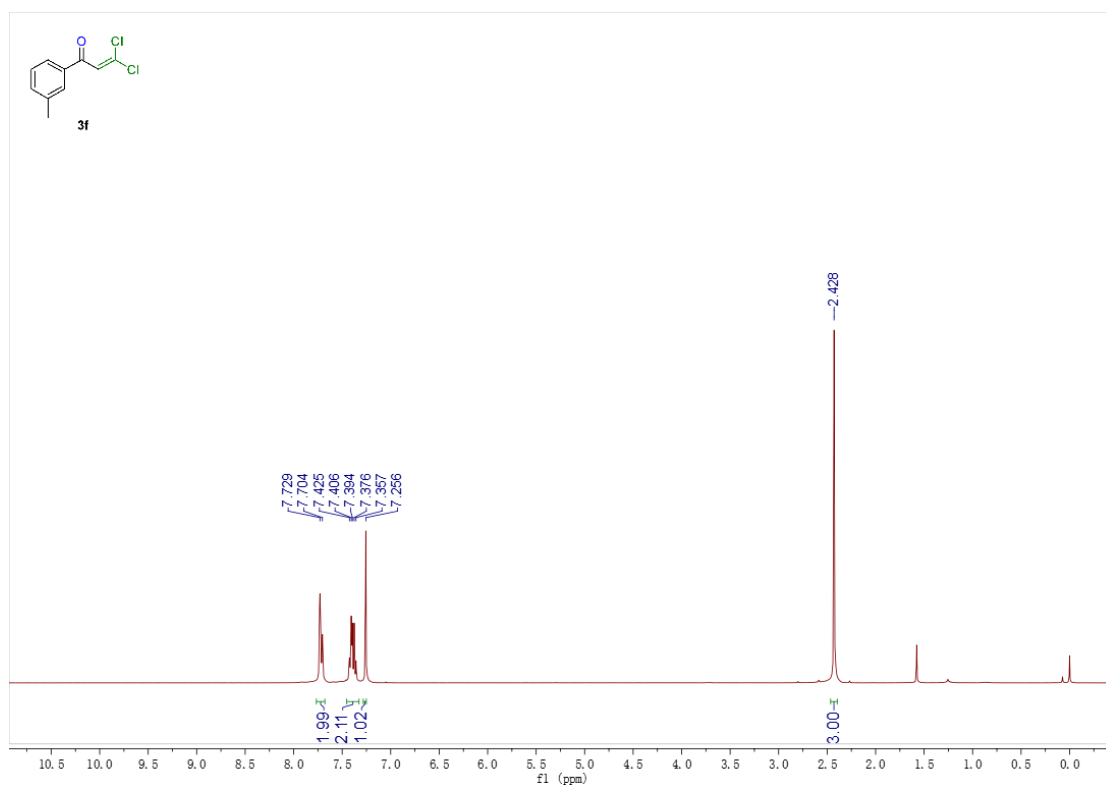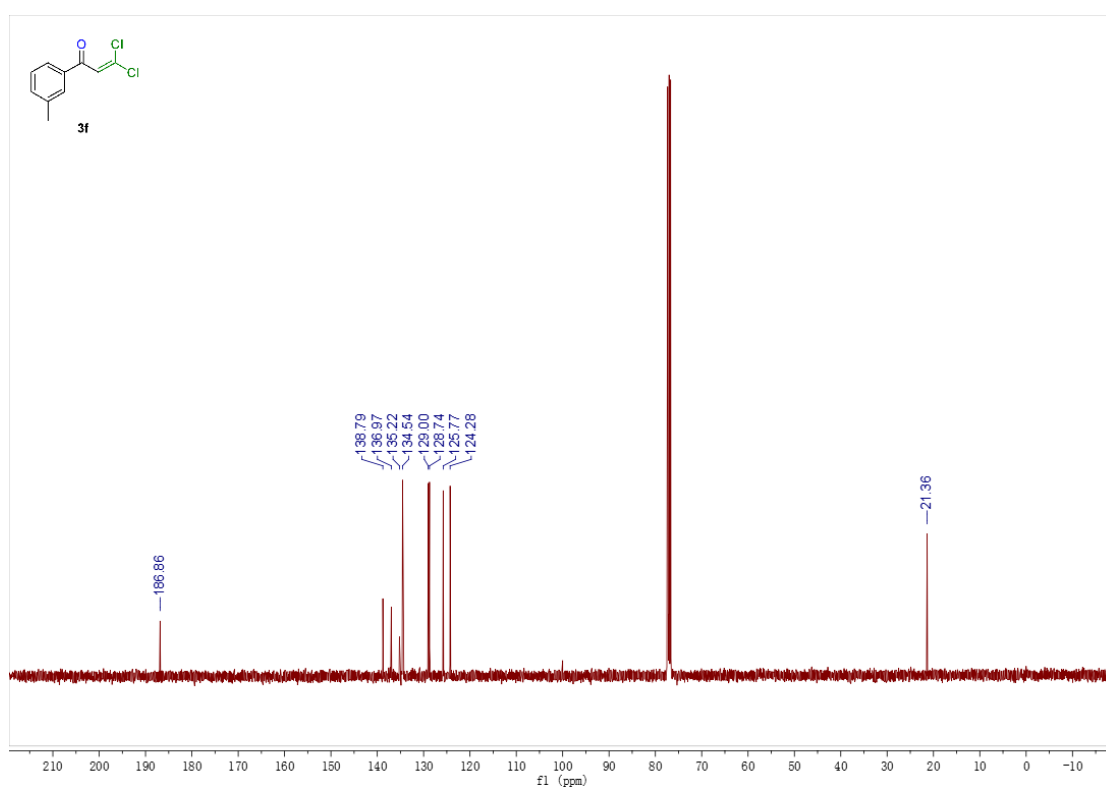

Figure S60.  $^1\text{H}$  NMR and  $^{13}\text{C}\{^1\text{H}\}$  NMR of 3f.

## Single Mass Analysis

Tolerance = 10.0 PPM / DBE: min = -1.5, max = 50.0

Element prediction: Off

Number of isotope peaks used for i-FIT = 3

Monoisotopic Mass, Even Electron Ions

143 formula(e) evaluated with 1 results within limits (all results (up to 1000) for each mass)

Elements Used:

C: 10-10 H: 0-60 N: 0-6 O: 0-20 Cl: 1-3

12

0521-1-13 70 (0.424)

1: TOF MS ES+  
2.84e+005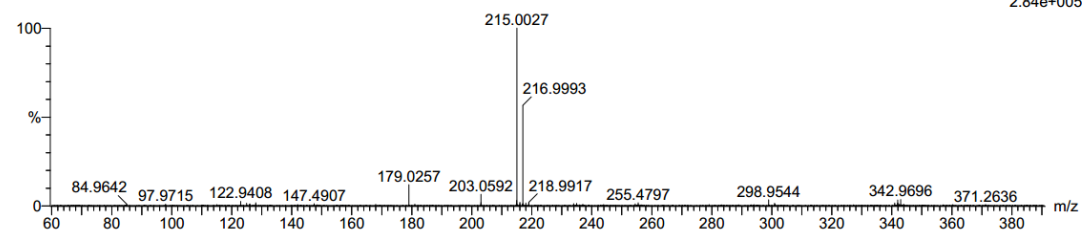Minimum: -1.5  
Maximum: 5.0 10.0 50.0

| Mass     | Calc. Mass | mDa  | PPM  | DBE | i-FIT  | Norm | Conf (%) | Formula      |
|----------|------------|------|------|-----|--------|------|----------|--------------|
| 215.0027 | 215.0030   | -0.3 | -1.4 | 5.5 | 1124.7 | n/a  | n/a      | C10 H9 O Cl2 |

Figure S61. HRMS Spectra of 3f.

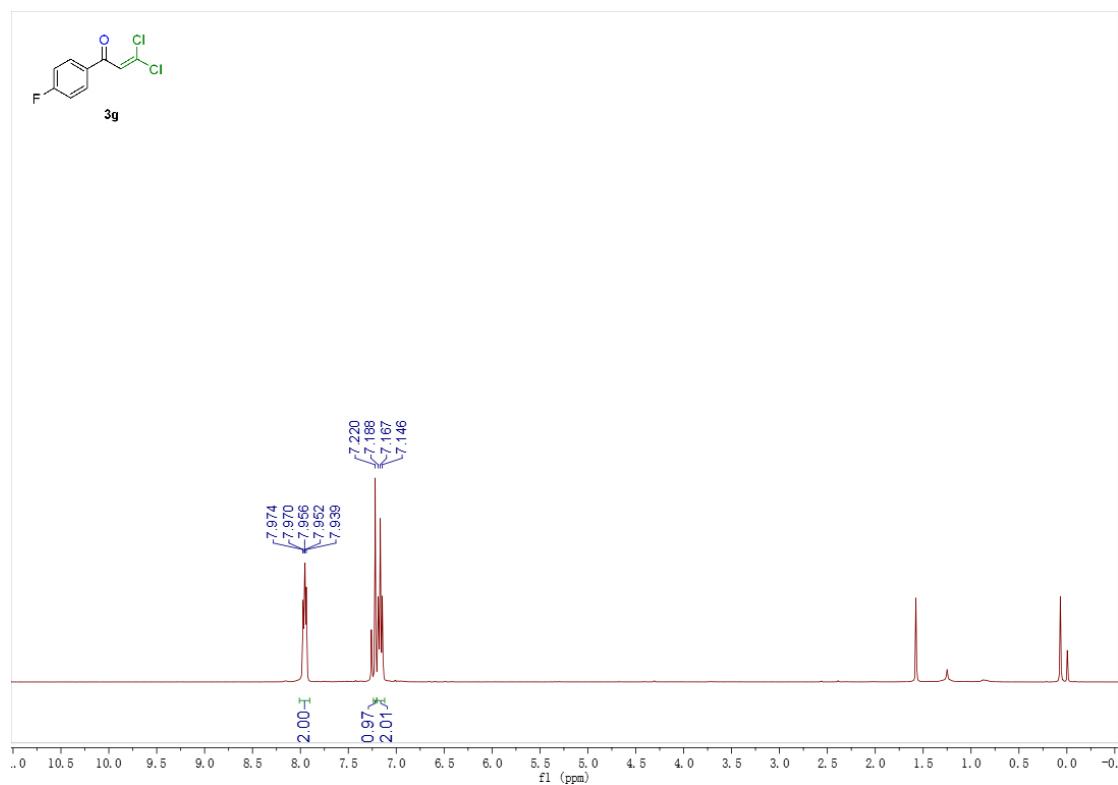

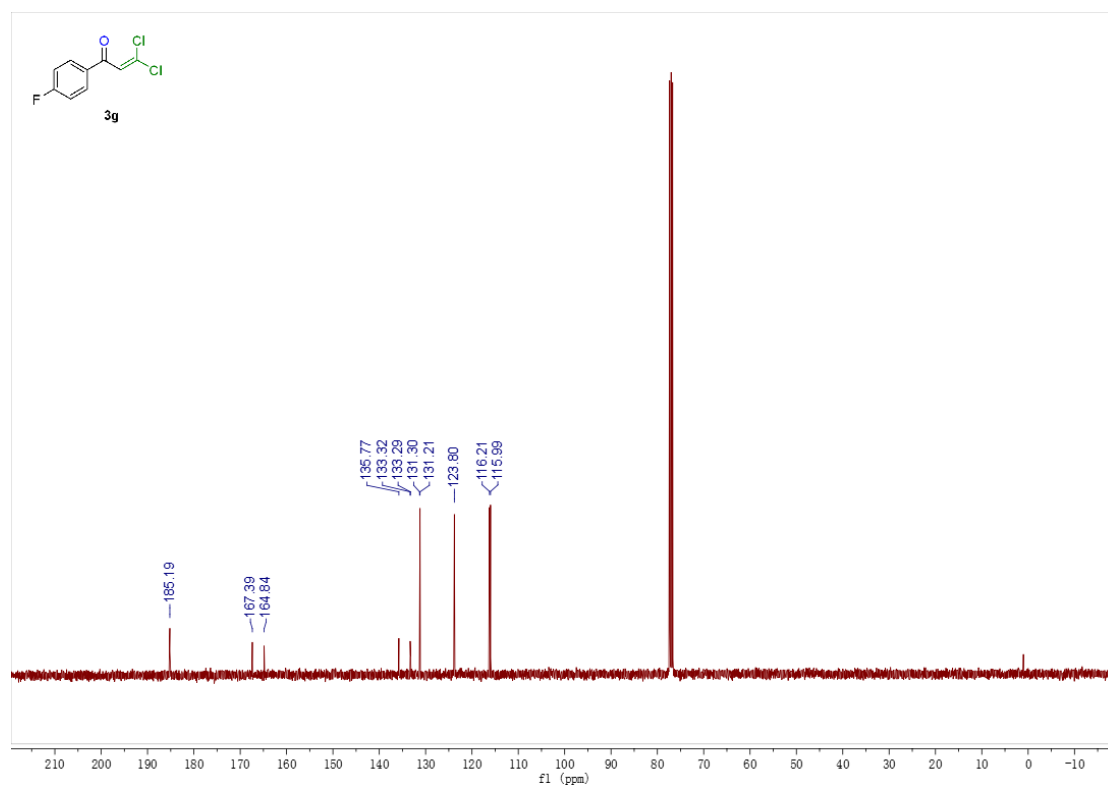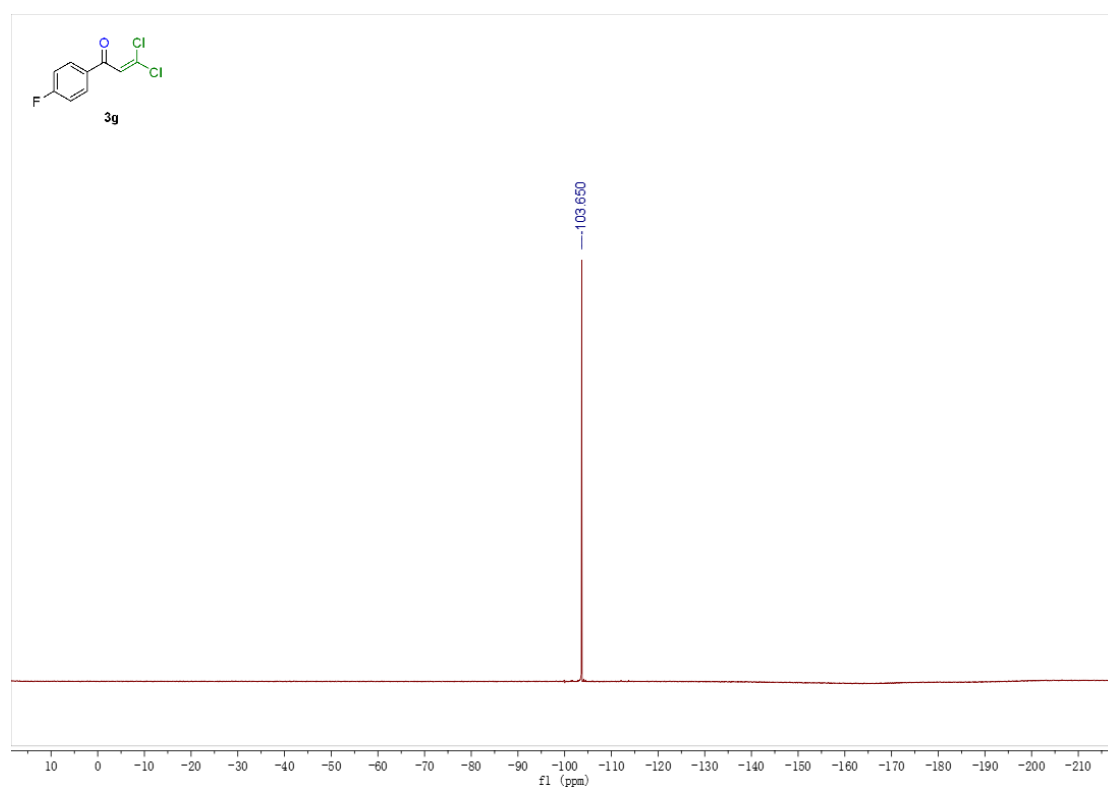

Figure S62. <sup>1</sup>H NMR and <sup>13</sup>C{<sup>1</sup>H} NMR and <sup>19</sup>F NMR of 3g.

## Single Mass Analysis

Tolerance = 20.0 PPM / DBE: min = -1.5, max = 50.0

Element prediction: Off

Number of isotope peaks used for i-FIT = 3

Monoisotopic Mass, Even Electron Ions

335 formula(e) evaluated with 1 results within limits (up to 50 closest results for each mass)

Elements Used:

C: 9-9 H: 0-26 N: 0-20 O: 0-20 Cl: 1-3 F: 1-3

12

0521-1-21 60 (0.372)

1: TOF MS ES+  
1.22e+003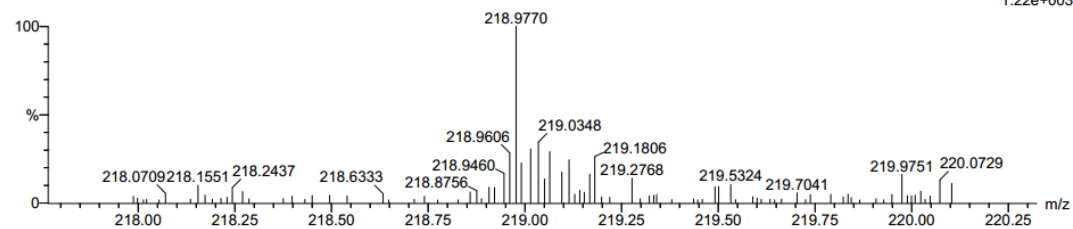Minimum: -1.5  
Maximum: 5.0 20.0 50.0

| Mass     | Calc. Mass | mDa  | PPM  | DBE | i-FIT | Norm | Conf (%) | Formula       |
|----------|------------|------|------|-----|-------|------|----------|---------------|
| 218.9770 | 218.9780   | -1.0 | -4.6 | 5.5 | 457.8 | n/a  | n/a      | C9 H6 O Cl2 F |

Figure S63. HRMS Spectra of 3g.

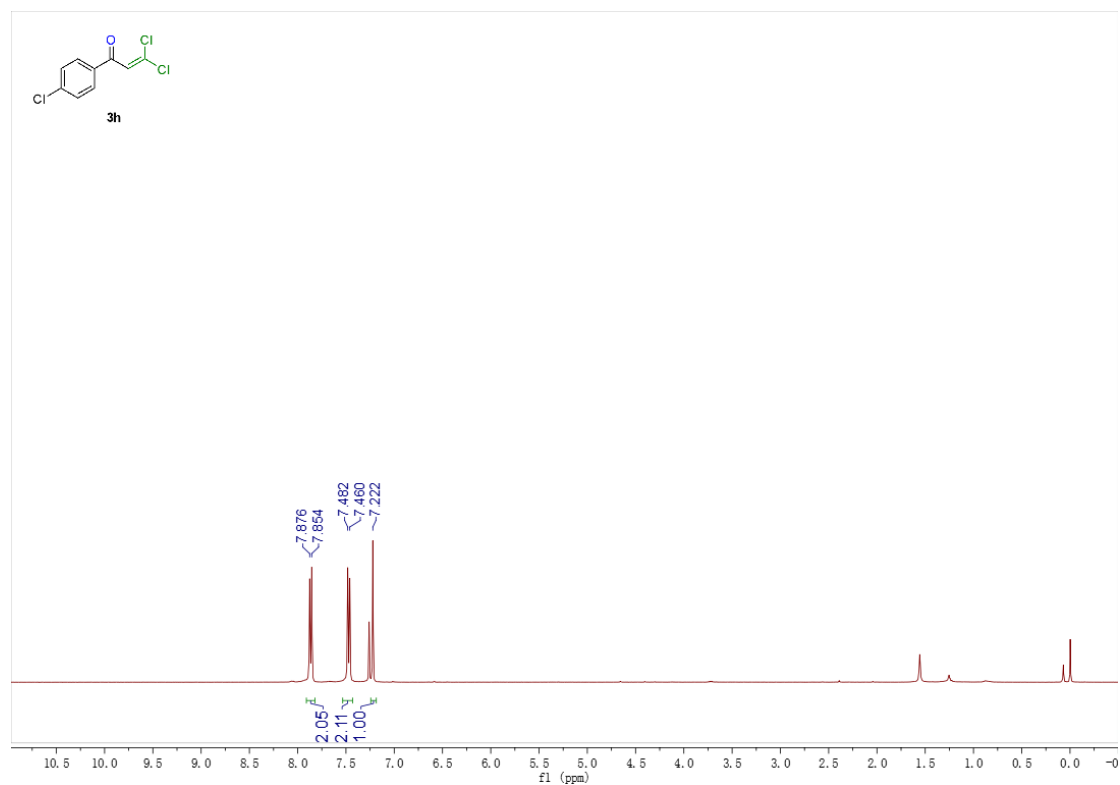

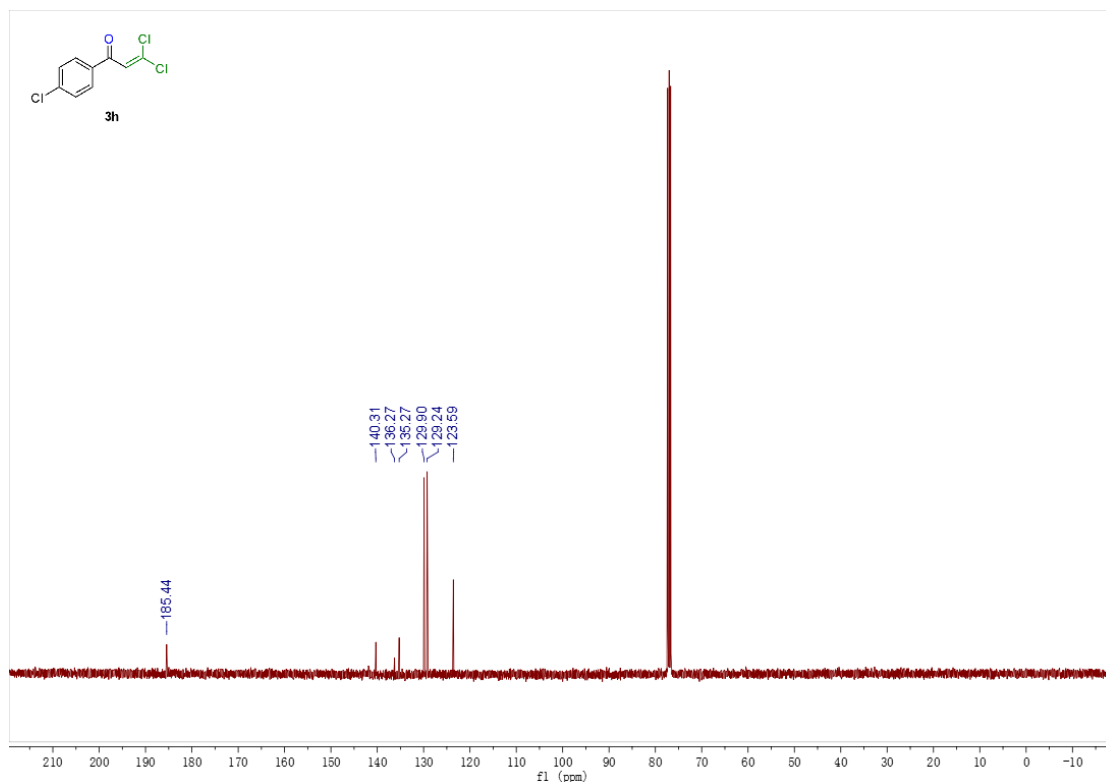

Figure S64. <sup>1</sup>H NMR and <sup>13</sup>C{<sup>1</sup>H} NMR of **3h**.

Elemental Composition Report

Page 1

Single Mass Analysis

Tolerance = 5.0 PPM / DBE: min = -1.5, max = 50.0

Element prediction: Off

Number of isotope peaks used for i-FIT = 3

Monoisotopic Mass, Even Electron Ions

214 formula(e) evaluated with 1 results within limits (up to 50 closest results for each mass)

Elements Used:

C: 9-9 H: 0-26 N: 0-20 O: 0-20 Cl: 1-3

12

0521-1-17 71 (0.438)

1: TOF MS ES+  
1.53e+003

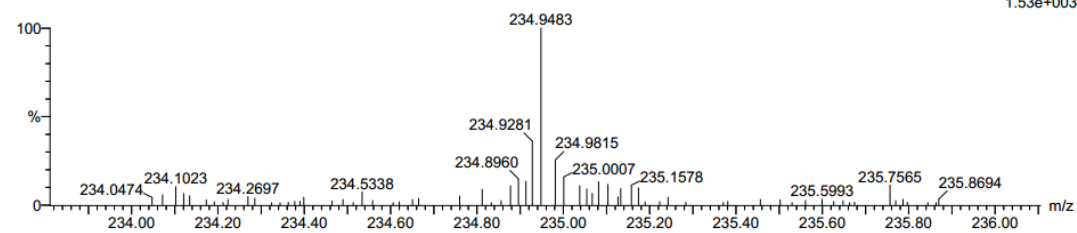

Minimum: -1.5  
Maximum: 5.0 5.0 50.0

| Mass     | Calc. Mass | mDa  | PPM  | DBE | i-FIT | Norm | Conf (%) | Formula     |
|----------|------------|------|------|-----|-------|------|----------|-------------|
| 234.9483 | 234.9484   | -0.1 | -0.4 | 5.5 | 293.6 | n/a  | n/a      | C9 H6 O Cl3 |

Figure S65. HRMS Spectra of **3h**.

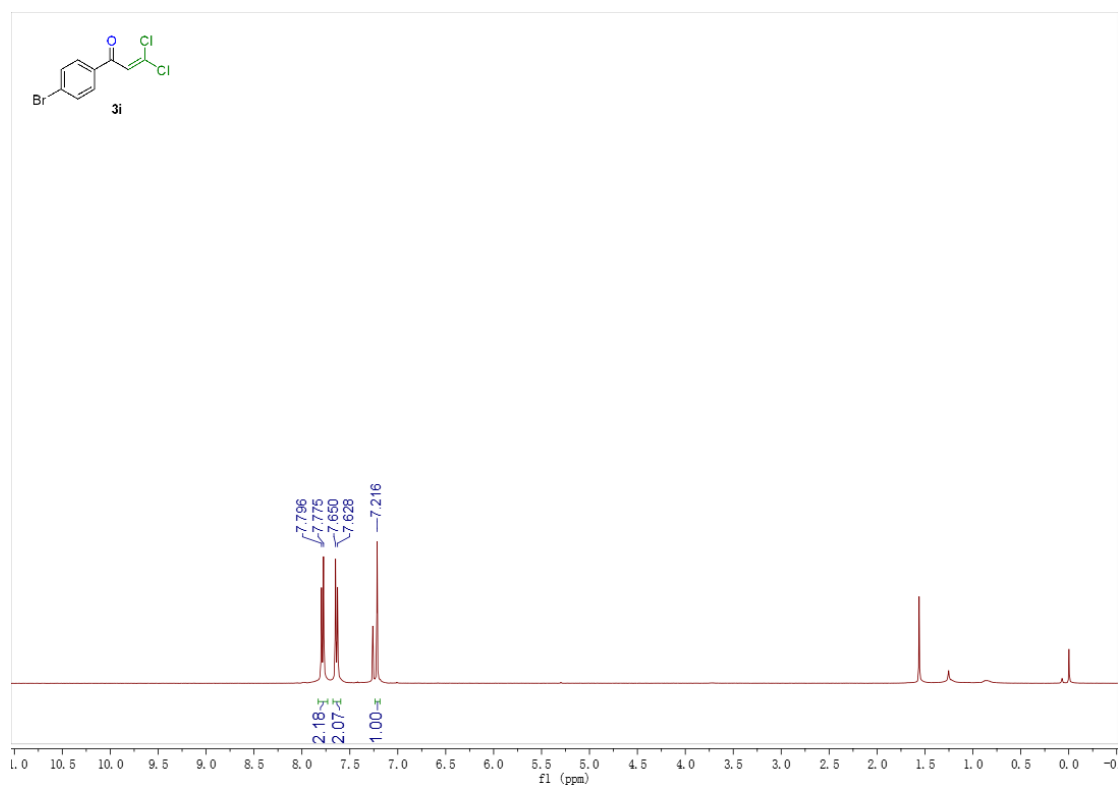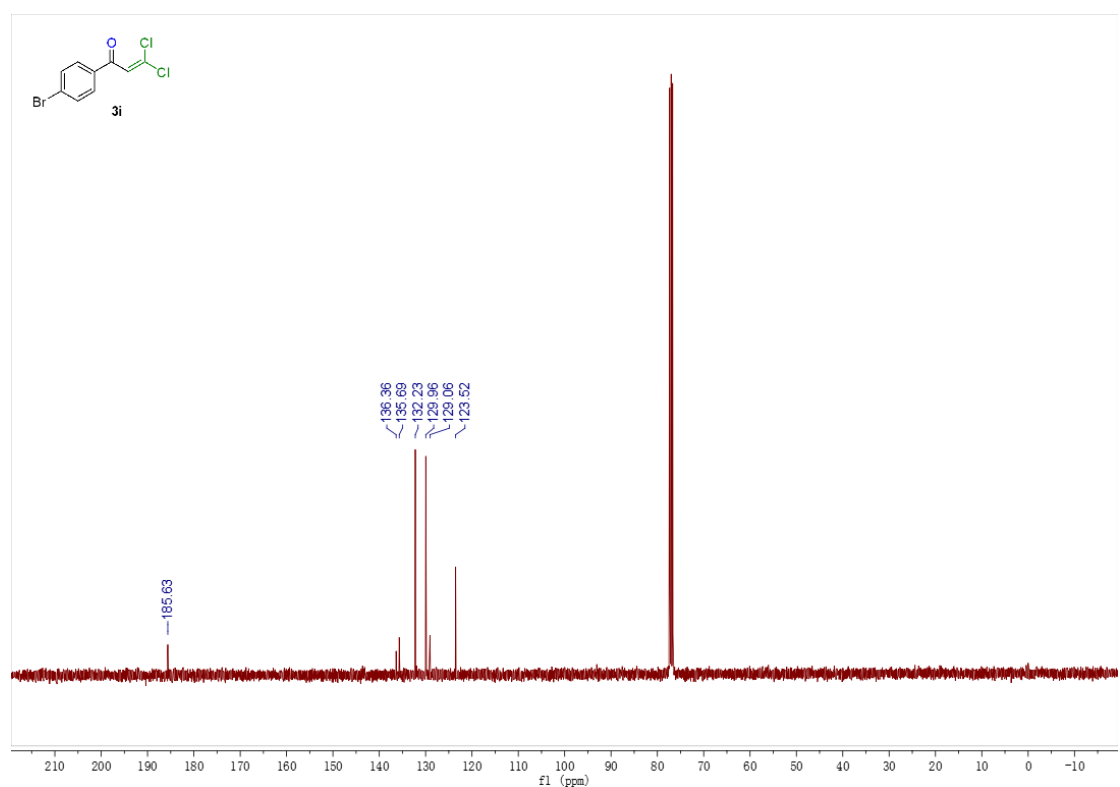

**Figure S66.** <sup>1</sup>H NMR and <sup>13</sup>C{<sup>1</sup>H} NMR of **3i**.

## Single Mass Analysis

Tolerance = 10.0 PPM / DBE: min = -1.5, max = 50.0

Element prediction: Off

Number of isotope peaks used for i-FIT = 3

Monoisotopic Mass, Even Electron Ions

179 formula(e) evaluated with 1 results within limits (up to 50 closest results for each mass)

Elements Used:

C: 9-9 H: 0-26 N: 0-20 O: 0-20 Cl: 1-3 Br: 1-3

12

0521-1-19 77 (0.469)

1: TOF MS ES+  
3.96e+003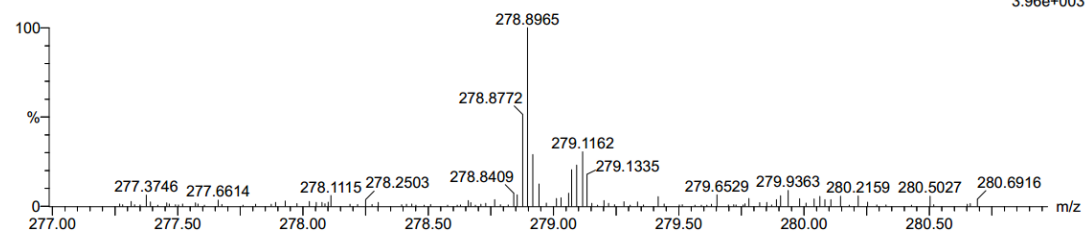Minimum: -1.5  
Maximum: 5.0 10.0 50.0

| Mass     | Calc. Mass | mDa  | PPM  | DBE | i-FIT | Norm | Conf (%) | Formula        |
|----------|------------|------|------|-----|-------|------|----------|----------------|
| 278.8965 | 278.8979   | -1.4 | -5.0 | 5.5 | 540.8 | n/a  | n/a      | C9 H6 O Cl2 Br |

Figure S67. HRMS Spectra of **3i**.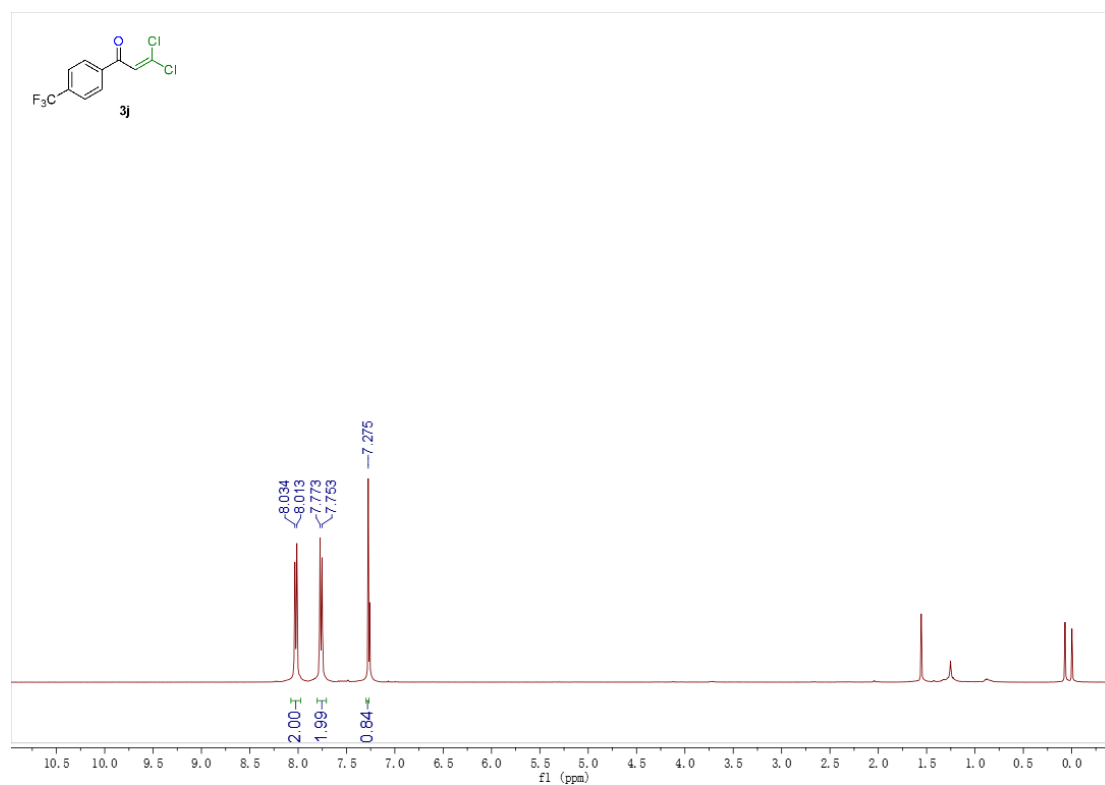



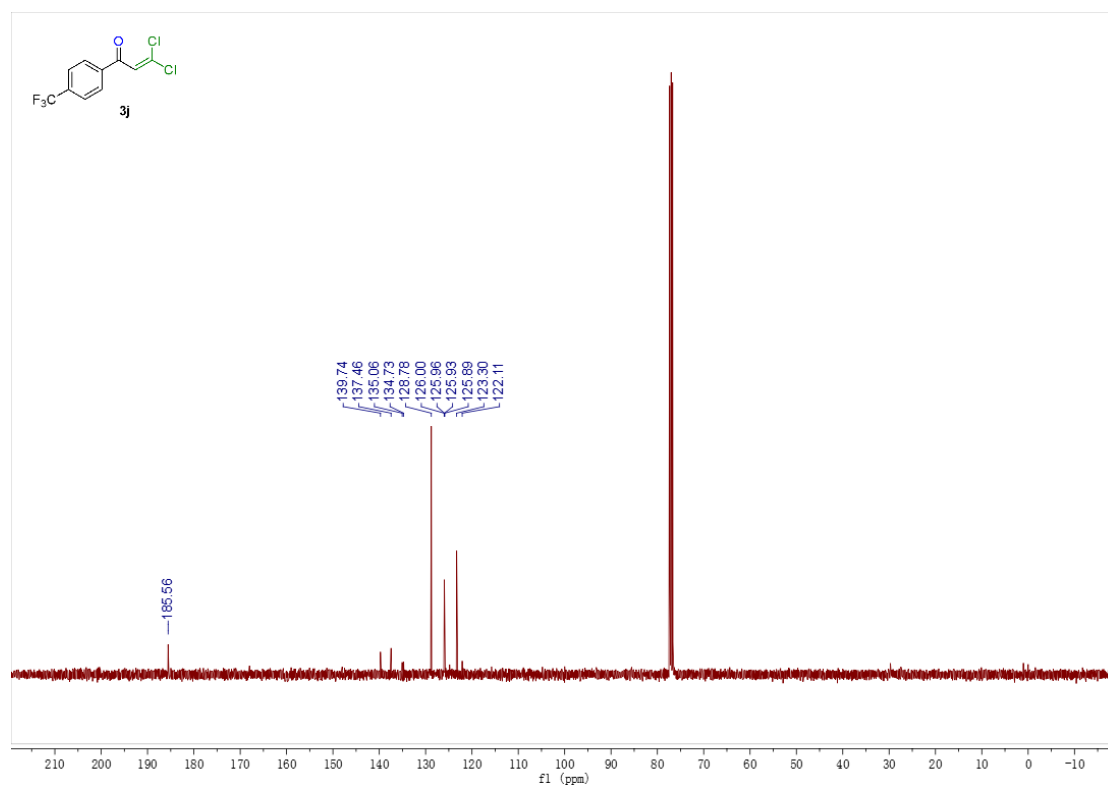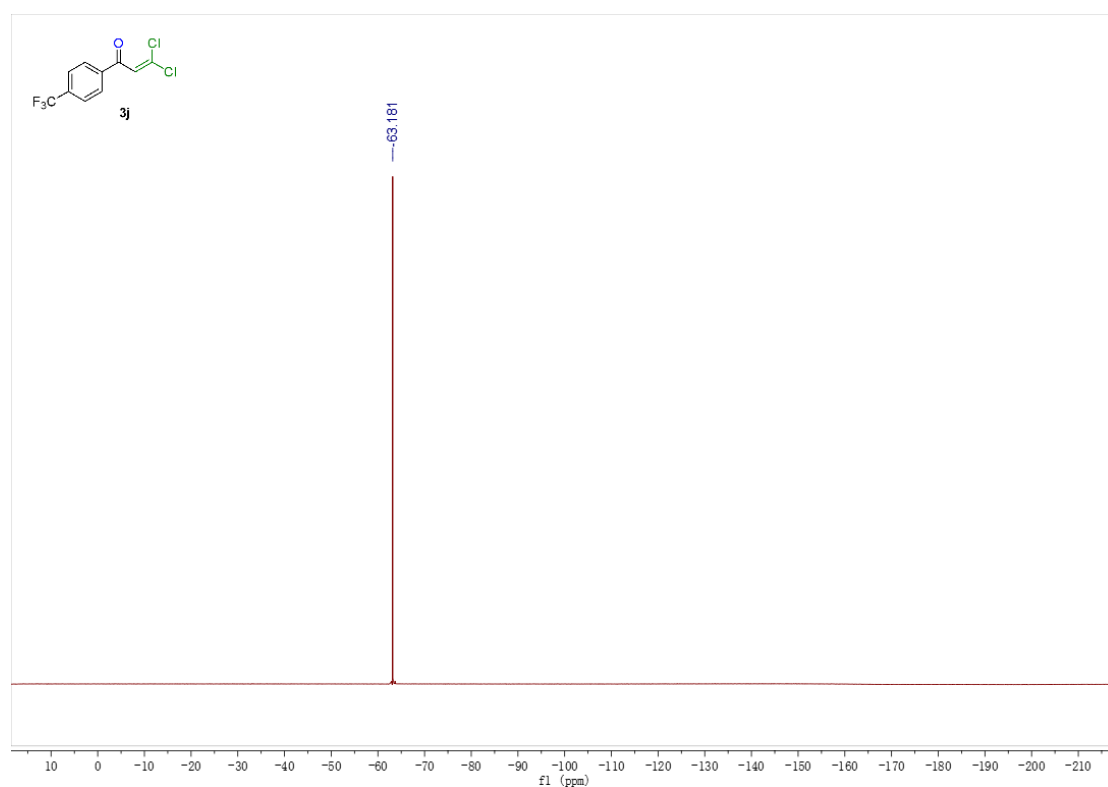

**Figure S68.**  $^1\text{H}$  NMR and  $^{13}\text{C}\{^1\text{H}\}$  NMR and  $^{19}\text{F}$  NMR of **3j**.

## Single Mass Analysis

Tolerance = 5.0 PPM / DBE: min = -1.5, max = 50.0

Element prediction: Off

Number of isotope peaks used for i-FIT = 3

Monoisotopic Mass, Even Electron Ions

296 formula(e) evaluated with 1 results within limits (up to 50 closest results for each mass)

Elements Used:

C: 10-10 H: 0-26 N: 0-20 O: 0-20 Cl: 1-2 F: 2-3

12

0521-1-16 87 (0.530)

1: TOF MS ES+  
4.11e+002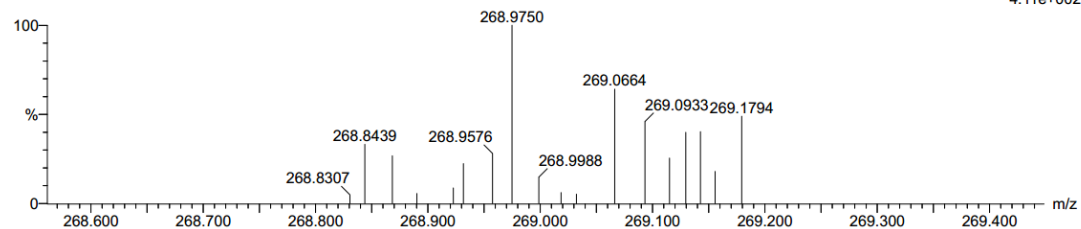Minimum: -1.5  
Maximum: 5.0 5.0 50.0

| Mass     | Calc. Mass | mDa | PPM | DBE | i-FIT | Norm | Conf (%) | Formula         |
|----------|------------|-----|-----|-----|-------|------|----------|-----------------|
| 268.9750 | 268.9748   | 0.2 | 0.7 | 5.5 | 113.9 | n/a  | n/a      | C10 H6 O Cl2 F3 |

Figure S69. HRMS Spectra of 3j.

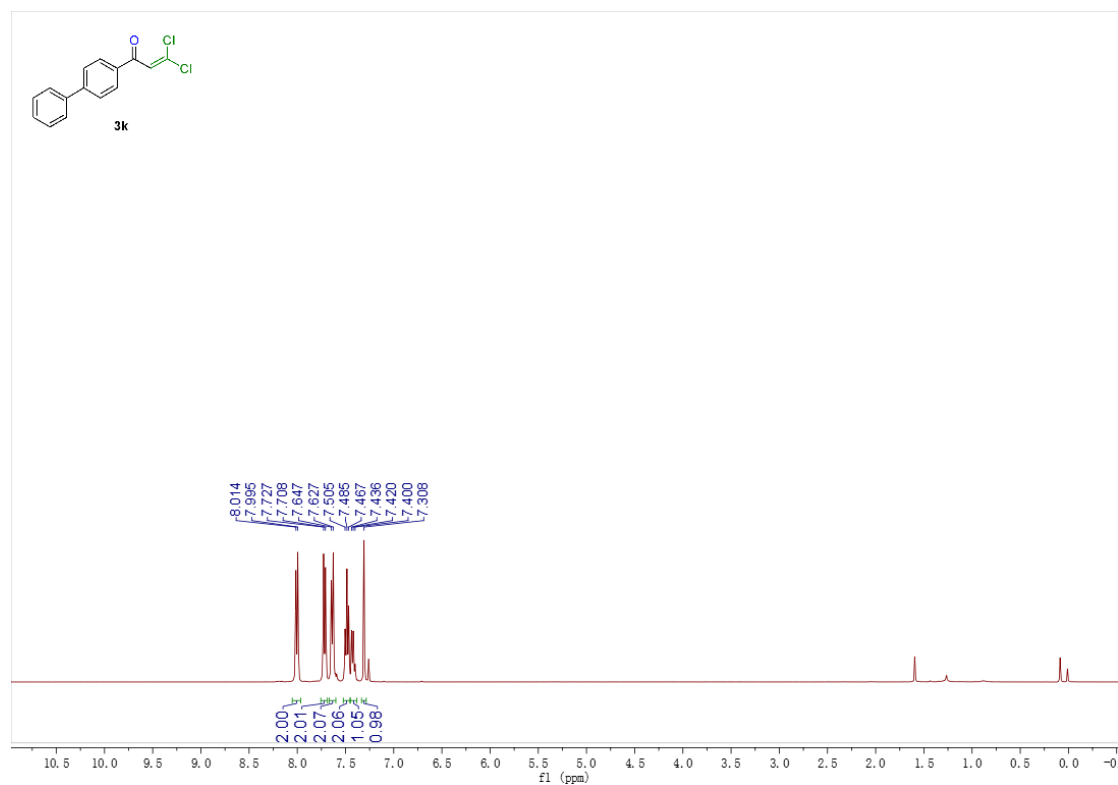

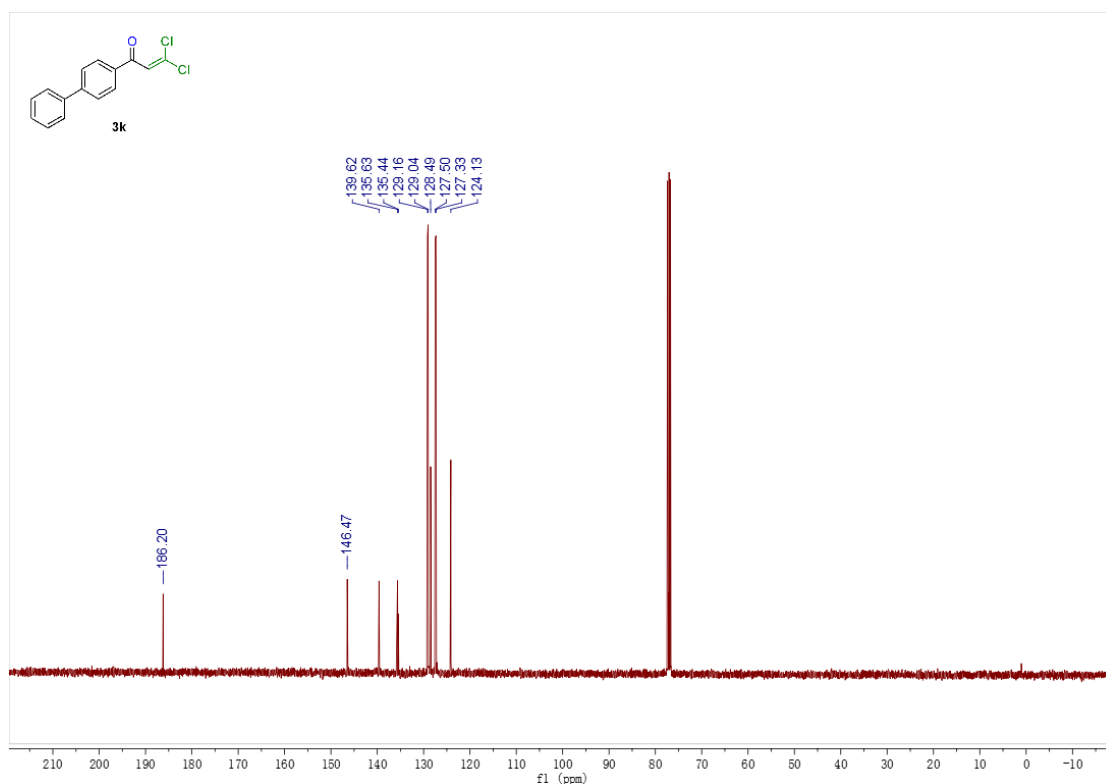

Figure S70. <sup>1</sup>H NMR and <sup>13</sup>C{<sup>1</sup>H} NMR of 3k.

Elemental Composition Report

Page 1

Single Mass Analysis

Tolerance = 20.0 PPM / DBE: min = -1.5, max = 50.0

Element prediction: Off

Number of isotope peaks used for i-FIT = 3

Monoisotopic Mass, Even Electron Ions

331 formula(e) evaluated with 1 results within limits (up to 50 closest results for each mass)

Elements Used:

C: 15-15 H: 0-26 N: 0-20 O: 0-20 Cl: 1-3

12

0521-1-26 107 (0.643)

1: TOF MS ES+  
7.76e+004

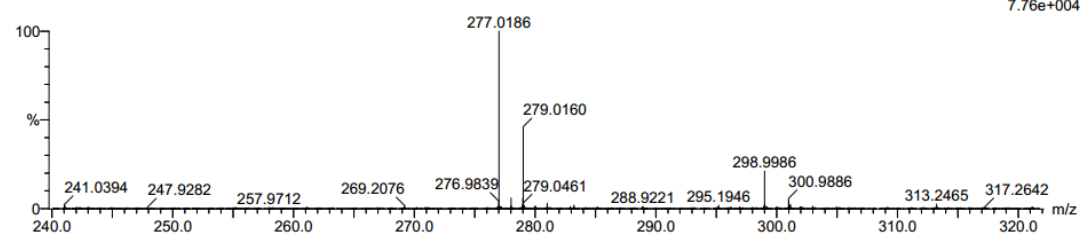

Minimum: -1.5  
Maximum: 5.0 20.0 50.0

| Mass     | Calc. Mass | mDa  | PPM  | DBE | i-FIT | Norm | Conf (%) | Formula       |
|----------|------------|------|------|-----|-------|------|----------|---------------|
| 277.0186 | 277.0187   | -0.1 | -0.4 | 9.5 | 936.9 | n/a  | n/a      | C15 H11 O Cl2 |

Figure S71. HRMS Spectra of 3k.

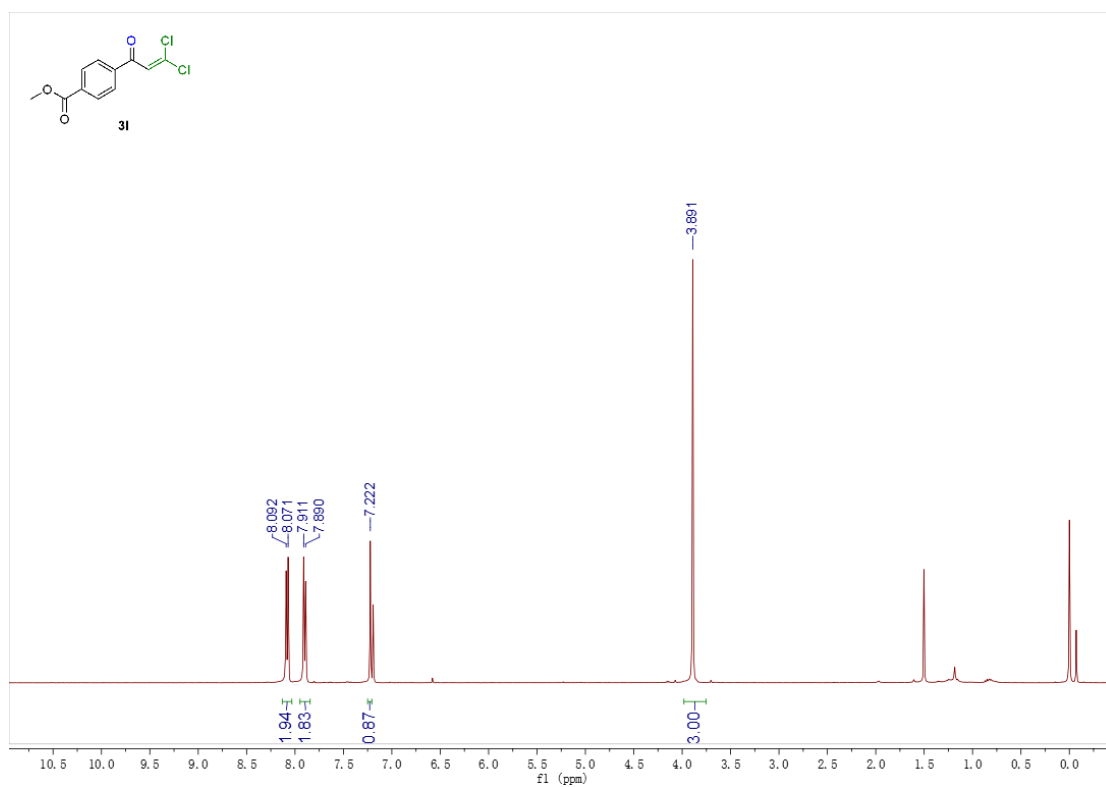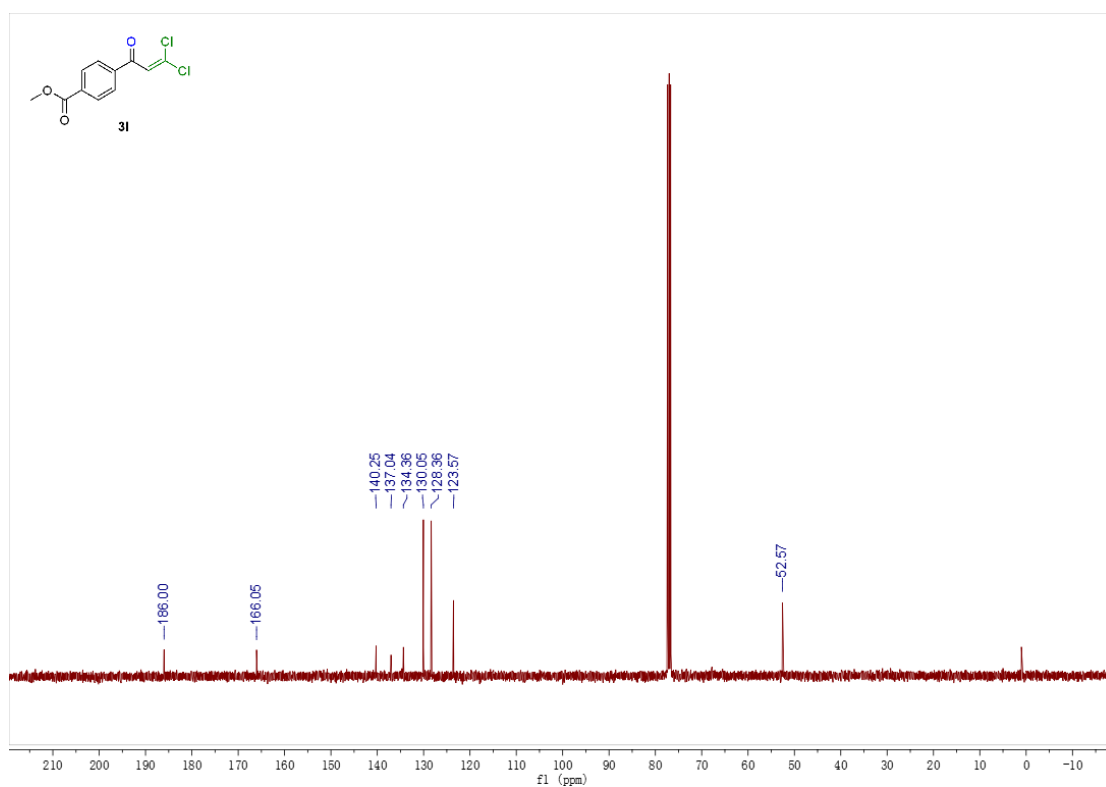

Figure S72. <sup>1</sup>H NMR and <sup>13</sup>C{<sup>1</sup>H} NMR of 31.

## Single Mass Analysis

Tolerance = 5.0 PPM / DBE: min = -1.5, max = 50.0

Element prediction: Off

Number of isotope peaks used for i-FIT = 3

Monoisotopic Mass, Even Electron Ions

272 formula(e) evaluated with 1 results within limits (up to 50 closest results for each mass)

Elements Used:

C: 11-11 H: 0-26 N: 0-20 O: 0-20 Cl: 1-3

12

0521-1-18 82 (0.495)

1: TOF MS ES+  
6.81e+002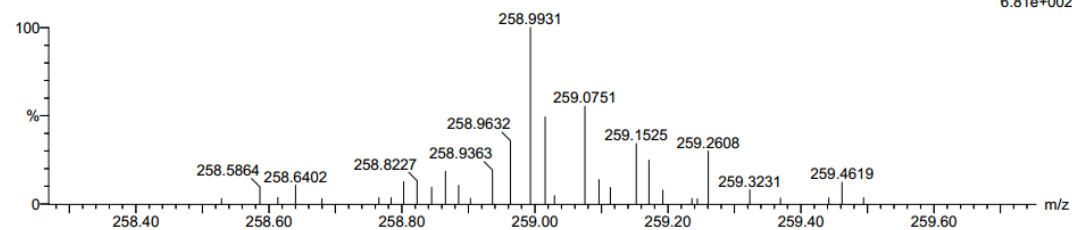Minimum: 5.0 5.0 -1.5  
Maximum: 5.0 5.0 50.0

| Mass     | Calc. Mass | mDa | PPM | DBE | i-FIT | Norm | Conf (%) | Formula       |
|----------|------------|-----|-----|-----|-------|------|----------|---------------|
| 258.9931 | 258.9929   | 0.2 | 0.8 | 6.5 | 159.2 | n/a  | n/a      | C11 H9 O3 Cl2 |

Figure S73. HRMS Spectra of 3l.

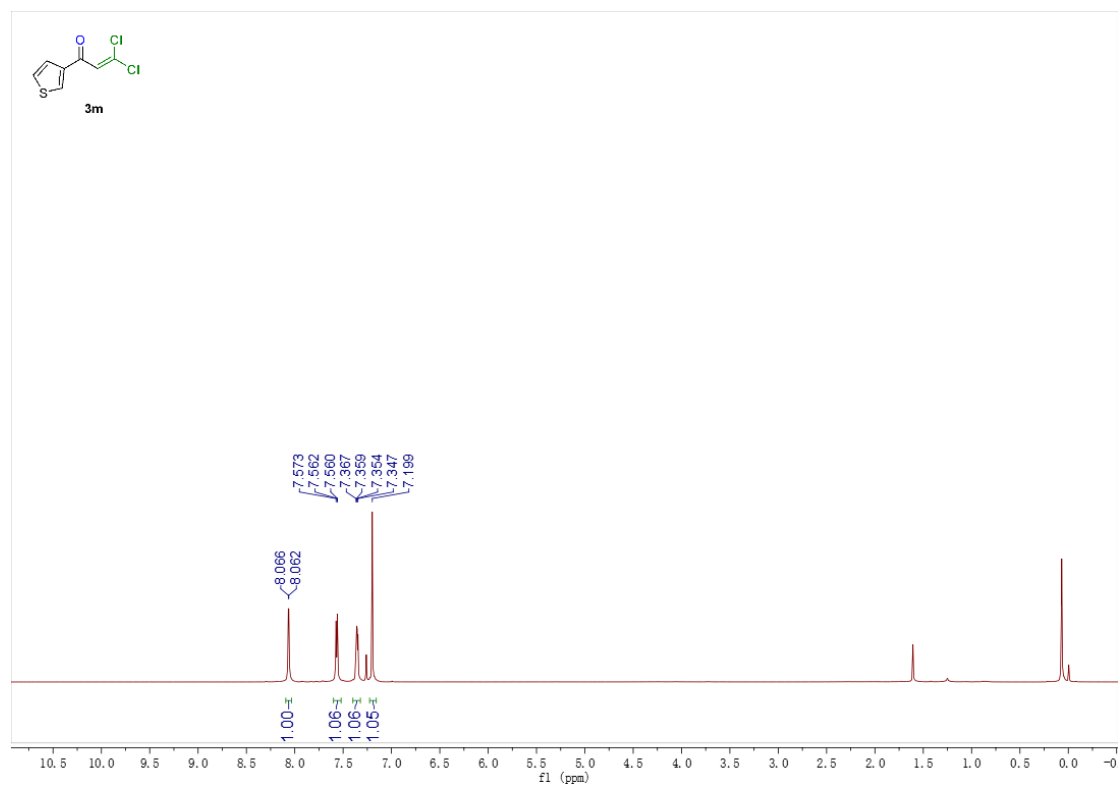

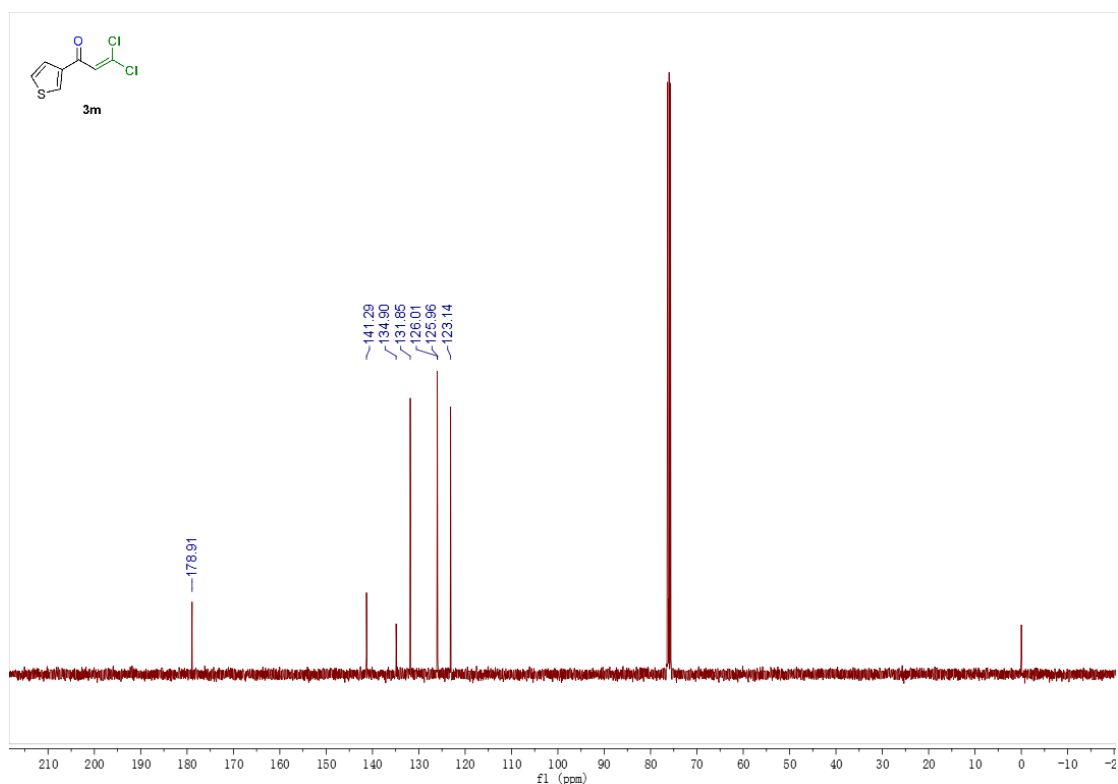

Figure S74. <sup>1</sup>H NMR and <sup>13</sup>C{<sup>1</sup>H} NMR of **3m**.

### Elemental Composition Report

Page 1

#### Single Mass Analysis

Tolerance = 10.0 PPM / DBE: min = -1.5, max = 50.0

Element prediction: Off

Number of isotope peaks used for i-FIT = 3

Monoisotopic Mass, Even Electron Ions

153 formula(e) evaluated with 1 results within limits (up to 50 closest results for each mass)

Elements Used:

C: 7-7 H: 0-26 N: 0-20 O: 0-20 S: 1-2 Cl: 1-3

12

0521-1-20 57 (0.356)

1: TOF MS ES+  
4.33e+004

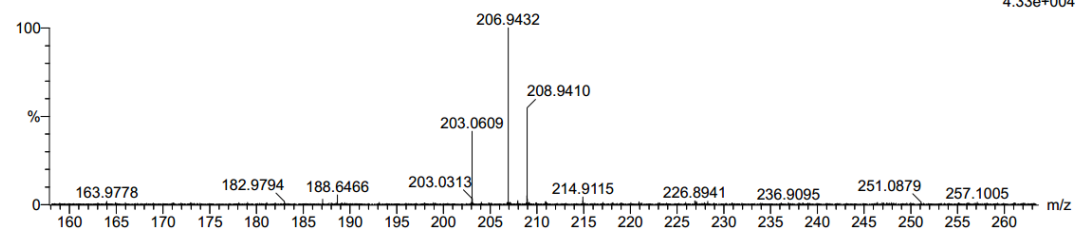

Minimum: -1.5  
Maximum: 5.0 10.0 50.0

| Mass     | Calc. Mass | mDa  | PPM  | DBE | i-FIT  | Norm | Conf (%) | Formula       |
|----------|------------|------|------|-----|--------|------|----------|---------------|
| 206.9432 | 206.9438   | -0.6 | -2.9 | 4.5 | 1101.6 | n/a  | n/a      | C7 H5 O S Cl2 |

Figure S75. HRMS Spectra of **3m**.

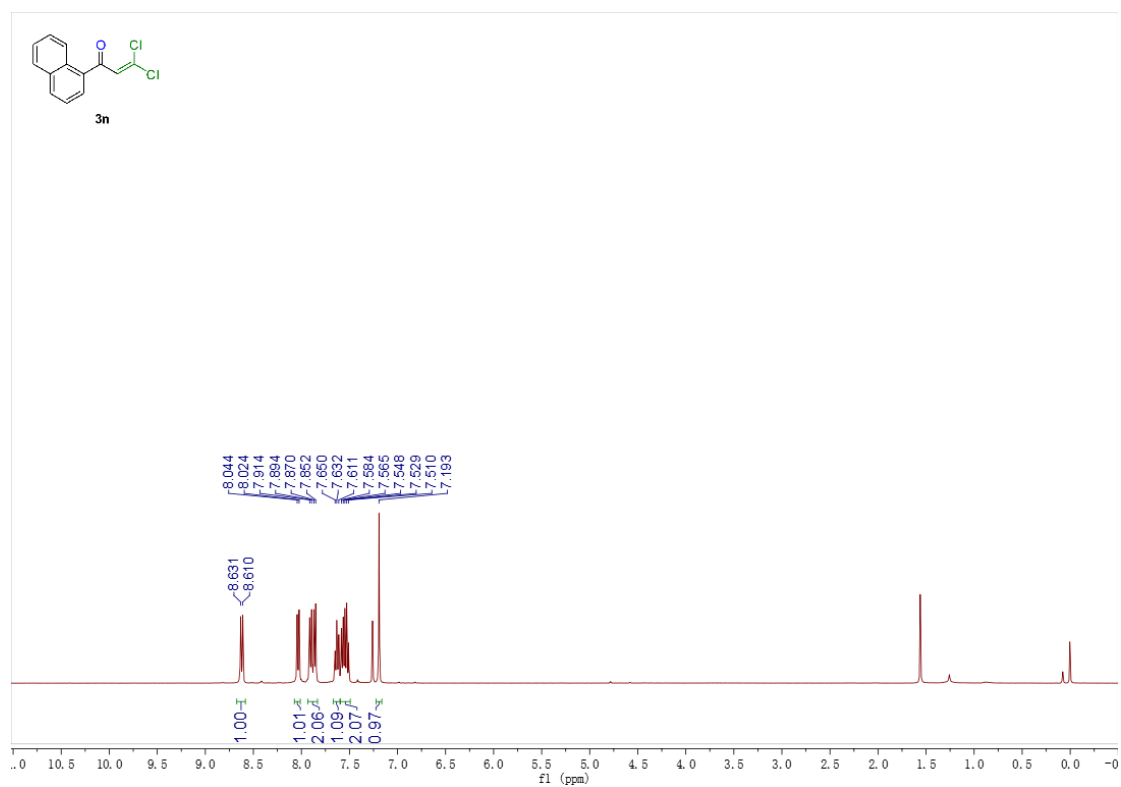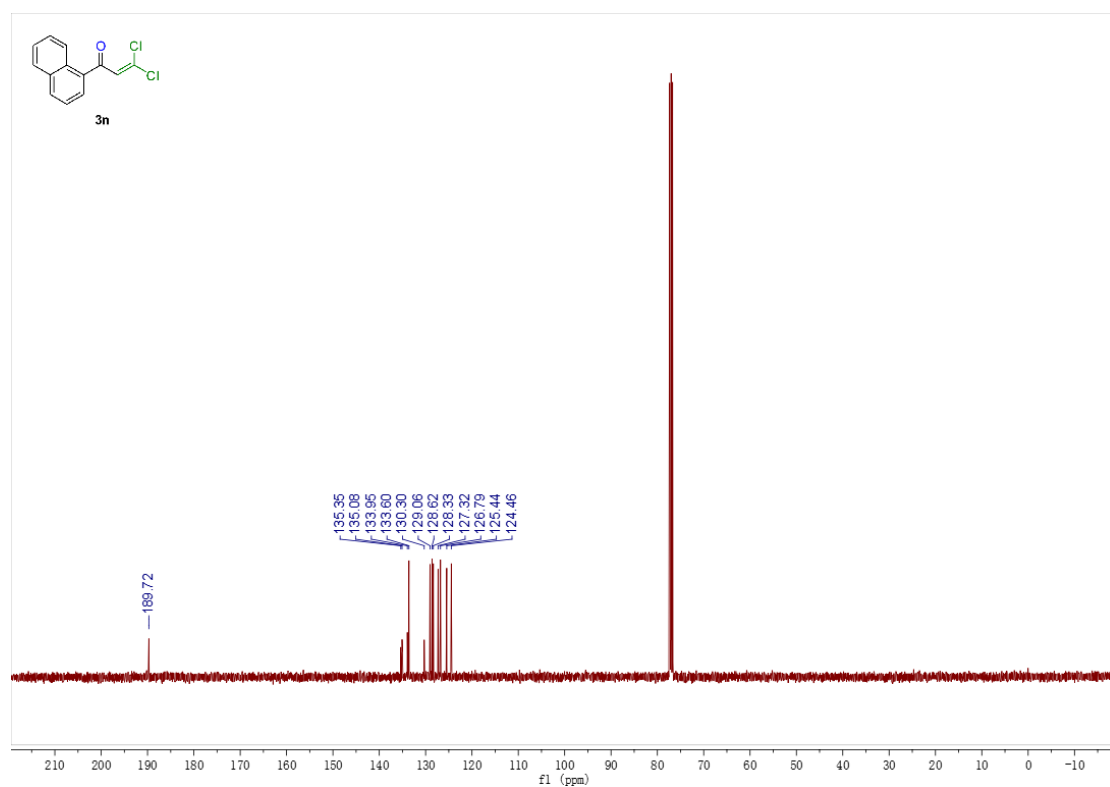

**Figure S76.** <sup>1</sup>H NMR and <sup>13</sup>C{<sup>1</sup>H} NMR of **3n**.

## Single Mass Analysis

Tolerance = 20.0 PPM / DBE: min = -1.5, max = 50.0

Element prediction: Off

Number of isotope peaks used for i-FIT = 3

Monoisotopic Mass, Even Electron Ions

257 formula(e) evaluated with 1 results within limits (up to 50 closest results for each mass)

Elements Used:

C: 13-13 H: 0-26 N: 0-20 O: 0-20 Cl: 1-3

12

0521-1-24 87 (0.530)

1: TOF MS ES+  
9.82e+004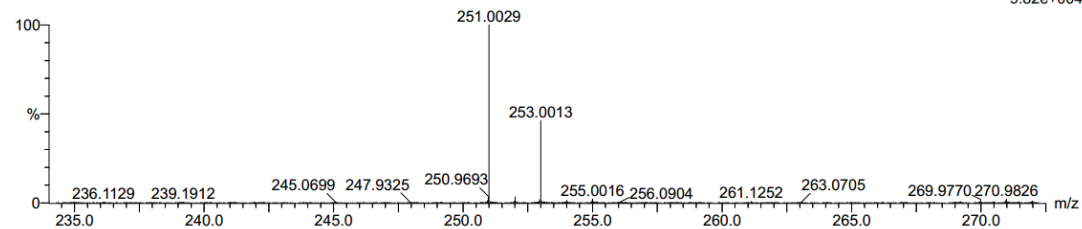

Minimum: -1.5  
Maximum: 5.0 20.0 50.0

| Mass     | Calc. Mass | mDa  | PPM  | DBE | i-FIT | Norm | Conf (%) | Formula      |
|----------|------------|------|------|-----|-------|------|----------|--------------|
| 251.0029 | 251.0030   | -0.1 | -0.4 | 8.5 | 958.5 | n/a  | n/a      | C13 H9 O Cl2 |

Figure S77. HRMS Spectra of 3n.

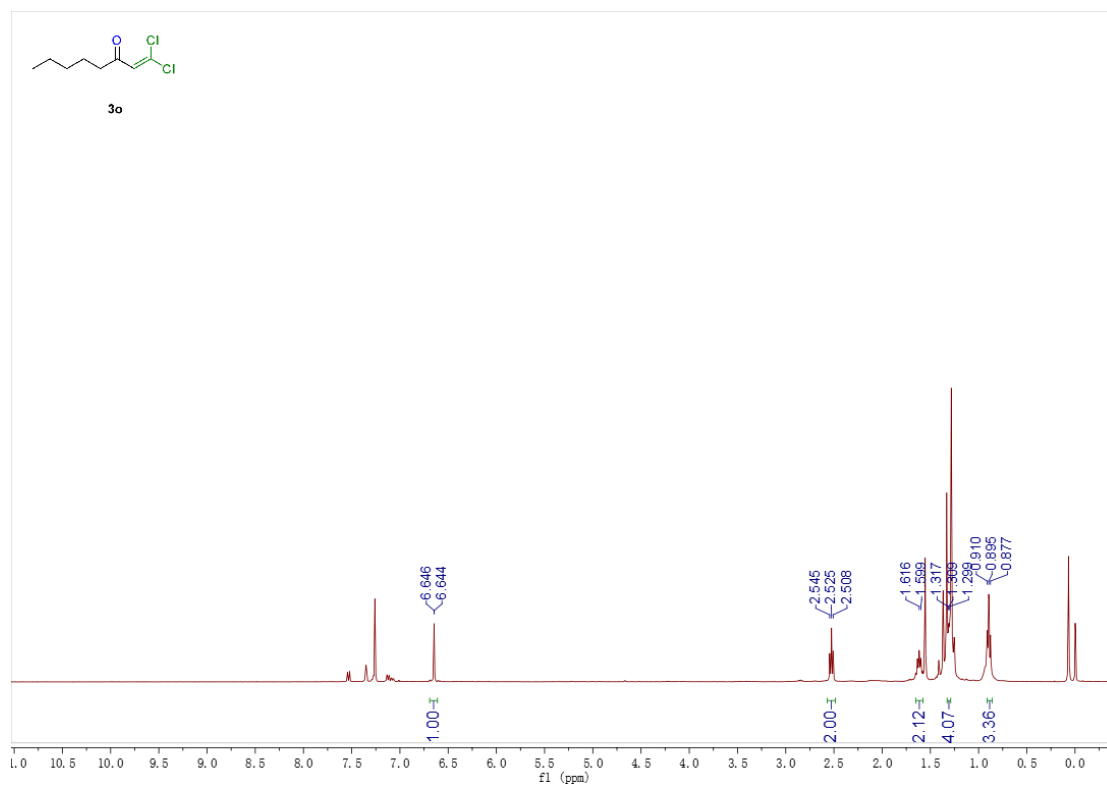



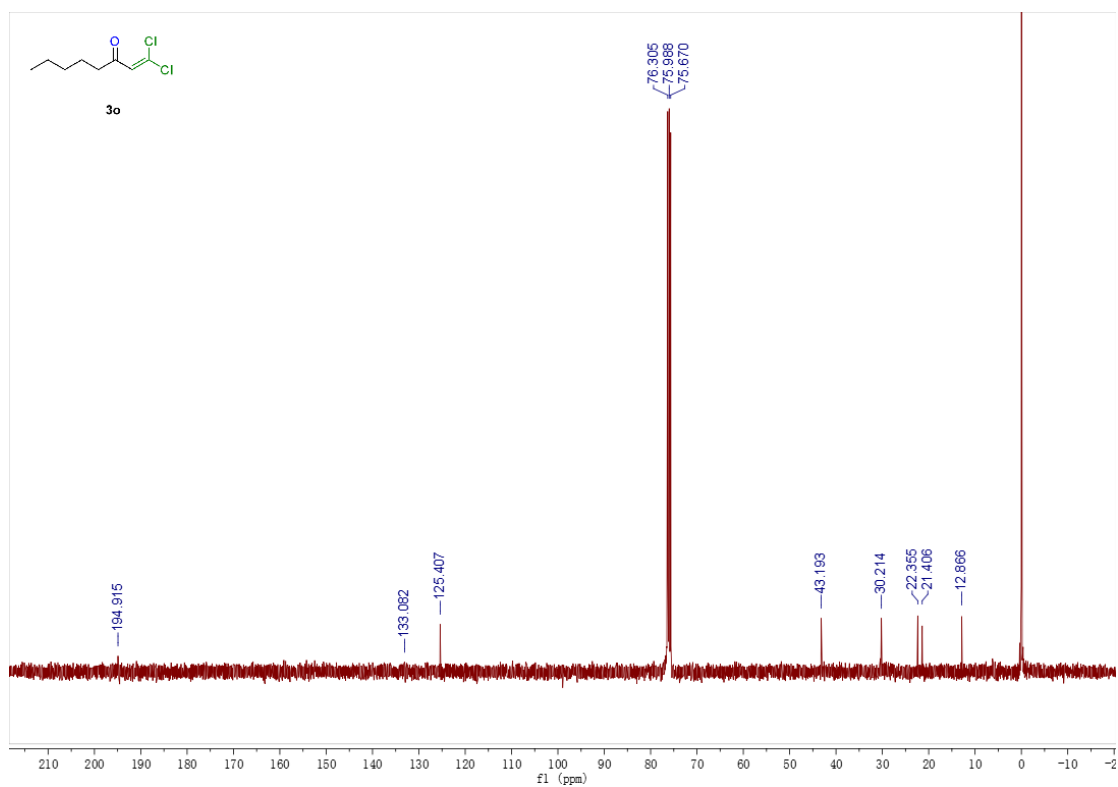

Figure S78. <sup>1</sup>H NMR and <sup>13</sup>C{<sup>1</sup>H} NMR of 3o.

Elemental Composition Report

Page 1

Single Mass Analysis

Tolerance = 20.0 PPM / DBE: min = -1.5, max = 50.0

Element prediction: Off

Number of isotope peaks used for i-FIT = 3

Monoisotopic Mass, Even Electron Ions

199 formula(e) evaluated with 1 results within limits (up to 50 closest results for each mass)

Elements Used:

C: 8-8 H: 13-13 O: 0-8 F: 0-10 Na: 0-1 Cl: 1-3 Se: 0-3 Te: 0-3

10  
0707-1-492 5 (0.051)

1: TOF MS ES+  
1.71e+002

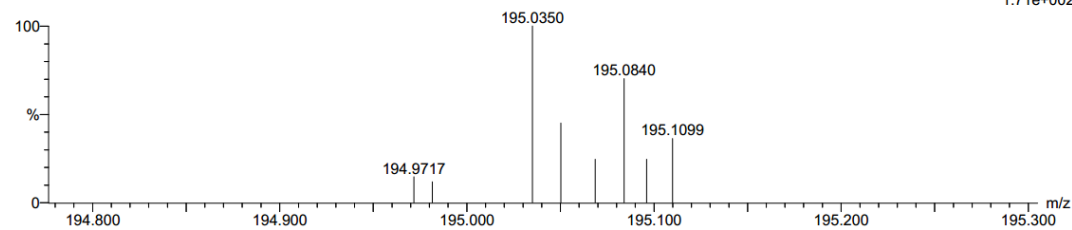

Minimum: 5.0 20.0 -1.5  
Maximum: 50.0

| Mass     | Calc. Mass | mDa | PPM | DBE | i-FIT | Norm | Conf (%) | Formula      |
|----------|------------|-----|-----|-----|-------|------|----------|--------------|
| 195.0350 | 195.0343   | 0.7 | 3.6 | 1.5 | 61.2  | n/a  | n/a      | C8 H13 O Cl2 |

Figure S79. HRMS Spectra of 3o.

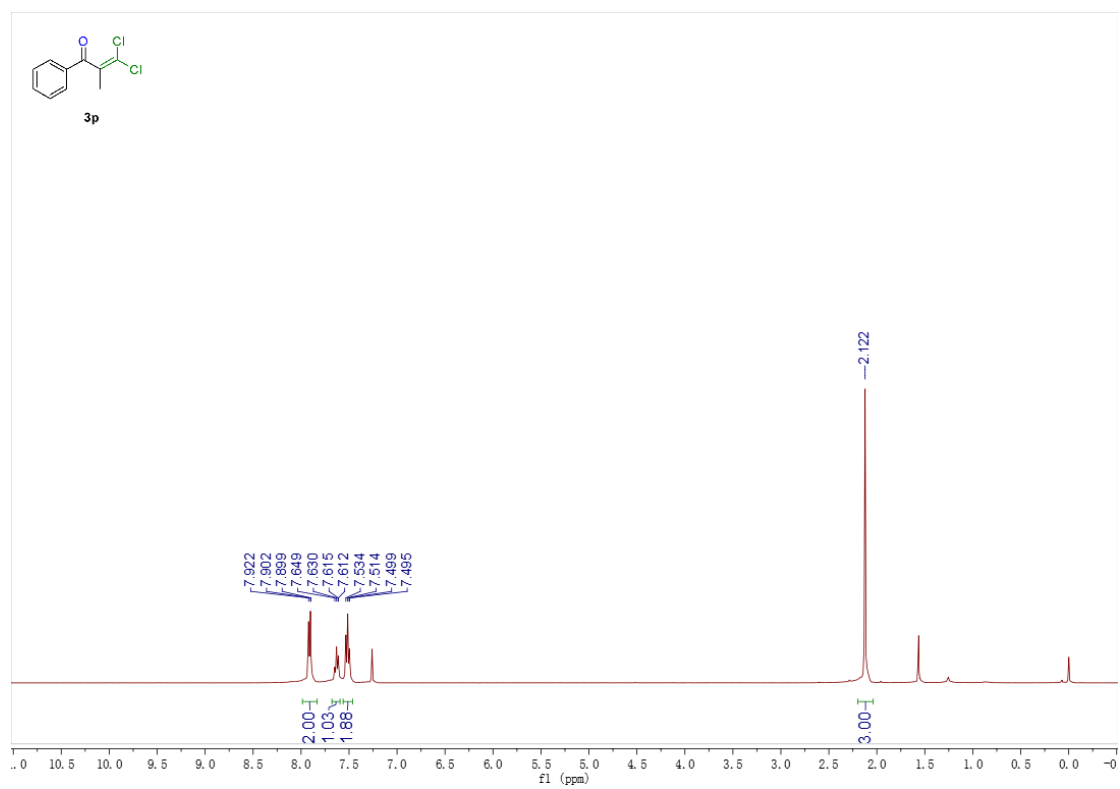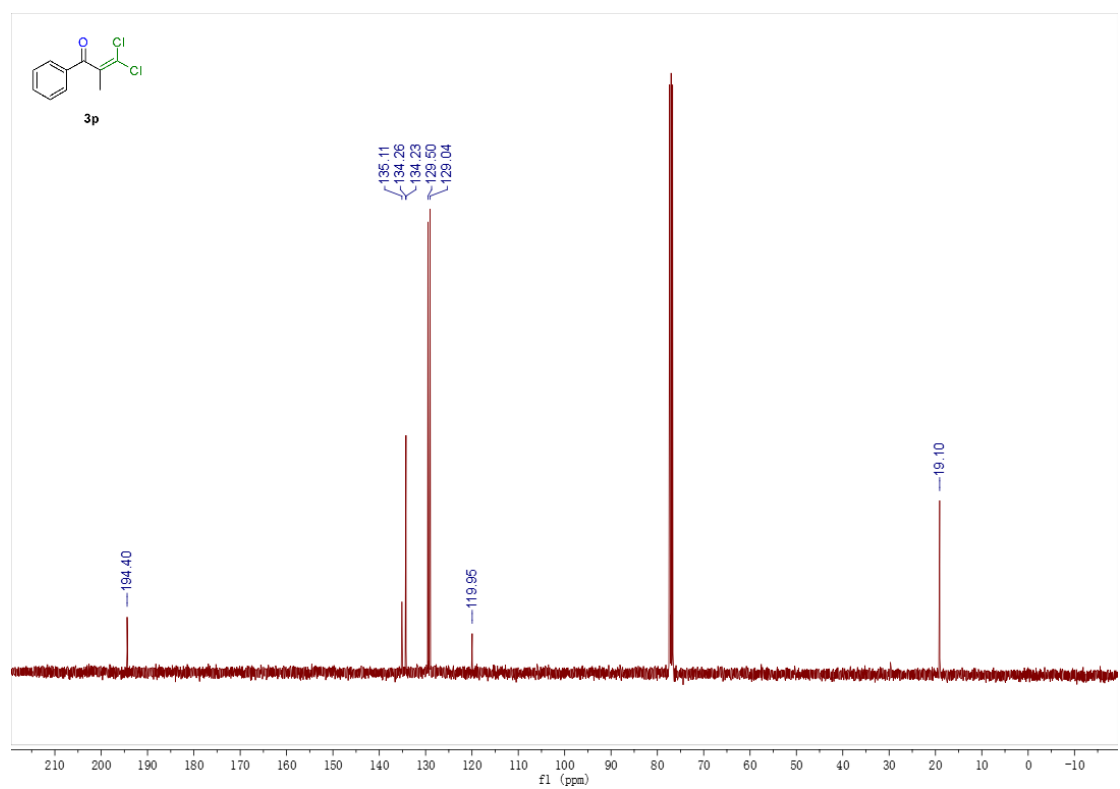

**Figure S80.**  $^1\text{H}$  NMR and  $^{13}\text{C}\{^1\text{H}\}$  NMR of **3p**.

## Single Mass Analysis

Tolerance = 20.0 PPM / DBE: min = -1.5, max = 50.0

Element prediction: Off

Number of isotope peaks used for i-FIT = 3

Monoisotopic Mass, Even Electron Ions

171 formula(e) evaluated with 1 results within limits (up to 50 closest results for each mass)

Elements Used:

C: 10-10 H: 0-26 N: 0-20 O: 0-20 Cl: 1-3

12

0521-1-25 28 (0.180)

1: TOF MS ES+  
4.94e+002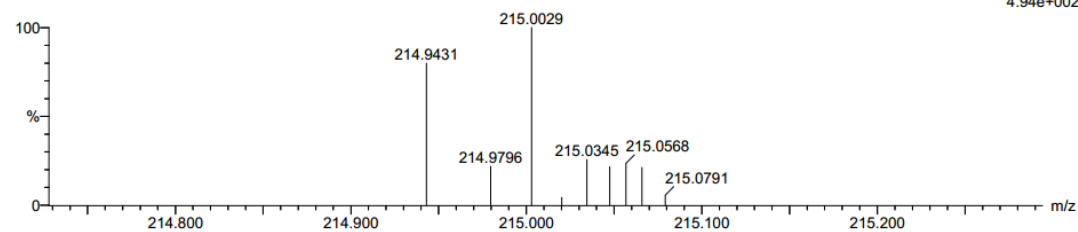Minimum: -1.5  
Maximum: 5.0 20.0 50.0

| Mass     | Calc. Mass | mDa  | PPM  | DBE | i-FIT | Norm | Conf (%) | Formula      |
|----------|------------|------|------|-----|-------|------|----------|--------------|
| 215.0029 | 215.0030   | -0.1 | -0.5 | 5.5 | 72.9  | n/a  | n/a      | C10 H9 O Cl2 |

Figure S81. HRMS Spectra of 3p.

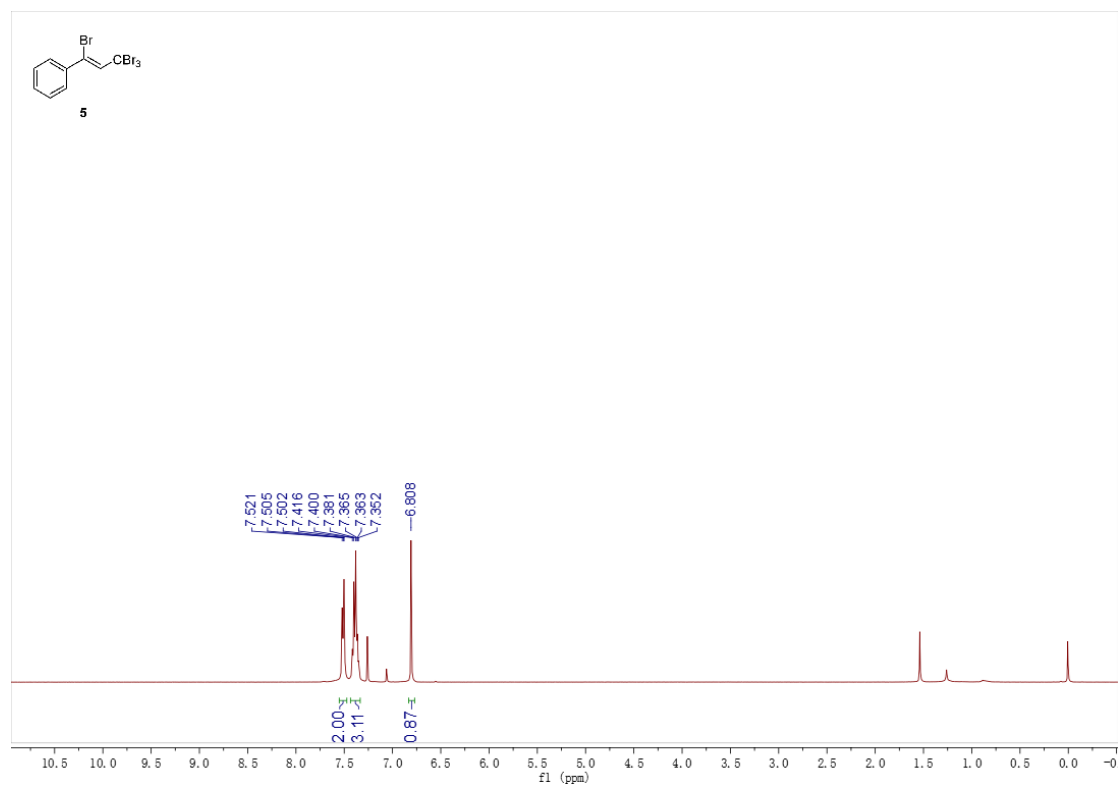

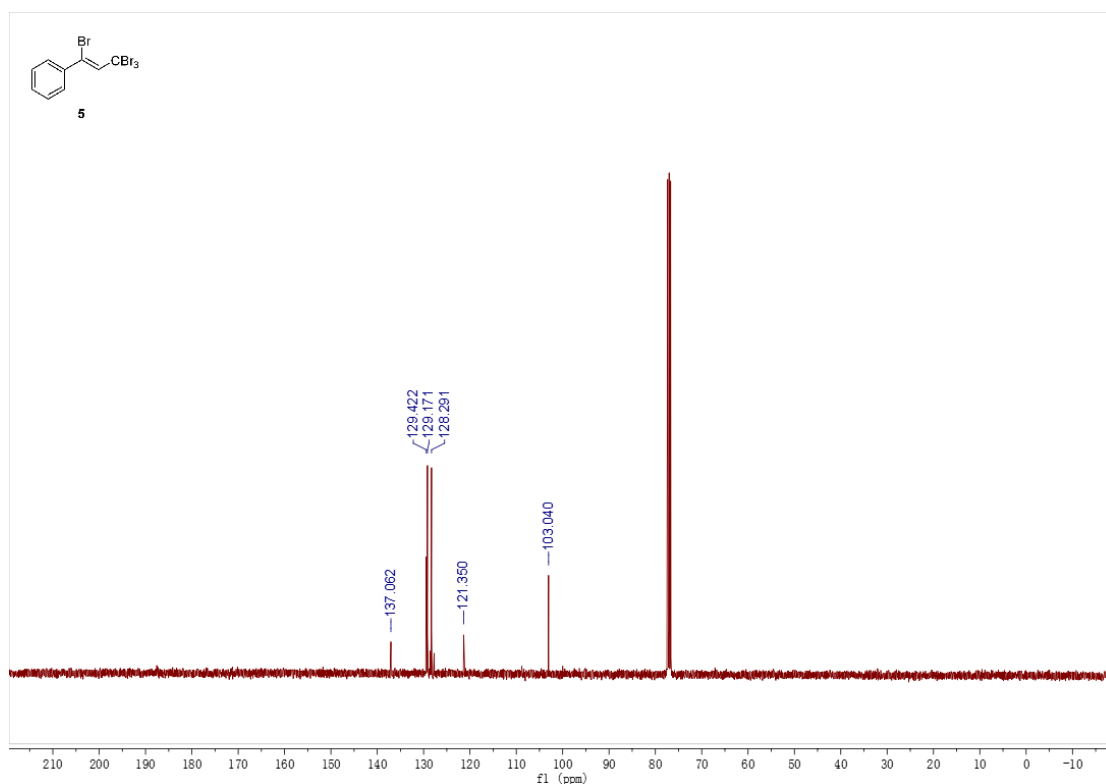

Figure S82.  $^1\text{H}$  NMR and  $^{13}\text{C}\{^1\text{H}\}$  NMR of **5**.

Elemental Composition Report

Page 1

Single Mass Analysis

Tolerance = 20.0 PPM / DBE: min = -1.5, max = 50.0

Element prediction: Off

Number of isotope peaks used for i-FIT = 3

Monoisotopic Mass, Even Electron Ions

170 formula(e) evaluated with 1 results within limits (up to 50 closest results for each mass)

Elements Used:

C: 9-9 H: 6-6 N: 0-8 Se: 0-3 Br: 1-4 Na: 0-1

10

0707-1-412 22 (0.157)

1: TOF MS ES+  
1.42e+002

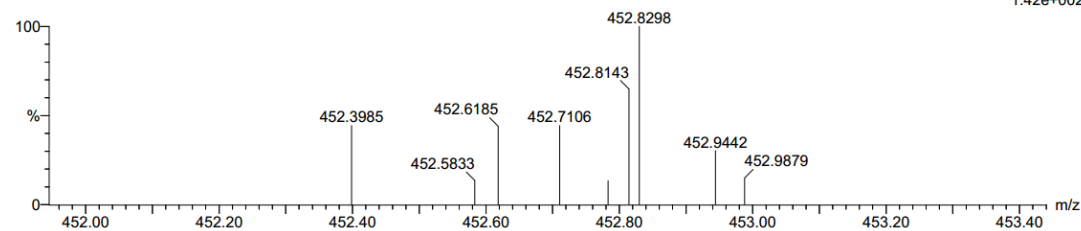

Minimum: -1.5  
Maximum: 5.0 20.0 50.0

| Mass     | Calc. Mass | mDa | PPM | DBE | i-FIT | Norm | Conf (%) | Formula      |
|----------|------------|-----|-----|-----|-------|------|----------|--------------|
| 452.7106 | 452.7101   | 0.5 | 1.1 | 4.5 | 57.4  | n/a  | n/a      | C9 H6 Br4 Na |

Figure S83. HRMS Spectra of **5**.

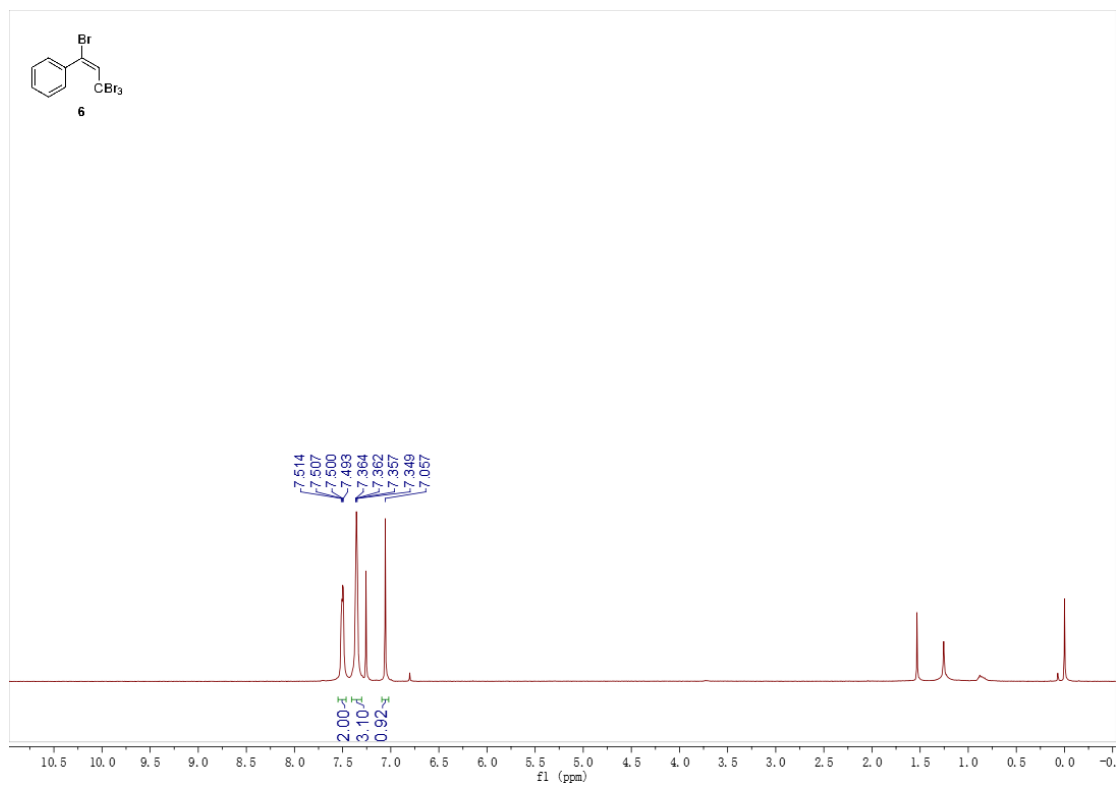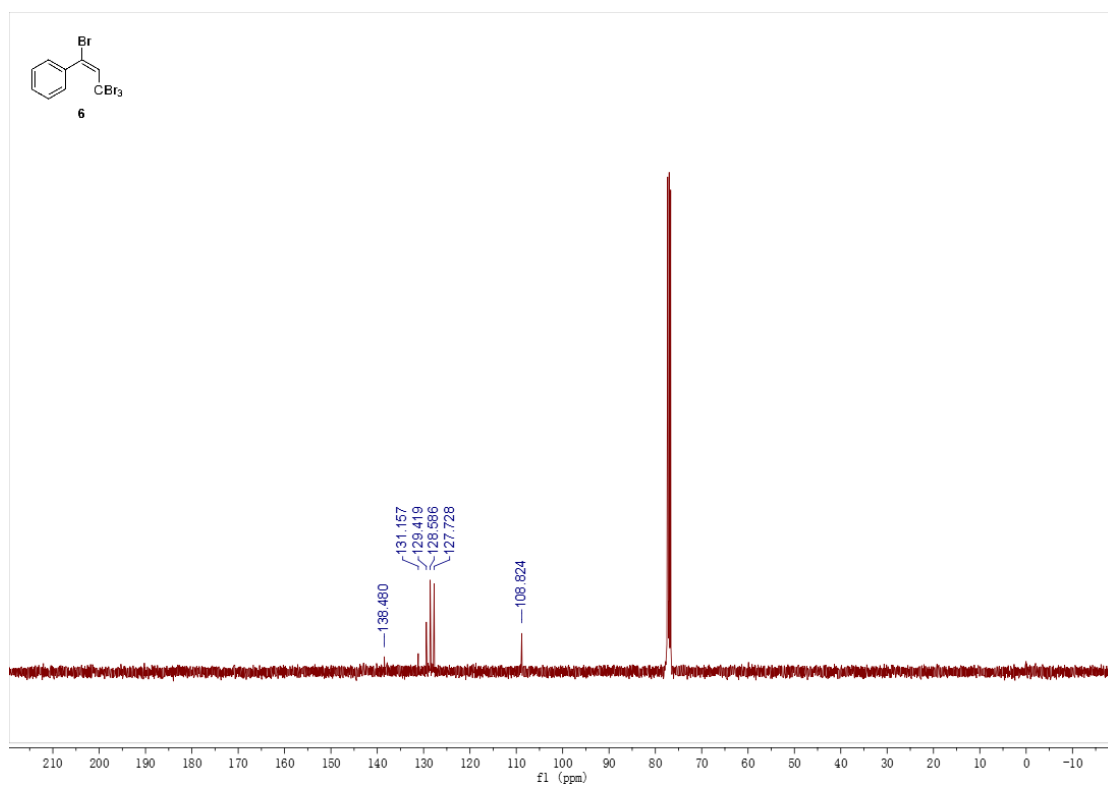

Figure S84.  $^1\text{H}$  NMR and  $^{13}\text{C}\{^1\text{H}\}$  NMR of 6.

Single Mass Analysis

Tolerance = 20.0 PPM / DBE: min = -1.5, max = 50.0

Element prediction: Off

Number of isotope peaks used for i-FIT = 3

Monoisotopic Mass, Even Electron Ions

87 formula(e) evaluated with 1 results within limits (up to 50 closest results for each mass)

Elements Used:

C: 9-9 H: 7-7 N: 0-8 Se: 0-3 Br: 1-4

10  
0707-1-438 15 (0.112)

1: TOF MS ES+  
8.20e+001

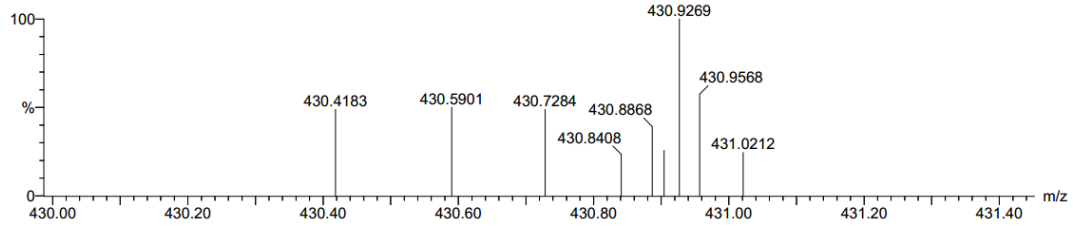

Minimum: -1.5  
Maximum: 5.0 20.0 50.0

| Mass     | Calc. Mass | mDa | PPM | DBE | i-FIT | Norm | Conf (%) | Formula   |
|----------|------------|-----|-----|-----|-------|------|----------|-----------|
| 430.7284 | 430.7281   | 0.3 | 0.7 | 4.5 | 59.4  | n/a  | n/a      | C9 H7 Br4 |

Figure S85. HRMS Spectra of 6.
